# Supplementary material for: Synthesis and evaluation of sensitive coumarin-based fluorogenic substrates for discovery of α-N-acetyl galactosaminidases through droplet-based screening
Source: Royal Society of Chemistry journal article supplement (doi:10.1039/d0ob02484h), 2020-12-18

# **Synthesis and evaluation of sensitive coumarin-based fluorogenic substrates for discovery of $\alpha$ -N-acetyl galactosaminidases through droplet-based screening**

Hong-Ming Chen<sup>†</sup>, Seyed Amirhossein Nasser<sup>†</sup>, Peter Rahfeld, Jacob F. Wardman, Maurits Kohsiek, and  
Stephen G. Withers

*Department of Chemistry, University of British Columbia  
2036 Main Mall, Vancouver, B.C., Canada*

<sup>†</sup> These authors have contributed equally to this work

## Table of Contents

|                                                                                    |    |
|------------------------------------------------------------------------------------|----|
| Table of Contents .....                                                            | 2  |
| List of the abbreviations .....                                                    | 3  |
| Synthesis and characterization of compounds .....                                  | 4  |
| Testing the substrates for droplet-based screen.....                               | 19 |
| Determining the spectroscopic and chemical properties of coumarin derivatives..... | 22 |
| Plots of pKa determination.....                                                    | 26 |
| References .....                                                                   | 44 |
| NMR spectra .....                                                                  | 47 |

## List of abbreviations

**ACN** Acetonitrile

**$\alpha$ -GalNAcases**  $\alpha$ -N-acetyl-galactosaminidase

**3-CU** 3-Carboxyumbelliferone

**$\delta$**  Chemical shift

**DMF** N,N-Dimethylformamide

**DCM** Dichloromethane

***E. coli*** *Escherichia coli*

**GalNAc**  $\alpha$ -N-acetyl-galactosamine

**IPTG** Isopropyl  $\beta$ -D-thiogalactoside

***J*** Coupling constant

**JB** Jericho Blue. 8-Fluoro-3-carboxyumbelliferone

**LB** Lysogeny broth, also known as Luria broth

**LRMS** Low resolution mass spectroscopy

**MU** 4-Methylumbelliferone

**PBS** Phosphate buffered Saline

**PB** Pacific Blue. 6,8-difluoro-3-carboxyumbelliferone

**TFMU** 4-Trifluoromethylumbelliferone

**THF** Tetrahydrofuran

## Synthesis and characterization of compounds

### General Information

All chemicals were of analytical grade and purchased from the Sigma-Aldrich company, unless otherwise stated. All solvents were BOC standard grade and dried before use. Dichloromethane and pyridine were distilled from calcium hydride. Methanol was distilled from magnesium. THF was distilled from sodium. DMF was dried and stored over 4 Å molecular sieves. Analytical thin-layer chromatography (TLC) was performed on aluminum-backed sheets of Silica Gel 60F<sub>254</sub> (E. Merck) of thickness 0.2 mm. The plates were visualised using UV light (254 nm) and/or by exposure to 10% ammonium molybdate (2 M in H<sub>2</sub>SO<sub>4</sub>) followed by charring. Flash column chromatography was carried out using Silicycle (230-400 mesh). Proton and carbon NMR spectra were recorded on Bruker Advance 400inv, 400 dir and 300 Fourier Transform spectrometers fitted with a 5 mm BBI-Z probe. All spectra were recorded using an internal deuterium lock and are referenced internally using the residual solvent peak. Carbon and proton chemical shifts are quoted in parts per million (ppm) downfield of tetramethylsilane, fluorine chemical shifts are quoted downfield of trifluoroacetic acid. Coupling constants (*J*) are given in Hertz (Hz). Carbon NMR spectra were measured with broadband proton decoupling and were recorded with DEPT. Mass spectra were measured on a Waters/Micromass LCT instrument in methanol using electrospray ionisation (ESI) and recorded using the Time-Of-Flight (TOF) method.

### General Procedures

#### Glycosylation

A mixture of the silyl-protected glycosyl fluoride **14** (0.45 mmol, 1.5 equiv), the tetrabutylammonium salt of the coumarin (0.30 mmol) and 4 Å molecular sieves (100 mg) in anhydrous dichloromethane (10 mL) was stirred for 15 minutes at room temperature under N<sub>2</sub>, and then cooled on an ice bath. To the mixture was added BF<sub>3</sub>·Et<sub>2</sub>O (0.17 mL, 1.38 mmol, 4.6 equiv) as one portion, the reaction mixture was stirred for 24 h at 0°C, diluted with dichloromethane (20 mL), filtered through Celite and washed with dichloromethane (20 mL). The combined dichloromethane filtrate was washed with saturated NaHCO<sub>3</sub> (30 mL) and brine (30 mL), dried over MgSO<sub>4</sub>, filtered and concentrated. The resulting residue was purified by flash column chromatography (petroleum ether-ethyl acetate) to afford the product as a solid.

## Synthesis and characterization of compounds

### Attempted synthesis of GalNAc- $\alpha$ -Pacific Blue 1

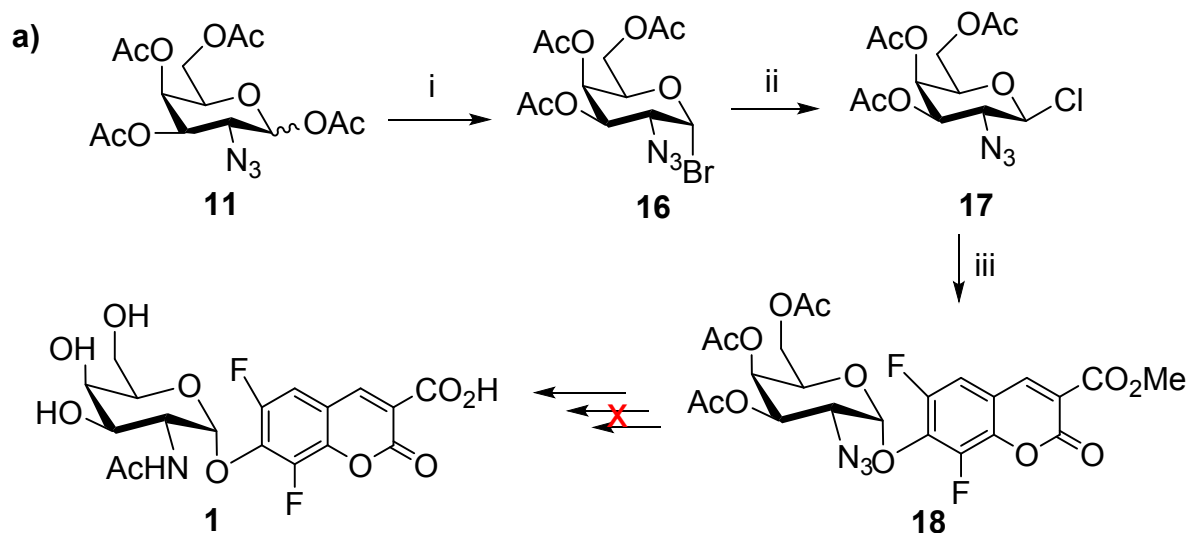

**Scheme S1.** Reagents and conditions: i. DCM, EtOAc, Ac<sub>2</sub>O, TiBr<sub>4</sub>, rt, 94%. ii. ACN, TEAC, rt. iii. ACN, Ag<sub>2</sub>CO<sub>3</sub>, AgClO<sub>4</sub>, 3Å Molecular sieves, PB methyl ester, Lutidine, rt, 36%

While efficient syntheses of the Pacific Blue coumarin have been published<sup>1,2</sup> coupling of this in an alpha configuration to GalNAc has not. Such syntheses of alpha-configured GalNAc derivatives can be challenging.

Our initial approach (Scheme S1) involved synthesis of the per-O-acetylated 2-azido-2-deoxy beta glucosyl chloride from the alpha bromide<sup>3-5</sup> using tetraethylammonium chloride.<sup>6,7</sup> Displacement of the chloride by the methyl ester of the Pacific Blue coumarin<sup>8-9</sup> using a silver catalyst in acetonitrile yielded a mixture of the alpha and beta anomers in yields of 36 and 21% respectively.<sup>6</sup> While far from ideal, this approach provided material with which to assess optimal routes for deprotection and amide formation. However, all attempts to reduce the azide and acetylate it to give the acetamide resulted in rapid decomposition of the glycoside. We therefore inverted the order and first deprotected the sugar acetates under Zemplen conditions.<sup>10-12</sup> This was successful and the 2-azido glycoside was isolated. However, this unprotected glycoside decomposed very quickly. The planned glycoside therefore had no future as a screening substrate.

**3-(Carboxyl methyl ester)-6,8-difluoro-umbelliferyl 2-Azido-2-deoxy-3,4,6-tri-O-acetyl- $\alpha$ -D-galactopyranosyl fluoride (18):** To a solution of 2-azido-2-deoxy-1,3,4,6-tetra-O-acetyl-D-galactopyranose (**11**) (537 mg, 1.44 mmol) in anhydrous DCM (8 mL) were added EtOAc (0.8 mL) and TiBr<sub>4</sub> (1.3 g, 3.54 mmol, 2.5 equiv), and the reaction mixture was stirred overnight at room temperature. Another portion of TiBr<sub>4</sub> (0.2 g) was added, and the reaction mixture was stirred for 2 days. The reaction mixture was diluted with DCM (75 mL), washed with cold NaHCO<sub>3</sub> (2 x 50 mL) and cold brine (50 mL), dried over MgSO<sub>4</sub>, filtered and evaporated, dried under vacuum to afford **2-azido-2-deoxy-3,4,6-tri-O-**

**acetyl- $\alpha$ -D-galactopyranosyl bromide (16)** as a colorless syrup (532 mg, 94%). To the solution of bromide (532 mg) in dry acetonitrile (27 mL) was added tetraethylammonium chloride in dry acetonitrile (27 mL) in one portion, the reaction mixture was stirred for 20 minutes at room temperature under  $N_2$ . The reaction mixture was diluted with toluene (400 mL), washed with cold water (2 x 200 mL) and cold brine (200 mL), dried over  $MgSO_4$ , filtered and evaporated, dried under vacuum to afford **2-azido-2-deoxy-3,4,6-tri-O-acetyl- $\beta$ -D-galactopyranosyl chloride (17)** as a colorless syrup (470 mg, 100%). A suspension of PB methyl ester (160 mg, 0.63 mmol), lutidine (0.3 mL),  $Ag_2CO_3$  (400 mg),  $AgClO_4$  (60 mg) and 3 Å molecular sieves in dry acetonitrile (15 mL) was stirred for 0.5 h at room temperature under  $N_2$ . To this suspension was added dropwise a solution of crude chloride (265 mg, 0.76 mmol, 1.2 equiv) in dry acetonitrile (15 mL), and the reaction mixture was stirred for 6 days at room temperature. The reaction mixture was diluted with acetone, filtered through Celite and washed with acetone, concentrated to give a brown residue. The brown residue was redissolved in EtOAc (150 mL), washed with 1 M HCl (50 mL) and brine (50 mL), filtered and concentrated. The resulting residue was purified by flash column chromatography (2:1 & 3:2 petroleum ether-ethyl acetate) to afford the product as a white solid (127 mg, 36% based on PB methyl ester) and its  $\beta$ -anomer (75 mg, 21%).  $^1H$  NMR ( $d_6$ -Acetone, 400 MHz)  $\alpha$ -anomer:  $\delta$  8.69 (s, 1 H, Ar-H), 7.68 (dd, 1 H,  $J_{H,F}$  2.2,  $J_{H,F}$  9.4 Hz, Ar-H), 5.42 (d, 1 H,  $J_{1,2}$  4.4 Hz, H-1), 5.18 (d, 1 H, H-4), 4.88 (dd, 1 H,  $J_{3,4}$  3.2 Hz,  $J_{2,3}$  10.8 Hz, H-3), 4.08 (m, 1 H, H-5), 4.00 (t, 1 H, H-2), 3.97 (dd, 1 H,  $J_{5,6a}$  3.6 Hz, H-6a), 3.88 (s, 3 H,  $OCH_3$ ), 3.87 (dd, 1 H,  $J_{5,6b}$  7.6 Hz,  $J_{6a,6b}$  11.2 Hz, H-6b), 2.09 (s, 3 H,  $CH_3CO$ ), 1.96 (s, 3 H,  $CH_3CO$ ), 1.93 (s, 3 H,  $CH_3CO$ ).  $^{13}C$  NMR ( $d_6$ -Acetone, 100 MHz)  $\alpha$ -anomer:  $\delta$  170.0, 169.9, 169.2, 162.9, 154.3, 151.5 (dd,  $J_{C,F}$  3.0 Hz & 245.0 Hz), 147.3 (d,  $J_{C,F}$  3.0 Hz), 142.6 (dd,  $J_{C,F}$  5.0 Hz & 252.0 Hz), 141.1 (dd,  $J_{C,F}$  2.0 Hz & 10.0 Hz), 133.8 (dd,  $J_{C,F}$  13.0 Hz & 18.0 Hz), 119.5, 116.1 (dd,  $J_{C,F}$  1.0 Hz & 10.0 Hz), 110.5 (dd,  $J_{C,F}$  4.0 Hz & 21.0 Hz), 83.7, 69.2, 67.8, 67.7, 62.2, 58.8, 52.3, 19.8 (3s). ESI-MS  $\alpha$ -anomer: Calcd for  $[C_{23}H_{21}F_2N_3O_{12} + Na]^+$ : 592.1; Found m/z: 592.0.  $^1H$  NMR ( $d_6$ -Acetone, 400 MHz)  $\beta$ -anomer:  $\delta$  8.65 (s, 1 H, Ar-H), 7.68 (dd, 1 H,  $J_{H,F}$  1.8,  $J_{H,F}$  10.2 Hz, Ar-H), 5.46 (d, 1 H,  $J_{1,2}$  8.0 Hz, H-1), 5.39 (d, 1 H, H-4), 5.12 (dd, 1 H,  $J_{3,4}$  3.2 Hz,  $J_{2,3}$  10.8 Hz, H-3), 4.31 (m, 1 H, H-5), 4.18-4.10 (m, 3 H, H-2 & H-6), 3.88 (s, 3 H,  $OCH_3$ ), 2.09 (s, 3 H,  $CH_3CO$ ), 2.04 (s, 3 H,  $CH_3CO$ ), 1.92 (s, 3 H,  $CH_3CO$ ).  $^{13}C$  NMR ( $d_6$ -Acetone, 100 MHz)  $\beta$ -anomer:  $\delta$  170.1, 169.7, 169.3, 162.9, 154.3, 151.4 (d,  $J_{C,F}$  245.0 Hz), 147.4, 142.7 (d,  $J_{C,F}$  251.0 Hz), 141.3 (d,  $J_{C,F}$  7.0 Hz), 136.9 (dd,  $J_{C,F}$  10.0 Hz & 15.0 Hz), 118.9, 114.8 (d,  $J_{C,F}$  10.0 Hz), 110.9 (dd,  $J_{C,F}$  3.0 Hz & 21.0 Hz), 102.6, 71.7, 71.1, 66.5, 61.5, 61.0, 52.3, 19.8 (3s). ESI-MS  $\beta$ -anomer: Calcd for  $[C_{23}H_{21}F_2N_3O_{12} + Na]^+$ : 592.1; Found m/z: 592.0.

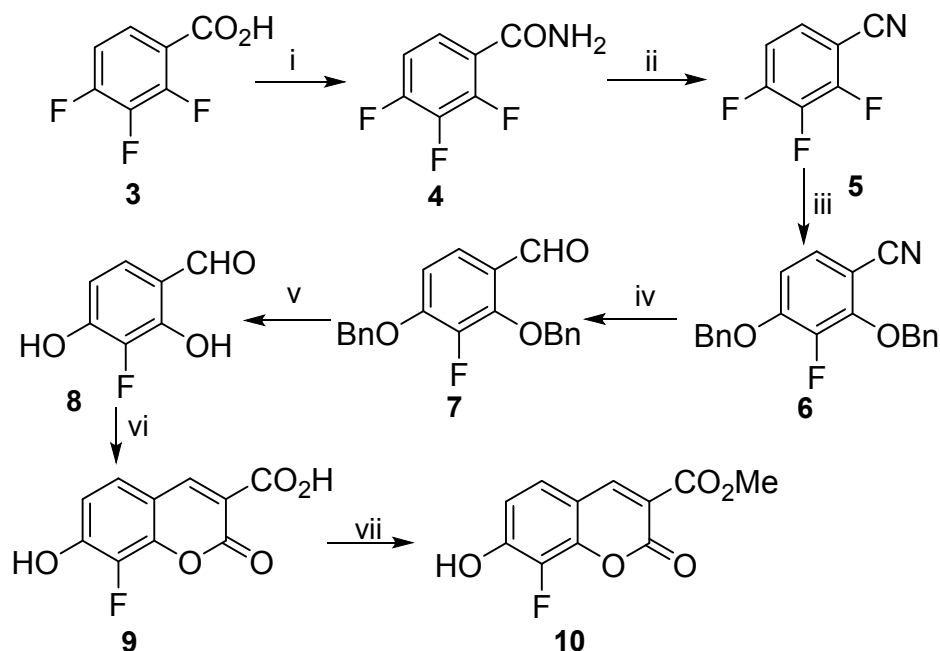

**Scheme S2.** Reagents and conditions: i. DCM, oxalyl chloride, DMF, rt;  $\text{CHCl}_3$ ,  $\text{NH}_4\text{OH}$ ,  $0^\circ\text{C}$ . ii.  $\text{POCl}_3$ ,  $80^\circ\text{C}$ . iii. DMF,  $\text{BnOH}$ ,  $\text{K}_2\text{CO}_3$ ,  $105^\circ\text{C}$ . iv. DCM, DIBAL in cyclohexane (1 M),  $-78^\circ\text{C}$ . v. MeOH, THF,  $\text{H}_2$ , Pd/C, rt. vi.  $\text{H}_2\text{O}$ , Meldrum's acid,  $\text{NH}_4\text{OAc}$ , rt. vii. MeOH,  $\text{H}_2\text{SO}_4$ , refluxed, 90%

For the discussion regarding the synthesis of Jericho Blue (Scheme S2), please refer to the manuscript.

**2,3,4-Trifluorobenzamide (4):** To a suspension of compound **3** (5 g, 28.6 mmol) in anhydrous DCM (40 mL), stirred at room temperature, was added oxalyl chloride (3 mL, 34.9 mmol, 1.2 equiv) as one portion, and then two drops of dry DMF were added (note: a lot of gas is generated). The reaction mixture was stirred for 23 h at room temperature while venting to the air to release the evolved gases. The solvents were evaporated under reduced pressure, co-evaporated with  $\text{CHCl}_3$  three times to afford a black oil. To the black oil in  $\text{CHCl}_3$  (22 mL), cooled with ice-bath, was quickly added ammonium hydroxide (31 mL) while stirring vigorously. After addition, the reaction mixture was stirred under the same conditions for another hour. The white precipitate was filtered and washed with water and dried under vacuum. The filtrate was separated into two layers and the aqueous phase then extracted with DCM (50 mL x 3). The combined organic phase was dried over  $\text{MgSO}_4$ , filtered and evaporated to afford another portion of product. The total amount of white solid was 4.39 g (88%).  $^1\text{H}$  NMR ( $\text{CDCl}_3$ , 400 MHz):  $\delta$  7.99 (dddd, 1 H, Ar-H), 7.11 (dddd, 1 H, J 2.0, 5.6, 8.8, 16.0 Hz, Ar-H), 6.53 (s, 1 H, NH), 6.33 (s, 1 H, NH).  $^{13}\text{C}$  NMR ( $\text{CDCl}_3$ , 100 MHz):  $\delta$  163.5, 153.6 (ddd, J 3.6, 10.0, 255.6 Hz), 150.4 (ddd, 3.7, 11.1, 250.2 Hz), 139.9 (ddd, J 15.6, 16.8, 251.5 Hz), 126.2 (ddd, 1.3, 3.9, 6.4 Hz), 118.1 (m), 113.0 (dd, J 3.6, 17.4 Hz).  $^{19}\text{F}$ -NMR ( $\text{CDCl}_3$ , 282 MHz):  $\delta$  -127.5 (dd, J 11.6, 20.3 Hz), -134.6 (dd), -159.7 (t). EI-HRMS: Calcd for  $\text{C}_7\text{H}_4\text{F}_3\text{NO}$ : 175.02450; Found m/z: 175.02403.

**2,3,4-Trifluorobenzonitrile (5):** A mixture of compound **4** (4.39 g, 25.1 mmol) and phosphoryl chloride (20 mL) was stirred for 3 h at  $80^\circ\text{C}$  under  $\text{N}_2$ , diluted with diethyl ether (60 mL). The reaction mixture was slowly poured into a beaker containing ice water while cooling with an ice bath and stirred at  $0^\circ\text{C}$ . Saturated  $\text{NaHCO}_3$  was added dropwise then the mixture extracted with diethyl ether (150 mL x 3). The combined organic phase was washed with saturated  $\text{NaHCO}_3$  (200 mL) and brine (200 mL), dried over

MgSO<sub>4</sub>, filtered and concentrated to afford a colorless oil (3.668, 93%). <sup>1</sup>H NMR (CDCl<sub>3</sub>, 400 MHz): δ 7.45 (m, 1 H, Ar-H), 7.15 (dddd, 1 H, J 2.0, 6.8, 9.2, 16.0 Hz, Ar-H). <sup>13</sup>C NMR (CDCl<sub>3</sub>, 100 MHz): δ 154.7 (ddd, J 3.0, 10.0, 260.0 Hz), 153.1 (ddd, 4.0, 12.0, 262.0 Hz), 140.4 (ddd, J 13.0, 16.0, 255.0 Hz), 128.1 (dd, 5.0, 9.0 Hz), 114.1 (dd, J 4.0, 19.0 Hz), 112.3, 99.5 (dd, J 4.0, 14.0 Hz). <sup>19</sup>F-NMR (CDCl<sub>3</sub>, 282 MHz): δ -123.1 (dd, J 11.6, 20.3 Hz), -126.7 (t), -156.8 (t). EI-HRMS: Calcd for C<sub>7</sub>H<sub>2</sub>F<sub>3</sub>N: 157.01393; Found m/z: 157.01386.

**2,4-Bis(benzyloxy)-3-fluorobenzonitrile (6):** To a solution of compound **5** (3.587 g, 22.8 mmol) in dry DMF (3.5 mL) were added benzyl alcohol (12 mL) and anhydrous K<sub>2</sub>CO<sub>3</sub> (19 g), and the suspension was stirred for 18 h at 105°C under N<sub>2</sub>. The reaction mixture was cooled down to room temperature, and diluted with EtOAc (20 mL), filtered and the solids washed with EtOAc (300 mL). The combined EtOAc solution was washed with water (150 mL x 2) and brine (150 mL), dried over MgSO<sub>4</sub>, filtered and concentrated to afford an off-white solid. This was crystallized from ethanol to give a white solid (5.96 g). The mother liquor was concentrated and purified by flash column chromatography (1:1 petroleum ether-DCM) to afford another portion of product (0.7 g). The total amount of white solid was 6.66 g (88%). <sup>1</sup>H NMR (CDCl<sub>3</sub>, 400 MHz): δ 7.52-7.33 (m, 10 H, Ar-H), 7.23 (dd, 1 H, J 2.0, 8.8 Hz, Ar-H), 6.74 (dd, 1 H, J 7.2 Hz, Ar-H), 5.34 (s, 2 H, CH<sub>2</sub>), 5.18 (s, 2 H, CH<sub>2</sub>). <sup>13</sup>C NMR (CDCl<sub>3</sub>, 100 MHz): δ 152.3 (d, J 9.0 Hz), 149.4 (d, J 10.0 Hz), 145.6 (d, J 248.0 Hz), 135.8, 135.4, 128.9, 128.8, 128.7, 128.66, 128.5, 127.5, 116.0 (J 4.0 Hz), 109.7, 100.2 (J 3.0 Hz), 76.3 (d, J 7.0 Hz), 71.7. <sup>19</sup>F-NMR (CDCl<sub>3</sub>, 282 MHz): δ -148.9. EI-HRMS: Calcd for C<sub>21</sub>H<sub>16</sub>FNO<sub>2</sub>: 333.11651; Found m/z: 333.11678.

**2,4-Bis(benzyloxy)-3-fluorobenzaldehyde (7):** To a solution of compound **6** (6.6 g, 19.8 mmol) in anhydrous DCM (25 mL), stirred at -78°C under N<sub>2</sub>, was added, dropwise diisobutylaluminum hydride (25 mL, 1 M in cyclohexane). The reaction mixture was stirred for 4 h under the same conditions, stirred for 0.5 h at room temperature, and then cooled to 0°C. To the mixture was added dropwise HCl (0.5 M, 80 mL) with stirring to quench the reaction. After addition, the mixture was stirred overnight at room temperature and extracted with EtOAc (100 mL x 4). The organic phase was washed with water (200 mL x 2) and brine (200 mL), dried over MgSO<sub>4</sub>, filtered and concentrated, then dried under vacuum to afford a slightly yellow solid (6.64 g, 100%). <sup>1</sup>H NMR (CDCl<sub>3</sub>, 400 MHz): δ 10.18 (s, 1 H, CHO), 7.61 (dd, 1 H, J 2.0, 8.8 Hz, Ar-H), 7.51-7.36 (m, 10 H, Ar-H), 6.86 (dd, 1 H, J 7.2 Hz, Ar-H), 5.33 (s, 2 H, CH<sub>2</sub>), 5.25 (s, 2 H, CH<sub>2</sub>). <sup>13</sup>C NMR (CDCl<sub>3</sub>, 75 MHz): δ 188.2 (d, J 2.7 Hz), 153.4 (d, J 9.1 Hz), 150.1 (d, J 8.3 Hz), 145.4 (d, J 246.6 Hz), 136.0, 135.6, 128.9, 128.8, 128.7, 128.6, 128.5, 127.6, 123.7 (J 3.9 Hz), 123.6, 109.3, 76.9 (d, J 7.2 Hz), 71.5. <sup>19</sup>F-NMR (CDCl<sub>3</sub>, 282 MHz): δ -150.5. EI-HRMS: Calcd for C<sub>21</sub>H<sub>17</sub>FO<sub>3</sub>: 336.11617; Found m/z: 336.11641.

**2,4-Dihydroxy-3-fluorobenzaldehyde (8):** A mixture of compound **7** (6.57 g, 19.5 mmol), Pd/C (10%, 1.05 g) and methanol-THF (7:3, 63 mL) was evacuated and refilled with H<sub>2</sub> three times, and stirred for 5 h at room temperature under H<sub>2</sub> atmosphere. The reaction mixture was filtered through a short pad of Celite and washed with methanol and EtOAc. After evaporation of solvent, the resulting residue was purified by flash column chromatography (dry loaded, 80:20:1, petroleum ether-EtOAc-AcOH) to afford the product as a white solid (2.5 g, 82%). <sup>1</sup>H NMR (d<sub>6</sub>-Acetone, 400 MHz): δ 11.4 (brs, 1 H, OH), 9.86 (s, 1 H, CHO), 7.47 (d, 1 H, J 8.8 Hz, Ar-H), 6.71 (t, 1 H, J<sub>H,F</sub> 7.6 Hz, Ar-H), 3.26 (brs, 1 H, OH). <sup>13</sup>C NMR (d<sub>6</sub>-Acetone, 75 MHz): δ 195.6 (d, J 2.5 Hz), 152.7 (d, J 9.7 Hz), 151.3 (d, J 9.6 Hz), 139.3 (d, J 239.0 Hz), 130.0 (d, J 3.5 Hz), 115.9 (d, J 1.4 Hz), 109.4. <sup>19</sup>F-NMR (CDCl<sub>3</sub>, 282 MHz): δ -165.0. EI-HRMS: Calcd for C<sub>7</sub>H<sub>5</sub>FNO<sub>3</sub>: 156.02227; Found m/z: 156.02215.

**8-Fluoro-7-hydroxy-2-oxo-2H-chromene-3-carboxylic acid** (Jericho Blue, **9**): To a suspension of compound **8** (2.2 g, 14.1 mmol) in water (65 mL) were added Meldrum's acid (2.22 g, 15.4 mmol) and ammonium acetate (330 mg, 4.3 mmol), the suspension was stirred for 3 h at room temperature, 10% more Meldrum's acid and ammonium acetate were added again and the mixture stirred for another 1.5 h under the same conditions. The reaction mixture was cooled down with an ice bath, HCl (2 M, 40 mL) was added and the mixture stirred for 15 minutes at 0°C, and then stored in the fridge for 1 h. The solid was filtered and washed with cold water, and then dried under vacuum to afford the final product as a slightly yellow solid (3.077 g, 97%). <sup>1</sup>H NMR (d<sub>6</sub>-DMSO, 400 MHz): δ 11.5 (brs, 1 H, OH), 8.69 (s, 1 H, Ar-H), 7.55 (d, 1 H, J 8.2 Hz), 6.98 (t, 1 H, J<sub>H,F</sub> 8.0 Hz, Ar-H). <sup>13</sup>C NMR (d<sub>6</sub>-DMSO, 75 MHz): δ 164.5, 156.7, 151.3 (d, J 8.7 Hz), 149.9 (d, J 1.6 Hz), 144.8 (d, J 8.5 Hz), 137.9 (d, J 243.1 Hz), 126.6 (d, J 3.5 Hz), 114.8, 114.0, 111.9. <sup>19</sup>F-NMR (d<sub>6</sub>-DMSO, 282 MHz): δ -160.1. ESI-HRMS: Calcd for [C<sub>10</sub>H<sub>5</sub>FNO<sub>5</sub> – H]<sup>–</sup>: 223.0043; Found m/z: 223.0047.

**Methyl 8-Fluoro-7-hydroxy-2-oxo-2H-chromene-3-carboxylate** (**10**): To a suspension of compound **9** (0.96 g, 4.3 mmol) in dry methanol (50 mL) were added concentrated H<sub>2</sub>SO<sub>4</sub> (2 drops), and the suspension was refluxed overnight under N<sub>2</sub> (suspension-clear-suspension)<sup>13,14</sup>. The reaction mixture was cooled down to room temperature, and then to 0°C. The yellowish precipitate was filtered and washed with cold methanol to afford **10** (0.918 g, 90%). <sup>1</sup>H NMR (d<sub>6</sub>-DMSO + D<sub>2</sub>O, 400 MHz): δ 8.72 (s, 1 H, Ar-H), 7.57 (d, 1 H, J 8.8 Hz), 6.99 (t, 1 H, J<sub>H,F</sub> 8.0 Hz, Ar-H). <sup>13</sup>C NMR (d<sub>6</sub>-DMSO, 75 MHz): δ 163.8, 155.8, 151.5 (d, J 8.7 Hz), 150.3 (d, J 2.0 Hz), 145.0 (d, J 8.3 Hz), 137.9 (d, J 243.2 Hz), 126.7 (d, J 3.5 Hz), 114.9, 113.3, 111.8, 52.9. <sup>19</sup>F-NMR (d<sub>6</sub>-DMSO, 282 MHz): δ -160.1. ESI-MS: Calcd for [C<sub>11</sub>H<sub>6</sub>FNO<sub>5</sub> – H]<sup>–</sup>: 237.2; Found m/z: 237.1.

### Tetrabutylammonium coumarin salt preparation (19a-19i)

As is noted below, in order to render the coumarins soluble under the conditions used for glycoside formation they had to be used as their tetrabutylammonium salts. Conversion to this salt form was accomplished by treatment of **10** with tetrabutylammonium hydroxide in methanol as solvent (Scheme S3).<sup>15</sup> Use of any other alcohol resulted in partial transesterification of the methyl ester moiety. The crude salt obtained after evaporation of methanol was dissolved in a minimum amount of dichloromethane and precipitated out using diethyl ether to afford a yellow solid, which was dried under vacuum and used in the glycosylation reactions without further purification (**19a-19i**).

To a suspension of the coumarin (1 mmol) in MeOH (7.5 mL) was added dropwise 0.1 M tetrabutylammonium hydroxide in MeOH (10 mL, 1 equiv) with stirring, and the reaction mixture was stirred for 15 minutes at room temperature. After evaporation, the product was precipitated out with DCM and diethyl ether to afford the salts as a yellow solid. The solid was dried under vacuum and used directly without further purification.

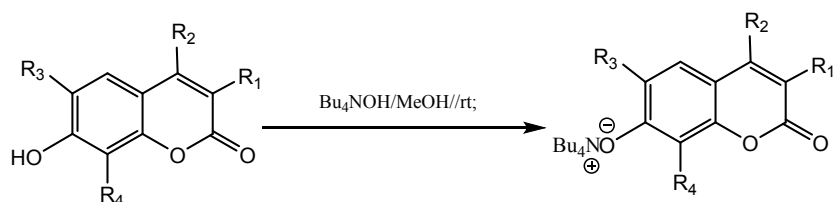

- 19a:**  $R_1=\text{H}$ ,  $R_2=\text{Me}$ ,  $R_3=\text{H}$ ,  $R_4=\text{H}$ , 90%  
**19b:**  $R_1=\text{H}$ ,  $R_2=\text{Me}$ ,  $R_3=\text{F}$ ,  $R_4=\text{F}$ , 87%  
**19c:**  $R_1=\text{CO}_2\text{Me}$ ,  $R_2=\text{H}$ ,  $R_3=\text{H}$ ,  $R_4=\text{F}$ , 100%  
**19d:**  $R_1=\text{H}$ ,  $R_2=\text{Me}$ ,  $R_3=\text{Cl}$ ,  $R_4=\text{H}$ , 91%  
**19e:**  $R_1=\text{CO}_2\text{Me}$ ,  $R_2=\text{H}$ ,  $R_3=\text{Cl}$ ,  $R_4=\text{H}$ , 94%  
**19f:**  $R_1=\text{CO}_2\text{Me}$ ,  $R_2=\text{H}$ ,  $R_3=\text{H}$ ,  $R_4=\text{Cl}$ , 89%  
**19g:**  $R_1=\text{CO}_2\text{Me}$ ,  $R_2=\text{H}$ ,  $R_3=\text{H}$ ,  $R_4=\text{H}$ , 69%  
**19h:**  $R_1=\text{H}$ ,  $R_2=\text{CF}_3$ ,  $R_3=\text{H}$ ,  $R_4=\text{H}$ , 89%  
**19i:**  $R_1=\text{H}$ ,  $R_2=\text{CF}_3$ ,  $R_3=\text{F}$ ,  $R_4=\text{F}$ , 88%

**Scheme S3.** Reagents and conditions: 1 M  $\text{Bu}_4\text{NOH}$  in MeOH, MeOH, rt.

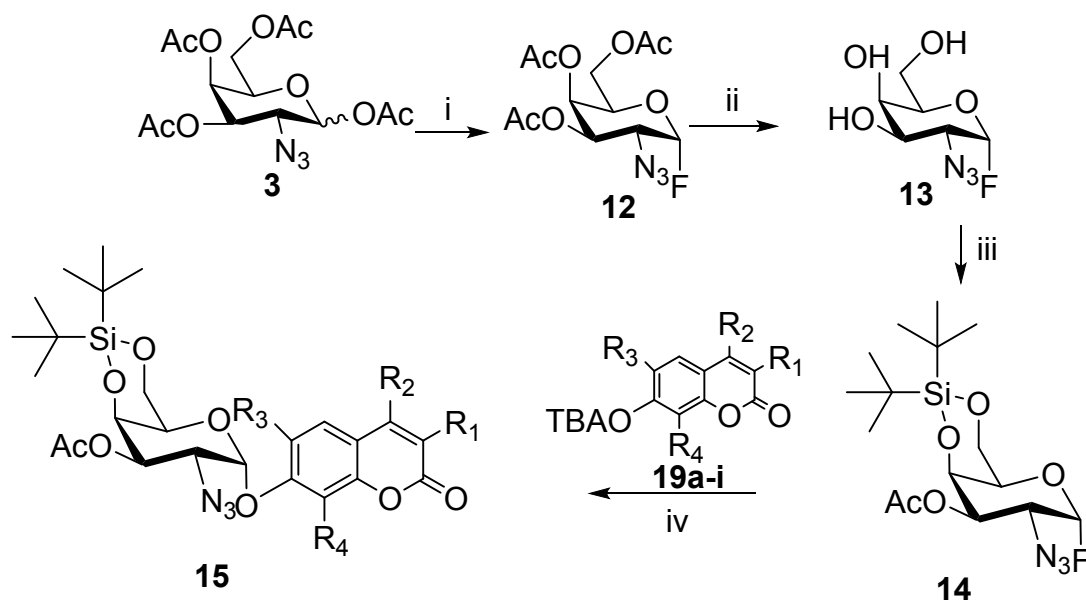

- 15a:  $R_1=H, R_2=Me, R_3=H, R_4=H$   
 15b:  $R_1=H, R_2=Me, R_3=F, R_4=F$   
 15c:  $R_1=CO_2Me, R_2=H, R_3=H, R_4=F$   
 15d:  $R_1=H, R_2=Me, R_3=Cl, R_4=H$   
 15e:  $R_1=CO_2Me, R_2=H, R_3=Cl, R_4=H$   
 15f:  $R_1=CO_2Me, R_2=H, R_3=H, R_4=Cl$   
 15g:  $R_1=CO_2Me, R_2=H, R_3=H, R_4=H$   
 15h:  $R_1=H, R_2=CF_3, R_3=H, R_4=H$   
 15i:  $R_1=H, R_2=CF_3, R_3=F, R_4=F$

**Scheme S4.** Reagents and conditions: i). DCM, HF/Pyridine, 0°C, 93%. ii). MeOH, NH<sub>3</sub>, 0°C, 95%. iii). Pyridine, di-*tert*-butylsilylbistriflate, 0°C-rt; Ac<sub>2</sub>O, rt, 81%. iv). DCM, Coumarin.TBA salt (15a-i), 4Å Molecular sieves, BF<sub>3</sub>·Et<sub>2</sub>O, 0°C.

As discussed in the paper, we initially used the method pioneered by Kiso in which a di-*tert*-butylsilylene protecting group installed across the 4 and 6 positions strongly directs  $\alpha$ -glycosylation in Mitsunobu reactions.<sup>16–18</sup> However, we were not able to achieve the described yields. This is likely as a consequence of the low nucleophilicity of the low pKa coumarin derivatives as well as the insolubility of the coumarin derivatives in the appropriate solvents. However, once converted to their tetrabutylammonium salts (See scheme S3), these compounds dissolve well in dichloromethane. We finally shifted our strategy to use of a glycosyl fluoride donor and coupling under catalysis from BF<sub>3</sub>·Et<sub>2</sub>O. The final scheme is shown in Scheme S4 and was used to carry out the couplings of the range of coumarin aglycones shown.

2-Azido-2-deoxy-D-galactose was generated from D-galactosamine hydrochloride by neutralisation using potassium carbonate in water then reaction with triflic azide.<sup>19–23</sup> After acetylation in pyridine and acetic anhydride, the protected azidogalactose **3** was treated with HF/pyridine in dichloromethane to convert it to the protected  $\alpha$ -fluoride. Deacetylation was accomplished by dissolving this compound in dry methanol and bubbling in ammonia gas for 5 minutes at 0°C, then stirring overnight under the same conditions.<sup>24</sup> The 2-azido-2-deoxy-D-galactosyl fluoride product (**13**) was silylated at the 4,6-positions by treatment with di-*tert*-butyl bis(trifluoromethanesulfonate) in pyridine and then acetylated *in-situ* to give the protected azidogalactosyl fluoride **14** as the key intermediate. Glycoside formation was achieved by coupling the galactosyl fluoride with the tetrabutylammonium salt of the coumarin in

dichloromethane in the presence of boron trifluoride diethyl etherate. The resultant protected umbelliferyl  $\alpha$ -azido-galactosides were purified by flash silica chromatography.

**2-Azido-2-deoxy-3,4,6-tri-*O*-acetyl- $\alpha$ -D-galactopyranosyl fluoride (12):** A solution of 2-azido-2-deoxy-1,3,4,6-tetra-*O*-acetyl-D-galactopyranose (**11**) (2.24 g, 6 mmol) in anhydrous DCM (15 mL) was transferred to a 100 mL plastic bottle, cooled down to 0°C, and then HF/Pyridine (15 mL, 70% HF in pyridine) was added. The plastic bottle was capped and stirred overnight at 0°C. The reaction mixture was slowly poured (be very careful) into a plastic beaker with ice, saturated NaHCO<sub>3</sub> and solid NaHCO<sub>3</sub> cooled with an ice bath. The crude product was extracted with ethyl acetate (2 x 100 mL), washed with saturated NaHCO<sub>3</sub> (2 x 100 mL) and brine (100 mL), dried over MgSO<sub>4</sub>, filtered and concentrated. The resulting residue was purified by flash column chromatography (5:1 petroleum ether-ethyl acetate) to afford the product as a colorless syrup (1.85 g, 93%). <sup>1</sup>H NMR (CDCl<sub>3</sub>, 400 MHz):  $\delta$  5.64 (dd, 1 H, J<sub>1,2</sub> 2.4 Hz, J<sub>H,F</sub> 52.4 Hz, H-1), 5.49 (d, 1 H, H-4), 5.32 (dd, 1 H, J<sub>3,4</sub> 3.2 Hz, H-3), 4.38 (m, 1 H, H-5), 4.13 (dd, 1 H, J<sub>5,6a</sub> 6.0 Hz, J<sub>6a,6b</sub> 11.2 Hz, H-6a), 4.07 (dd, 1 H, J<sub>5,6b</sub> 4.4 Hz, H-6b), 3.78 (dddd, 1 H, J<sub>2,3</sub> 10.8 Hz, J<sub>H,F</sub> 24.8 Hz, H-2), 2.14 (s, 3 H, CH<sub>3</sub>CO), 2.05 (s, 3 H, CH<sub>3</sub>CO), 2.04 (s, 3 H, CH<sub>3</sub>CO). <sup>13</sup>C NMR (CDCl<sub>3</sub>, 100 MHz):  $\delta$  170.4, 169.9, 169.7, 106.0 (d, J<sub>C,F</sub> 227.0 Hz), 69.3 (d, J<sub>C,F</sub> 3.0 Hz), 68.2, 66.9, 61.3, 57.5 (d, J<sub>C,F</sub> 24.0 Hz), 20.72, 20.66, 20.6. <sup>19</sup>F-NMR (CDCl<sub>3</sub>, 282 MHz):  $\delta$  -148.4. ESI-HRMS: Calcd for [C<sub>12</sub>H<sub>16</sub>FN<sub>3</sub>O<sub>7</sub> + Na]<sup>+</sup>: 356.0870; Found m/z: 356.0872.

**2-Azido-2-deoxy- $\alpha$ -D-galactopyranosyl fluoride (13):** To a solution of **12** (566 mg, 1.7 mmol) in anhydrous methanol (20 mL) was bubbled gaseous ammonia for 5 minutes at 0°C, and the reaction mixture then stirred overnight at 0°C. The solvent was evaporated at reduced pressure, and the resulting residue was purified by flash column chromatography (9:1 DCM-MeOH) to afford the product as a colorless syrup (333 mg, 95%). <sup>1</sup>H NMR (D<sub>2</sub>O, 400 MHz):  $\delta$  5.69 (dd, 1 H, J<sub>1,2</sub> 2.4 Hz, J<sub>H,F</sub> 53.6 Hz, H-1), 3.98 (m, 3 H, H-3, 4 & 5), 3.77 (dd, 1 H, J<sub>5,6a</sub> 6.4 Hz, J<sub>6a,6b</sub> 11.2 Hz, H-6a), 3.73 (dd, 1 H, J<sub>5,6b</sub> 5.2 Hz, H-6b), 3.65 (dddd, J<sub>2,3</sub> 10.4 Hz, J<sub>H,F</sub> 26.8 Hz, H-2). <sup>13</sup>C NMR (CD<sub>3</sub>OD, 100 MHz):  $\delta$  107.0 (d, J<sub>C,F</sub> 222.0 Hz), 73.8 (d, J<sub>C,F</sub> 10.0 Hz), 69.0, 68.1, 61.2, 60.2 (d, J<sub>C,F</sub> 24.0 Hz). <sup>19</sup>F-NMR (D<sub>2</sub>O, 282 MHz):  $\delta$  -148.8. ESI-HRMS: Calcd for [C<sub>6</sub>H<sub>10</sub>N<sub>3</sub>FO<sub>4</sub> + Na]<sup>+</sup>: 230.0553; Found m/z: 230.0558.

**2-Azido-2-deoxy-3-*O*-acetyl-4,6-*O*-di-*tert*-butylsilylene- $\alpha$ -D-galactopyranosyl fluoride (14):** To a solution of **13** (1.016 g, 4.91 mmol) in dry pyridine (70 mL), stirred at 0°C under N<sub>2</sub>, was added di-*tert*-butylsilyl bis(trifluoromethanesulfonate) (2.03 mL, 2.74 g, 6.23 mmol, 1.3 equiv) as one portion. The reaction mixture was stirred for 1 h under the same conditions and then stirred overnight at rt. To the reaction mixture was added acetic anhydride (3.2 mL) and the mixture was stirred for 1.5 h at room temperature. After evaporation of solvent, the resulting residue was redissolved in EtOAc (200 mL), washed with cold 1 M HCl (100 mL), cold NaHCO<sub>3</sub> (100 mL) and cold brine (100 mL), dried over MgSO<sub>4</sub>, filtered and concentrated. The resulting residue was purified by flash column chromatography (15:1 petroleum ether-EtOAc) to afford **18** as a white solid (1.55 g, 81%). <sup>1</sup>H NMR (CDCl<sub>3</sub>, 400 MHz):  $\delta$  5.73 (dd, 1 H, J<sub>1,2</sub> 2.8 Hz, J<sub>H,F</sub> 52.8 Hz, H-1), 5.10 (dd, 1H, J<sub>3,4</sub> 2.8 Hz, J<sub>2,3</sub> 11.2 Hz, H-3), 4.78 (d, 1 H, H-4), 4.28 (dd, 1 H, J<sub>5,6a</sub> 2.6 Hz, J<sub>6a,6b</sub> 13.2 Hz, H-6a), 4.21 (dd, 1 H, J<sub>5,6b</sub> 1.6 Hz, H-6b), 3.97 (m, 1 H, H-5), 3.95 (dddd, 1 H, J<sub>H,F</sub> 26.0 Hz, H-2), 2.18 (s, 3 H, CH<sub>3</sub>CO), 1.03 (2 s, 18 H). <sup>13</sup>C NMR (CDCl<sub>3</sub>, 100 MHz):  $\delta$  170.4, 106.8 (d, J<sub>C,F</sub> 226.0 Hz), 71.2, 69.7, 69.5 (d, J<sub>C,F</sub> 2.0 Hz), 66.5, 57.1 (d, J<sub>C,F</sub> 23.0 Hz), 27.6, 27.2, 23.3, 20.9, 20.8. <sup>19</sup>F-NMR (CDCl<sub>3</sub>, 282 MHz):  $\delta$  -147.9. ESI-HRMS: Calcd for [C<sub>16</sub>H<sub>28</sub>FN<sub>3</sub>O<sub>5</sub>Si + H]<sup>+</sup>: 390.1861; Found m/z: 390.1864.

**4-Methylumbelliferyl 2-azido-2-deoxy-3-*O*-acetyl-4,6-*O*-di-*tert*-butylsilylene- $\alpha$ -D-galactopyranoside (15a):** See general procedure B. The resulting residue was purified by flash column chromatography (4:1

petroleum ether-EtOAc) to afford **15a** as a white solid (71%). <sup>1</sup>H NMR (CDCl<sub>3</sub>, 400 MHz): δ 7.53 (d, 1 H, J 8.8 Hz, Ar-H), 7.12 (d, 1 H, J 2.4 Hz, Ar-H), 7.03 (dd, 1 H, Ar-H), 6.18 (d, 1 H, J 0.8 Hz, Ar-H), 5.71 (d, 1 H, J<sub>1,2</sub> 3.2 Hz, H-1), 5.33 (dd, 1H, J<sub>3,4</sub> 2.8 Hz, J<sub>2,3</sub> 10.8 Hz, H-3), 4.79 (d, 1 H, H-4), 4.21 (dd, 1 H, J<sub>5,6a</sub> 2.0 Hz, J<sub>6a,6b</sub> 12.8 Hz, H-6a), 4.09 (dd, 1 H, J<sub>5,6b</sub> 1.2 Hz, H-6b), 4.06 (dd, 1 H, H-2), 3.84 (m, 1 H, H-5), 2.40 (d, 3 H, J 0.8 Hz), 2.21 (s, 3 H, CH<sub>3</sub>CO), 1.07 (s, 9 H), 1.02 (s, 9 H). <sup>13</sup>C NMR (CDCl<sub>3</sub>, 100 MHz): δ 170.6, 161.0, 159.0, 155.1, 152.3, 125.9, 115.4, 113.7, 113.2, 104.4, 97.4, 71.2, 70.0, 68.5, 66.7, 56.7, 27.7, 27.3, 23.4, 21.0, 20.9, 18.8. ESI-HRMS: Calcd for [C<sub>26</sub>H<sub>35</sub>FN<sub>3</sub>O<sub>8</sub>Si + H]<sup>+</sup>: 546.2272; Found m/z: 546.2275.

**6,8-Difluoro-4-methylumbelliferyl 2-azido-2-deoxy-3-O-acetyl-4,6-O-di-tert-butylsilylene-α-D-galactopyranoside (15b)**: See general procedure B. The resulting residue was purified by flash column chromatography (6:1 petroleum ether-EtOAc) to afford **15b** as a white solid (74%). <sup>1</sup>H NMR (CDCl<sub>3</sub>, 400 MHz): δ 7.17 (dd, 1 H, J<sub>H,F</sub> 2.0 Hz & 10.0 Hz, Ar-H), 6.34 (s, 1 H, Ar-H), 5.68 (d, 1 H, J<sub>1,2</sub> 3.6 Hz, H-1), 5.34 (dd, 1H, J<sub>3,4</sub> 2.8 Hz, J<sub>2,3</sub> 10.8 Hz, H-3), 4.85 (d, 1 H, H-4), 4.30 (m, 2 H, H-5 & H-6a), 4.09 (m, 2 H, H-2 & H-6b), 2.40 (d, 3 H, J 1.2 Hz), 2.22 (s, 3 H, CH<sub>3</sub>CO), 1.05 (s, 9 H), 1.02 (s, 9 H). <sup>13</sup>C NMR (CDCl<sub>3</sub>, 100 MHz): δ 170.5, 158.7, 152.0 (dd, J<sub>C,F</sub> 3.0 Hz & 245.0 Hz), 151.2, 144.2 (dd, J<sub>C,F</sub> 5.0 Hz & 253.0 Hz), 139.7 (dd, J<sub>C,F</sub> 4.0 Hz & 10.0 Hz), 135.3 (dd, J<sub>C,F</sub> 12.0 Hz & 16.0 Hz), 117.0 (d, J<sub>C,F</sub> 9.0 Hz), 116.0, 106.1 (dd, J<sub>C,F</sub> 4.0 Hz & 22.0 Hz), 102.1, 71.6, 70.4, 69.2, 67.1, 57.0, 27.7, 27.3, 23.4, 21.0, 20.8, 18.9. <sup>19</sup>F-NMR (CDCl<sub>3</sub>, 282 MHz): δ -131.7 (d, J 3.1 Hz), -145.2 (d). ESI-HRMS: Calcd for [C<sub>26</sub>H<sub>33</sub>F<sub>2</sub>N<sub>3</sub>O<sub>8</sub>Si + Na]<sup>+</sup>: 604.1903; Found m/z: 604.1906.

**3-(Carboxyl methyl ester)-8-fluoro-umbelliferyl 2-azido-2-deoxy-3-O-acetyl-4,6-O-di-tert-butylsilylene-α-D-galactopyranoside (15c)**: See general procedure B. The resulting residue was purified by flash column chromatography (4:1 & 3:1 petroleum ether-EtOAc) to afford **15c** as a white solid (70%). <sup>1</sup>H NMR (CDCl<sub>3</sub>, 400 MHz): δ 8.50 (s, 1 H, Ar-H), 7.36 (dd, 1 H, J 0.8 Hz and 7.6 Hz, Ar-H), 7.21 (dd, 1 H, J 8.8 Hz, Ar-H), 5.74 (d, 1 H, J<sub>1,2</sub> 3.6 Hz, H-1), 5.30 (dd, 1H, J<sub>3,4</sub> 2.8 Hz, J<sub>2,3</sub> 10.8 Hz, H-3), 4.84 (d, 1 H, H-4), 4.23 (dd, 1 H, J<sub>5,6a</sub> 1.6 Hz, J<sub>6a,6b</sub> 12.8 Hz, H-6a), 4.12 (dd, 1 H, H-2), 4.06 (d, 1 H, H-6b), 3.96 (m, 1 H, H-5), 3.91 (s, 3 H, OCH<sub>3</sub>), 2.12 (s, 3 H, CH<sub>3</sub>CO), 1.03 (s, 9 H), 1.00 (s, 9 H). <sup>13</sup>C NMR (CDCl<sub>3</sub>, 100 MHz): δ 170.4, 163.5, 155.2, 149.0 (d, J<sub>C,F</sub> 8.0 Hz), 148.7 (d, J<sub>C,F</sub> 1.0 Hz), 144.6 (d, J<sub>C,F</sub> 7.0 Hz), 140.2 (d, J<sub>C,F</sub> 261.0 Hz), 125.0 (d, J<sub>C,F</sub> 4.0 Hz), 116.4, 114.5, 113.9, 98.9, 71.3, 69.8, 68.9, 66.6, 56.8, 53.0, 27.6, 27.3, 23.3, 20.9, 20.8. <sup>19</sup>F-NMR (CDCl<sub>3</sub>, 282 MHz): δ -151.5 (s). ESI-HRMS: Calcd for [C<sub>27</sub>H<sub>34</sub>FN<sub>3</sub>O<sub>10</sub>Si + Na]<sup>+</sup>: 630.1895; Found m/z: 630.1896.

**6-Chloro-4-methyl-umbelliferyl 2-Azido-2-deoxy-3-O-acetyl-4,6-O-di-tert-butylsilylene-α-D-galactopyranoside (15d)**: See general procedure B. The resulting residue was purified by flash column chromatography (9:1 & 6:1 petroleum ether-EtOAc) to afford **15d** as a white solid (62%). <sup>1</sup>H NMR (CDCl<sub>3</sub>, 400 MHz): δ 7.59 (s, 1 H, Ar-H), 7.21 (s, 1 H, Ar-H), 6.21 (d, 1 H, J 0.8 Hz, Ar-H), 5.74 (d, 1 H, J<sub>1,2</sub> 3.6 Hz, H-1), 5.33 (dd, 1H, J<sub>3,4</sub> 2.8 Hz, J<sub>2,3</sub> 10.8 Hz, H-3), 4.85 (d, 1 H, H-4), 4.20 (dd, 1 H, J<sub>5,6a</sub> 2.0 Hz, J<sub>6a,6b</sub> 12.8 Hz, H-6a), 4.15 (dd, 1 H, H-2), 4.06 (dd, 1 H, J<sub>5,6b</sub> 1.2 Hz, H-6b), 3.84 (m, 1 H, H-5), 2.38 (d, 3 H, J 0.8 Hz, Ar-CH<sub>3</sub>), 2.20 (s, 3 H, CH<sub>3</sub>CO), 1.06 (s, 9 H), 1.01 (s, 9 H). <sup>13</sup>C NMR (CDCl<sub>3</sub>, 100 MHz): δ 170.5, 160.4, 154.0, 153.2, 151.4, 125.8, 120.0, 115.8, 114.0, 104.5, 97.7, 71.5, 69.8, 68.8, 66.6, 56.8, 53.0, 27.6, 27.3, 23.3, 21.0, 20.9, 18.7. ESI-HRMS: Calcd for [C<sub>26</sub>H<sub>34</sub>ClN<sub>3</sub>O<sub>8</sub>Si + Na]<sup>+</sup>: 602.1701; Found m/z: 602.1706.

**3-(Carboxyl methyl ester)-6-chloro-umbelliferyl 2-azido-2-deoxy-3-O-acetyl-4,6-O-di-tert-butylsilylene-α-D-galactopyranoside (15e)**: See general procedure B. The resulting residue was purified by flash column chromatography (4:1 petroleum ether-EtOAc) to afford **15e** as a white solid (45%). <sup>1</sup>H NMR (CDCl<sub>3</sub>, 400 MHz): δ 8.48 (s, 1 H, Ar-H), 7.65 (s, 1 H, Ar-H), 7.26 (s, 1 H, Ar-H), 5.77 (d, 1 H, J<sub>1,2</sub> 3.6 Hz, H-1),

5.33 (dd, 1H,  $J_{3,4}$  2.8 Hz,  $J_{2,3}$  10.8 Hz, H-3), 4.87 (d, 1 H, H-4), 4.22 (dd, 1 H,  $J_{5,6a}$  2.4 Hz,  $J_{6a,6b}$  12.8 Hz, H-6a), 4.19 (dd, 1 H, H-2), 4.08 (dd, 1 H,  $J_{5,6b}$  1.5 Hz, H-6b), 3.90 (s, 3 H, OCH<sub>3</sub>), 3.82 (m, 1 H, H-5), 2.22 (s, 3 H, CH<sub>3</sub>CO), 1.08 (s, 9 H), 1.03 (s, 9 H). <sup>13</sup>C NMR (CDCl<sub>3</sub>, 100 MHz): δ 170.5, 163.6, 156.4, 156.2, 155.4, 148.0, 130.2, 121.0, 116.4, 113.4, 103.8, 97.8, 71.4, 69.7, 69.0, 66.5, 56.7, 53.1, 27.6, 27.3, 23.3, 21.0, 20.9. ESI-HRMS: Calcd for [C<sub>27</sub>H<sub>34</sub>ClN<sub>3</sub>O<sub>10</sub>Si + Na]<sup>+</sup>: 646.1600; Found m/z: 646.1605.

**3-(Carboxyl methyl ester)-6-chloro-umbelliferyl 2-azido-2-deoxy-3-O-acetyl-4,6-O-di-*tert*-butylsilylene-α-D-galactopyranoside (15f):** See general procedure B. The resulting residue was purified by flash column chromatography (4:1 & 3:1 petroleum ether-EtOAc) to afford **15f** as a white solid (65%). <sup>1</sup>H NMR (CDCl<sub>3</sub>, 400 MHz): δ 8.51 (s, 1 H, Ar-H), 7.51 (d, 1 H, J 8.8 Hz, Ar-H), 7.23 (d, 1 H, Ar-H), 5.84 (d, 1 H,  $J_{1,2}$  3.6 Hz, H-1), 5.36 (dd, 1H,  $J_{3,4}$  2.8 Hz,  $J_{2,3}$  10.8 Hz, H-3), 4.87 (d, 1 H, H-4), 4.22 (dd, 1 H,  $J_{5,6a}$  2.0 Hz,  $J_{6a,6b}$  13.2 Hz, H-6a), 4.17 (dd, 1 H, H-2), 4.05 (dd, 1 H,  $J_{5,6b}$  0.8 Hz, H-6b), 3.93 (s, 3 H, OCH<sub>3</sub>), 3.88 (m, 1 H, H-5), 2.20 (s, 3 H, CH<sub>3</sub>CO), 1.06 (s, 9 H), 1.02 (s, 9 H). <sup>13</sup>C NMR (CDCl<sub>3</sub>, 100 MHz): δ 170.4, 163.6, 156.9, 155.6, 152.6, 148.8, 128.6, 116.1, 114.0, 112.1, 111.6, 97.7, 71.4, 69.8, 69.0, 66.6, 56.8, 53.1, 27.7, 27.3, 23.3, 21.0, 20.8. ESI-HRMS: Calcd for [C<sub>27</sub>H<sub>34</sub>ClN<sub>3</sub>O<sub>10</sub>Si + Na]<sup>+</sup>: 646.1600; Found m/z: 646.1602.

**3-(Carboxyl methyl ester)-umbelliferyl 2-azido-2-deoxy-3-O-acetyl-4,6-O-di-*tert*-butylsilylene-α-D-galactopyranoside (15g):** See general procedure B. The resulting residue was purified by flash column chromatography (3:1 petroleum ether-EtOAc) to afford **15g** as a white solid (71%). <sup>1</sup>H NMR (CDCl<sub>3</sub>, 400 MHz): δ 8.54 (s, 1 H, Ar-H), 7.56 (d, 1 H, J 8.8 Hz, Ar-H), 7.13 (d, 1 H, J 2.4 Hz, Ar-H), 7.06 (dd, 1 H, Ar-H), 5.73 (d, 1 H,  $J_{1,2}$  3.6 Hz, H-1), 5.31 (dd, 1H,  $J_{3,4}$  2.8 Hz,  $J_{2,3}$  10.8 Hz, H-3), 4.79 (d, 1 H, H-4), 4.21 (dd, 1 H,  $J_{5,6a}$  2.0 Hz,  $J_{6a,6b}$  12.8 Hz, H-6a), 4.11~4.07 (m, 2 H, H-2 & H-6b), 3.94 (s, 3 H, OCH<sub>3</sub>), 3.82 (m, 1 H, H-5), 2.20 (s, 3 H, CH<sub>3</sub>CO), 1.07 (s, 9 H), 1.02 (s, 9 H). <sup>13</sup>C NMR (CDCl<sub>3</sub>, 100 MHz): δ 170.6, 164.0, 161.4, 157.2, 156.8, 149.2, 131.2, 115.3, 114.8, 113.3, 103.8, 97.5, 71.2, 70.0, 68.7, 66.7, 56.3, 53.0, 27.6, 27.3, 23.4, 21.0, 20.9. ESI-HRMS: Calcd for [C<sub>27</sub>H<sub>35</sub>N<sub>3</sub>O<sub>10</sub>Si + Na]<sup>+</sup>: 612.1989; Found m/z: 612.1992.

**4-Trifluoromethyl-umbelliferyl 2-azido-2-deoxy-3-O-acetyl-4,6-O-di-*tert*-butylsilylene-α-D-galactopyranoside (15h):** See general procedure B. The resulting residue was purified by flash column chromatography (15:1 petroleum ether-EtOAc) to afford **15h** as a white solid (69%). <sup>1</sup>H NMR (CDCl<sub>3</sub>, 400 MHz): δ 7.68 (dd, 1 H, Ar-H), 7.18 (d, 1 H, J 2.4 Hz, Ar-H), 7.10 (dd, 1 H, J 8.8 Hz, Ar-H), 6.68 (s, 1 H, Ar-H), 5.74 (d, 1 H,  $J_{1,2}$  3.6 Hz, H-1), 5.33 (dd, 1H,  $J_{3,4}$  2.8 Hz,  $J_{2,3}$  11.2 Hz, H-3), 4.80 (d, 1 H, H-4), 4.22 (dd, 1 H,  $J_{5,6a}$  2.0 Hz,  $J_{6a,6b}$  12.8 Hz, H-6a), 4.09 (m, 2 H, H-2 & H-6b), 3.83 (m, 1 H, H-5), 2.21 (s, 3 H, CH<sub>3</sub>CO), 1.08 (s, 9 H), 1.03 (s, 9 H). <sup>13</sup>C NMR (CDCl<sub>3</sub>, 100 MHz): δ 170.6, 159.9, 159.0, 156.1, 141.5 (q,  $J_{C,F}$  33.0 Hz), 126.8 (d,  $J_{C,F}$  2.0 Hz), 121.6 (q,  $J_{C,F}$  274.0 Hz), 114.7, 113.7 (q,  $J_{C,F}$  6.0 Hz), 108.9, 104.8, 97.5, 71.2, 70.0, 68.7, 66.7, 56.6, 27.7, 27.3, 23.4, 21.0, 20.9. <sup>19</sup>F-NMR (CDCl<sub>3</sub>, 282 MHz): δ -65.2. ESI-HRMS: Calcd for [C<sub>26</sub>H<sub>32</sub>F<sub>3</sub>N<sub>3</sub>O<sub>8</sub>Si + Na]<sup>+</sup>: 622.1808; Found m/z: 622.1812.

**6,8-Difluoro-4-trifluoromethylumbelliferyl 2-azido-2-deoxy-3-O-acetyl-4,6-O-di-*tert*-butylsilylene-α-D-galactopyranoside (15i):** See general procedure B. The resulting residue was purified by flash column chromatography (15:1 petroleum ether-EtOAc) to afford **15i** as a white solid (45%). <sup>1</sup>H NMR (CDCl<sub>3</sub>, 400 MHz): δ 7.32 (d, 1 H,  $J_{H,F}$  10.4 Hz, Ar-H), 6.85 (s, 1 H, Ar-H), 5.73 (d, 1 H,  $J_{1,2}$  3.2 Hz, H-1), 5.32 (dd, 1H,  $J_{3,4}$  2.8 Hz,  $J_{2,3}$  11.2 Hz, H-3), 4.85 (d, 1 H, H-4), 4.30 (d, 1 H,  $J_{6a,6b}$  13.2 Hz, H-6a), 4.25 (brs, 1 H, H-5), 4.13 (dd, 1 H, H-2), 4.09 (d, 1 H, H-6b), 2.21 (s, 3 H, CH<sub>3</sub>CO), 1.03 (s, 9 H), 1.01 (s, 9 H). <sup>13</sup>C NMR (CDCl<sub>3</sub>, 100 MHz): δ 170.5, 156.8, 152.4 (dd,  $J_{C,F}$  4.0 Hz & 246.0 Hz), 144.4 (dd,  $J_{C,F}$  5.0 Hz & 254.0 Hz), 140.4 (m, 2 C), 136.7 (dd,  $J_{C,F}$  12.0 Hz & 16.0 Hz), 121.1 (q,  $J_{C,F}$  274.0 Hz), 116.9 (q,  $J_{C,F}$  6.0 Hz), 110.2 (d,  $J_{C,F}$  11.0 Hz), 107.2 (d,  $J_{C,F}$  23.0 Hz), 102.3, 70.9, 70.1, 69.4, 66.6, 57.0, 27.7, 27.3, 23.4, 21.0, 20.8. <sup>19</sup>F-NMR (CDCl<sub>3</sub>, 282 MHz): δ -

65.5, 129.4 (d, J 2.5 Hz), -143.7 (d). ESI-HRMS: Calcd for  $[\text{C}_{26}\text{H}_{30}\text{F}_5\text{N}_3\text{O}_8\text{Si} + \text{Na}]^+$ : 658.1620; Found m/z: 658.1623.

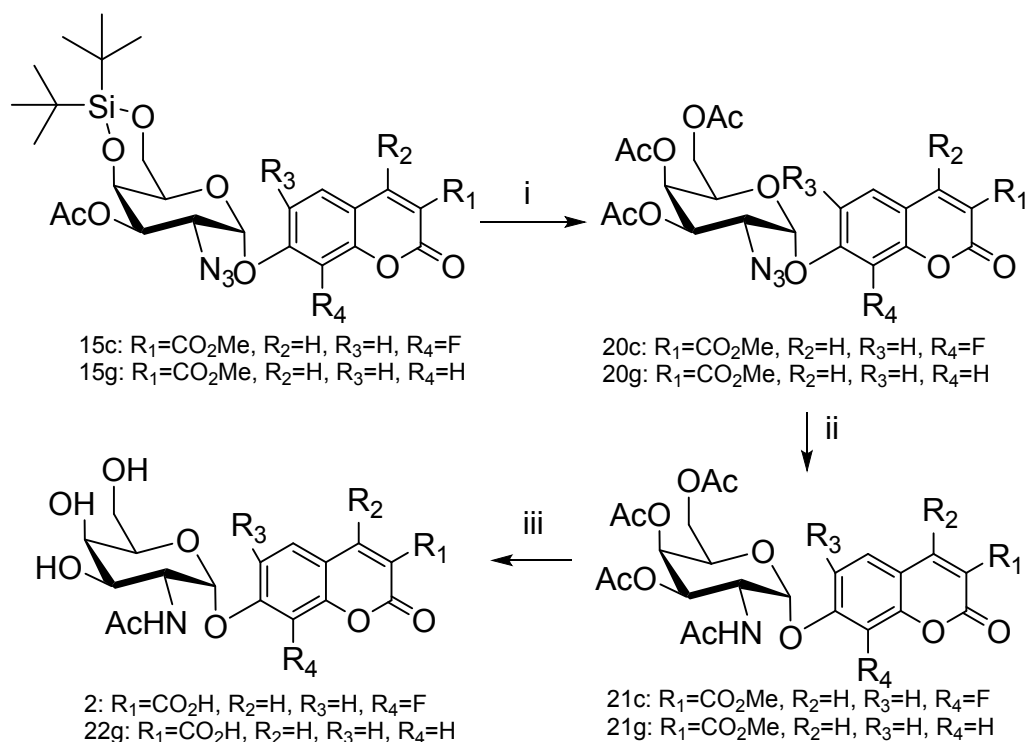

**Scheme S5.** Reagents and conditions: i). THF, AcOH, TBAF, rt; Pyridine, Ac<sub>2</sub>O, rt, **20c**: 65%; **20g**: 66%. ii). THF, H<sub>2</sub>O, Ph<sub>3</sub>P, silica gel, 50°C; Pyridine, Ac<sub>2</sub>O, rt; **21c**: 72%; **21g**: 67%. iii). MeOH, Na, rt; THF, H<sub>2</sub>O, LiOH, 0°C; **2**: 69%; **22g**: 71%.

Having demonstrated the utility of our synthetic approach for  $\alpha$ -GalNAc glycosylation of coumarin derivatives, we carried two of the glycosides through the deprotection steps to assess the suitability of this approach and to provide fully deprotected substrate for testing within droplets (Scheme S5).

Treatment of the glycosides **15c** and **15g** with tetrabutylammonium fluoride removed the silyl protecting group,<sup>16,25</sup> after which the free hydroxyls were directly acetylated using acetic anhydride in pyridine to yield the per-O-acetylated azido galactosides (**20c** and **20g**). Reduction of the azide with triphenyl phosphine and direct acetylation gave the 2-acetamido sugars (**21c** and **21g**).<sup>26–28</sup> Final deprotection was achieved by use of sodium methoxide in dry methanol to remove the O-acetates, then hydrolysis with 1 M LiOH in water at 0°C to remove the methyl ester.<sup>29</sup> When hydrolysis was complete the solvent was evaporated under reduced pressure, then the residue was re-dissolved in water, Amberlite resin was added and stirred for 0.5 h. After filtration, the filtrate was loaded on a Sep-Pak, eluted with water and water/acetonitrile then concentrated by evaporating under reduced pressure. The solid obtained was redissolved in water and lyophilized to afford **2** and **22g** as solid products.

### 3-(Carboxyl methyl ester)-8-fluoroumbelliferyl 2-azido-2-deoxy-3,4,6-tri-O-acetyl- $\alpha$ -D-

**galactopyranoside (20c):** To a solution of **15c** (230 mg, 0.379 mmol) in anhydrous THF (6 mL) were added AcOH (114  $\mu$ L) and TBAF (1 M in THF, 1.17 mL), and the reaction mixture was stirred overnight at room temperature under N<sub>2</sub>. After evaporation, the resulting residue was purified by flash column chromatography (2:3 DCM-EtOAc) to afford the intermediate diol. To the diol were added pyridine (3

mL) and Ac<sub>2</sub>O (2 mL), and the reaction mixture was stirred overnight at room temperature. Pyridine was removed by evaporation. To the resulting residue was added water (10 mL) and the mixture was stirred for 0.5 h at room temperature to quench the reaction, and then extracted with EtOAc (20 mL x 3). The organic phase was washed with 1 M HCl (30 mL), saturated NaHCO<sub>3</sub> (2 x 30 mL) and brine (30 mL), dried over MgSO<sub>4</sub>, filtered and concentrated. The resulting residue was purified by flash column chromatography (3:2 & 1:1 petroleum ether-EtOAc) to afford the product **20c** as a slightly yellow foam (65%). <sup>1</sup>H NMR (CDCl<sub>3</sub>, 400 MHz): δ 8.51 (s, 1 H, Ar-H), 7.37 (d, 1 H, Ar-H), 7.19 (dd, 1 H, J 6.4 Hz & 8.8 Hz, Ar-H), 5.73 (d, 1 H, J<sub>1,2</sub> 3.6 Hz, H-1), 5.52 (m, 2H, H-3 & H-4), 4.38 (m, 1 H, H-5), 4.09 (dd, 1 H, J<sub>5,6a</sub> 6.4 Hz, J<sub>6a,6b</sub> 11.2 Hz, H-6a), 4.04 (dd, 1 H, J<sub>5,6b</sub> 6.8 Hz, H-6b), 3.96 (dd, 1 H, J<sub>2,3</sub> 11.4 Hz, H-2), 3.91 (s, 3 H, OCH<sub>3</sub>), 2.15 (s, 3 H, CH<sub>3</sub>CO), 2.07 (s, 3 H, CH<sub>3</sub>CO), 1.93 (s, 3 H, CH<sub>3</sub>CO). <sup>13</sup>C NMR (CDCl<sub>3</sub>, 100 MHz): δ 170.3, 170.0, 169.8, 163.5, 155.2, 148.7 (d, J<sub>C,F</sub> 8.0 Hz), 148.6 (d, J<sub>C,F</sub> 2.0 Hz), 144.6 (d, J<sub>C,F</sub> 9.0 Hz), 140.3 (d, J<sub>C,F</sub> 253.0 Hz), 124.9 (d, J<sub>C,F</sub> 4.0 Hz), 116.7, 114.9, 114.3, 98.6, 68.6, 68.3, 67.2, 61.4, 57.3, 53.1, 20.71, 20.68, 20.66. <sup>19</sup>F-NMR (CDCl<sub>3</sub>, 282 MHz): δ -150.7 (s). ESI-HRMS: Calcd for [C<sub>23</sub>H<sub>22</sub>FN<sub>3</sub>O<sub>12</sub> + Na]<sup>+</sup>: 574.1085; Found m/z: 574.1085.

**3-(Carboxyl methyl ester)-umbelliferyl 2-azido-2-deoxy-3,4,6-tri-O-acetyl-α-D-galactopyranoside (20g):**

See the preparation of compound **20c**. The resulting residue was purified by flash column chromatography (3:2 petroleum ether-EtOAc) to afford the product **20g** as a syrup (66%). <sup>1</sup>H NMR (CDCl<sub>3</sub>, 400 MHz): δ 8.52 (s, 1 H, Ar-H), 7.55 (d, 1 H, J 8.4 Hz, Ar-H), 7.10 (d, 1 H, J 2.0 Hz, Ar-H), 7.04 (dd, 1 H, Ar-H), 5.72 (d, 1 H, J<sub>1,2</sub> 3.2 Hz, H-1), 5.52 (m, 2H, H-3 & H-4), 4.24 (m, 1 H, H-5), 4.09 (dd, 1 H, J<sub>5,6a</sub> 5.6 Hz, J<sub>6a,6b</sub> 11.6 Hz, H-6a), 4.05 (dd, 1 H, J<sub>5,6b</sub> 7.2 Hz, H-6b), 3.91 (s, 3 H, OCH<sub>3</sub>), 3.90 (dd, 1 H, J<sub>2,3</sub> 10.8 Hz, H-2), 2.16 (s, 3 H, CH<sub>3</sub>CO), 2.07 (s, 3 H, CH<sub>3</sub>CO), 1.92 (s, 3 H, CH<sub>3</sub>CO). <sup>13</sup>C NMR (CDCl<sub>3</sub>, 100 MHz): δ 170.3, 170.0, 169.9, 163.9, 161.1, 157.1, 156.7, 149.1, 131.2, 115.5, 115.1, 113.5, 103.9, 97.2, 68.3, 68.2, 67.1, 57.2, 52.9, 20.73, 20.69, 20.6. ESI-HRMS: Calcd for [C<sub>23</sub>H<sub>23</sub>N<sub>3</sub>O<sub>12</sub> + Na]<sup>+</sup>: 556.1179; Found m/z: 556.1183.

**3-(Carboxyl methyl ester)-8-fluoroumbelliferyl 2-acetamido-2-deoxy-3,4,6-tri-O-acetyl-α-D-galactopyranoside (21c):**

A mixture of **20c** (149 mg, 0.27 mmol), THF (8 mL), H<sub>2</sub>O (2 mL), silica gel (50 mg) and Ph<sub>3</sub>P (99 mg, 0.38 mmol, 1.4 equiv) was stirred overnight at 50°C. After completion of the reaction, the reaction mixture was diluted with THF (10 mL), filtered through Celite and washed with DCM (20 mL). The solvents were evaporated and co-evaporated with toluene under reduced pressure, and the resulting residue was dried for 2 h under vacuum. To the residue were added pyridine (3 mL) and Ac<sub>2</sub>O (1 mL), and the mixture stirred overnight at room temperature. Pyridine was removed by evaporation. To the resulting residue was added water (10 mL) and the mixture stirred for 0.5 h at room temperature to quench the reaction, extracted with EtOAc (20 mL x 3). The organic phase was washed with 1 M HCl (30 mL), saturated NaHCO<sub>3</sub> (2 x 30 mL) and brine (30 mL), dried over MgSO<sub>4</sub>, filtered and concentrated. The crude material was purified by flash column chromatography (6:1 DCM-acetone) to afford **21c** as a white foam (72%). <sup>1</sup>H NMR (CDCl<sub>3</sub>, 400 MHz): δ 8.52 (s, 1 H, Ar-H), 7.37 (dd, 1 H, J 1.2 Hz & 8.8 Hz, Ar-H), 7.21 (dd, 1 H, Ar-H), 6.25 (d, J 8.8 Hz, NHAc), 5.73 (d, 1 H, J<sub>1,2</sub> 3.6 Hz, H-1), 5.50 (d, 1H, H-4), 5.40 (dd, 1 H, J<sub>2,3</sub> 11.6 Hz, J<sub>3,4</sub> 3.2 Hz, H-3), 4.78 (ddd, 1 H, H-2), 4.34 (m, 1 H, H-5), 4.13 (dd, 1 H, J<sub>5,6a</sub> 6.0 Hz, J<sub>6a,6b</sub> 10.8 Hz, H-6a), 4.06 (dd, 1 H, J<sub>5,6b</sub> 7.2 Hz, H-6b), 3.92 (s, 3 H, OCH<sub>3</sub>), 2.18 (s, 3 H, CH<sub>3</sub>CO), 2.07 (s, 3 H, CH<sub>3</sub>CO), 2.03 (s, 3 H, CH<sub>3</sub>CO), 1.95 (s, 3 H, CH<sub>3</sub>CO). <sup>13</sup>C NMR (CDCl<sub>3</sub>, 100 MHz): δ 171.0, 170.9, 170.4, 170.3, 163.4, 155.2, 149.2 (d, J<sub>C,F</sub> 8.0 Hz), 148.7, 144.4 (d, J<sub>C,F</sub> 9.0 Hz), 140.1 (d, J<sub>C,F</sub> 251.0 Hz), 125.0 (d, J<sub>C,F</sub> 5.0 Hz), 116.5, 114.6, 114.1, 98.6, 68.6, 68.3, 67.2, 61.4, 57.3, 53.1, 20.71, 20.68, 20.66. <sup>19</sup>F-NMR (CDCl<sub>3</sub>, 282 MHz): δ -153.0 (s). ESI-HRMS: Calcd for [C<sub>25</sub>H<sub>26</sub>FNO<sub>13</sub> + Na]<sup>+</sup>: 590.1286; Found m/z: 590.1289.

**3-(Carboxyl methyl ester)-umbelliferyl 2-azido-2-deoxy-3,4,6-tri-O-acetyl- $\alpha$ -D-galactopyranoside (21g):**

See the preparation of compound **21c**. The resulting residue was purified by flash column chromatography (1:4 petroleum ether-EtOAc) to afford **21g** as a white foam (67%).  $^1\text{H}$  NMR ( $\text{CDCl}_3$ , 400 MHz):  $\delta$  8.52 (s, 1 H, Ar-H), 7.55 (d, 1 H,  $J$  8.4 Hz, Ar-H), 7.10 (s, 1 H, Ar-H), 7.05 (d, 1 H, Ar-H), 6.11 (d,  $J$  9.2 Hz, NHAc), 5.74 (d, 1 H,  $J_{1,2}$  3.2 Hz, H-1), 5.44 (brs, 1H, H-4), 5.38 (dd, 1 H,  $J_{3,4}$  2.8 Hz,  $J_{2,3}$  11.2 Hz, H-3), 4.77 (ddd, 1 H, H-2), 4.19 (m, 1 H, H-5), 4.10 (dd, 1 H,  $J_{5,6a}$  6.0 Hz,  $J_{6a,6b}$  11.2 Hz, H-6a), 4.03 (dd, 1 H,  $J_{5,6b}$  7.2 Hz, H-6b), 3.91 (s, 3 H,  $\text{OCH}_3$ ), 2.17 (s, 3 H,  $\text{CH}_3\text{CO}$ ), 2.03 (s, 3 H,  $\text{CH}_3\text{CO}$ ), 1.98 (s, 3 H,  $\text{CH}_3\text{CO}$ ), 1.91 (s, 3 H,  $\text{CH}_3\text{CO}$ ).  $^{13}\text{C}$  NMR ( $\text{CDCl}_3$ , 100 MHz):  $\delta$  171.1, 170.6, 170.4, 170.3, 163.8, 161.4, 157.0, 156.8, 149.0, 131.2, 115.4, 114.2, 113.4, 104.4, 96.8, 68.2, 67.8, 67.0, 61.6, 52.9, 47.9, 23.3, 20.9, 20.8, 20.7. ESI-HRMS: Calcd for  $[\text{C}_{25}\text{H}_{27}\text{NO}_{13} + \text{H}]^+$ : 550.1561; Found  $m/z$ : 550.1558.

**3-Carboxy-8-fluoroumbelliferyl 2-acetamido-2-deoxy- $\alpha$ -D-galactopyranoside (2):** To a solution of **21c** (110 mg, 0.194 mmol) in anhydrous MeOH (10 mL) was added a catalytic amount of sodium, and the reaction mixture stirred for 3 h at room temperature under  $\text{N}_2$ . After completion, the reaction mixture was neutralized with Amberlite, filtered and washed with MeOH and concentrated. The methyl ester intermediate was purified by flash column chromatography (9:1 DCM-MeOH) to afford a white solid (76 mg). A solution of the white solid in THF (22 mL) and water (13 mL) was treated with 1 M LiOH (1 M, 0.65 mmol, 3.8 equiv) at  $0^\circ\text{C}$  overnight. After evaporation, the resulting solid was redissolved in water (5 mL) and neutralized with amberlite (IR-120 hydrogen form), filtered and concentrated. The crude product was redissolved in water, loaded on C18 Sep-Pak, eluted with water and water-acetonitrile. The acetonitrile was evaporated, and the aqueous solution was lyophilized to afford the desired product **2** (69%).  $^1\text{H}$  NMR ( $d_6$ -DMSO +  $\text{D}_2\text{O}$ , 400 MHz):  $\delta$  8.73 (s, 1 H, Ar-H), 7.67 (dd, 1 H,  $J$  1.6 Hz & 7.6 Hz, Ar-H), 7.32 (dd, 1 H, Ar-H), 5.71 (d, 1 H,  $J_{1,2}$  3.6 Hz, H-1), 4.39 (dd, 1 H,  $J_{2,3}$  11.2 Hz, H-2), 3.88 (dd, 1 H,  $J_{3,4}$  3.2 Hz, H-3), 3.84 (d, 1 H, H-4), 3.74 (m, 1 H, H-5), 3.52 (dd, 1 H,  $J_{5,6a}$  5.6 Hz,  $J_{6a,6b}$  10.8 Hz, H-6a), 3.39 (dd, 1 H,  $J_{5,6b}$  6.4 Hz, H-6b), 1.85 (s, 3 H,  $\text{CH}_3\text{CO}$ ).  $^{13}\text{C}$  NMR ( $d_6$ -DMSO +  $\text{D}_2\text{O}$ , 100 MHz):  $\delta$  170.9, 164.3, 156.2, 149.5 (d,  $J_{\text{C,F}}$  10.2 Hz), 149.2, 144.1 (d,  $J_{\text{C,F}}$  11.5 Hz), 139.7 (d,  $J_{\text{C,F}}$  329.5 Hz), 126.2 (d,  $J_{\text{C,F}}$  5.3 Hz), 116.4, 114.9, 114.4, 98.5, 73.7, 68.2, 67.3, 60.7, 50.0, 23.1.  $^{19}\text{F}$ -NMR ( $\text{D}_2\text{O}$ , 282 MHz):  $\delta$  -155.5 (s). ESI-HRMS: Calcd for  $[\text{C}_{18}\text{H}_{18}\text{FNO}_{10} + \text{Na}]^+$ : 450.0812; Found  $m/z$ : 450.0809.

**3-Carboxyumbelliferyl 2-acetamido-2-deoxy- $\alpha$ -D-galactopyranoside (22g):** See the preparation of compound **2**. The product was obtained as a white solid (71%).  $^1\text{H}$  NMR ( $\text{D}_2\text{O}$ , 400 MHz):  $\delta$  8.33 (s, 1 H, Ar-H), 7.48 (d, 1 H,  $J$  8.8 Hz, Ar-H), 7.03 (dd, 1 H, Ar-H), 6.94 d, 1 H,  $J$  2.0 Hz, Ar-H), 5.67 (d, 1 H,  $J_{1,2}$  3.2 Hz, H-1), 4.40 (dd, 1 H,  $J_{2,3}$  10.8 Hz, H-2), 4.16 (dd, 1 H,  $J_{3,4}$  3.2 Hz, H-3), 4.08 (d, 1 H, H-4), 3.99 (m, 1 H, H-5), 3.78 (dd, 1 H,  $J_{5,6a}$  8.0 Hz,  $J_{6a,6b}$  12.0 Hz, H-6a), 3.72 (dd, 1 H,  $J_{5,6b}$  4.4 Hz, H-6b), 2.08 (s, 3 H,  $\text{CH}_3\text{CO}$ ).  $^{13}\text{C}$  NMR ( $d_6$ -DMSO +  $\text{D}_2\text{O}$ , 100 MHz):  $\delta$  175.0, 167.4, 161.7, 161.2, 155.8, 149.3, 131.6, 115.28, 115.26, 113.3, 103.5, 96.4, 72.6, 68.5, 67.7, 61.3, 49.7, 22.2. ESI-HRMS: Calcd for  $[\text{C}_{18}\text{H}_{19}\text{NO}_{10} + \text{Na}]^+$ : 432.0907; Found  $m/z$ : 432.0900.

### Synthesis of fluorophores for Table 1:

Umbelliferone, methylumbelliferone and 4-(trifluoromethyl)-7-hydroxycoumarin (TFMU) were obtained from commercial vendors. All the rest of the fluorophores have been reported and were synthesized based on known procedures with the exception of Jericho Blue and 3-carboxy-8-chloroumbelliferone whose synthesis is reported here. We have reported the synthesis of 6-chloro-4-methylumbelliferone (6-CIMU) before<sup>33</sup>. The synthesis of 6-fluoro-4-methylumbelliferone (6-FMU), 6,8-difluoro-4-methylumbelliferone (6,8-F<sub>2</sub>MU, also known as Marina Blue), 6,8-difluoro-4-(trifluoromethyl)-umbelliferone (6,8-F<sub>2</sub>TFMU), 3-carboxyumbelliferone (3-CU) and 3-carboxy-6,8-difluoro-umbelliferone (known as Pacific Blue) is reported by Sun *et al*<sup>1</sup> and the synthesis of the 3-carboxy-6-chloro-umbelliferone (6-Cl-3-CU) is reported by Zhao *et al*<sup>34</sup>. In all cases, the synthesis is a condensation reaction of the appropriately substituted resorcinol. The methyl ester protected version of the carboxy containing fluorophores were prepared as reported for compound 10 above. A typical procedure is as follows:

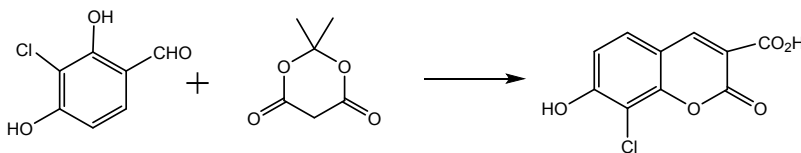

#### Scheme S6. Synthesis of 3-carboxy-8-chloroumbelliferone

A mixture of 3-chloro-2,4-dihydroxybenzaldehyde (1.02 g, 5.93 mmol), Meldrum's acid (0.934 g, 6.49 mmol, 1.1 equiv) and NH<sub>4</sub>OAc (0.139 g, 1.8 mmol) in water (28 mL) was stirred for 3 hours at room temperature. More Meldrum's acid (187 mg) and NH<sub>4</sub>OAc (28 mg) were added, and then the mixture was stirred overnight at the same condition. Then the reaction mixture was cooled with ice bath and to the mixture was added 2 M HCl (40 mL), and the mixture was stirred for 15 minutes at 0°C and left in a fridge overnight. The resulting solid was filtered and washed with cold water, dried under vacuum to afford 3-carboxy-8-chloroumbelliferone (or 3-carboxy-8-chloro-7-hydroxycoumarin) as a slightly yellow solid (1.382 g, 97%). <sup>1</sup>H NMR (d<sub>6</sub>-DMSO + D<sub>2</sub>O, 400 MHz): δ 8.67 (s, 1 H, Ar-H), 7.70 (d, 1 H, J 8.7 Hz), 7.01 (d, 1 H, Ar-H). <sup>13</sup>C NMR (d<sub>6</sub>-DMSO + D<sub>2</sub>O, 100 MHz): δ 163.9, 159.1, 156.4, 152.4, 149.4, 129.6, 113.3, 113.1, 111.4, 106.1. ESI-MS: Calcd for [C<sub>10</sub>H<sub>5</sub>ClO<sub>5</sub> – H]<sup>–</sup>: 239.0; Found m/z: 239.0.

## Testing the substrates for droplet-based screen

### Testing of substrates in water/oil droplets

Water-in-oil droplets were generated using a PDMS droplet generator chip [Darwin Microfluidics] in conjunction with a pressure pump system (OB1 MK3+, Elveflow) using the fluorinated oil HFE-7500 (3M) along with 1% (w/w) EA surfactant [Raindance Technologies]. Droplets (60  $\mu\text{m}$  diameter) were formed at a pressure of 200 mbar (oil) and 150 mbar (aqueous phase). For testing substrate leakage, the aqueous phase consisted of 0.5 X LB medium, 0.5 X PBS (pH 7.0) and 50  $\mu\text{M}$  of the appropriate fluorophore. Droplets without fluorophore were also prepared in the same manner. Upon production, droplets were collected in 1.5 mL microcentrifuge tubes. The droplets containing fluorophores were then mixed 1:1 with droplets prepared without fluorophore. After mixing, an aliquot of the droplets was flowed into a PMMA Fluidic 157 chip [Microfluidic ChipShop] for visualization. The droplets were then imaged using a Zeiss Axio Observer 7 microscope with a UV LED for excitation (EX: 385/30 nm, EM 425/29 nm) and consistent exposure settings across samples. The remaining mixed droplets were left overnight at room temperature before being imaged again under identical conditions. The resulting images of the droplets are shown in Figure S1 and show that the only those fluorophores with a free carboxylic acid group remain inside the droplets (3-CU and JB) while the rest diffuse out and result in almost homogeneously fluorescent droplets after overnight incubation.

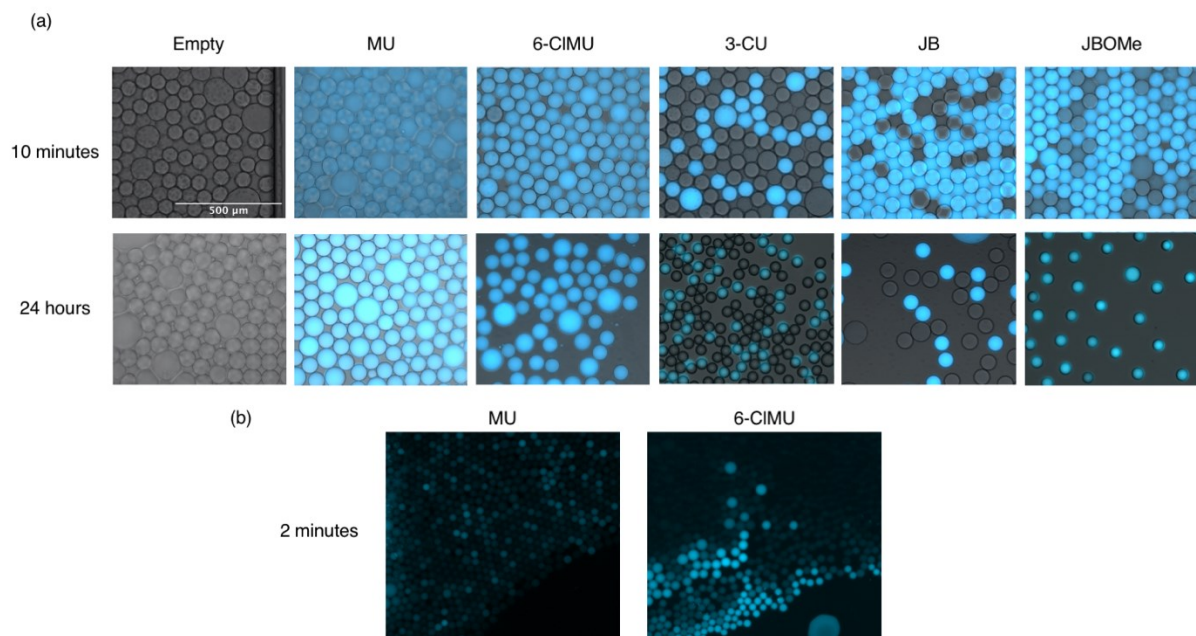

**Figure S1. Leakage of different fluorophores between water-in-perfluorinated oil droplets.** Aqueous droplets of 0.5X PBS and 0.5X LB +/- 50  $\mu\text{M}$  fluorophore were generated in an oil phase HFE-7500 + 1% EA using a PDMS chip. These fluorophore containing droplets were then mixed with 1:1 with empty droplets (produced under identical conditions but without fluorophore) and an aliquot imaged via fluorescence microscopy (ex: 385/30 nm, em: 425/29 nm). The remaining mixed droplets were then left for 24 hours at room temperature before imaging again. (b) Droplets containing MU and 6-CIMU had intermixed completely before the initial 10-minute time point. To identify leakage, droplets were mixed as before and then imaged immediately over the course of two minutes. Images shown are representative images from two independent trials. Note that the brightness of the images has been adjusted to account for less efficient excitation of the non-carboxylated coumarin derivatives and for consistency.

For the mock screen, the aqueous phase contained 0.5 x PBS buffer, 0.5 x LB medium, 100 µg/ml kanamycin, 100 µM IPTG, 0.25 mg/ml BSA with 50 µM **2** and 6,600,000 cfu/ml of *Escherichia coli*. Under the conditions described the setup produces approximately 8,800,000 droplets per 1 ml water phase, allowing the encapsulation of, on average, 0.75 bacteria per droplet. For this experiment, the *E. coli* sample contained a mixture of *E. coli* cells strain BL21(DE3) expressing the gene for the  $\alpha$ -N-acetyl-galactosaminidase EmGH109<sup>30</sup> encoded on a pET28a plasmid along with *E. coli* cells of the same strain containing the empty pET28a plasmid, in a ratio of 1:1000. After generation, the droplets were collected in a 2 ml plastic vial and incubated overnight at 37°C. These incubated droplets were then transferred to a glass microscope slide and imaged using the same Zeiss Microscope (EX: 385/30 nm, EM 425/29 nm). The results are shown in Figure 1 in the main paper and discussed there.

The mock assay using mineral oil was also performed in a relatively similar manner. However, in this case, a blood group cleaving exo- $\alpha$ -GalNAcase GH36 from *Collinsella sp.* in pUC19<sup>31</sup> was used as our model hit, while cells containing empty pUC19 were used as our background control. In brief, colonies were picked and grown overnight in starter cultures of LB + 100 µg/mL carbenicillin with shaking at 37°C. They were then diluted 1:1000 into LB + carbenicillin and grown at 37°C until OD<sub>600</sub> reached ~0.6. The concentration of cells was then set 125,000 cells/mL in varying ratios of GH36: empty pUC19 (from 1% positive – 50% positive) in an aqueous phase containing 25% Percoll, 0.25 mg/mL BSA, 50 µM IPTG, 100 µg/mL carbenicillin, 0.5 X PBS (pH 7.0), 0.5 X LB, and 50 µM **2**. Mineral oil with 4% ABIL EM90 (w/w) and 1% Brij L4 (w/w) was prepared for use as oil phase. The aqueous and oil phases were then flowed at 2 mL/h and 5 mL/h respectively into a PDMS chip made according to previous specifications<sup>32</sup> using syringe pumps [Harvard Apparatus]. Droplets produced had a diameter of 200 µm and therefore 230,000 droplets were produced from each mL of aqueous phase. Thus, on average ~0.5 cells were encapsulated in each droplet. The droplets were then collected on glass weigh boats and incubated at 37°C for 48 hours before imaging on a UV lamp. The results are shown in figure S2 and show that, similar to the experiment with fluorinated oil, the fluorescence signal of Jericho Blue is maintained inside the droplets even after long incubation time.

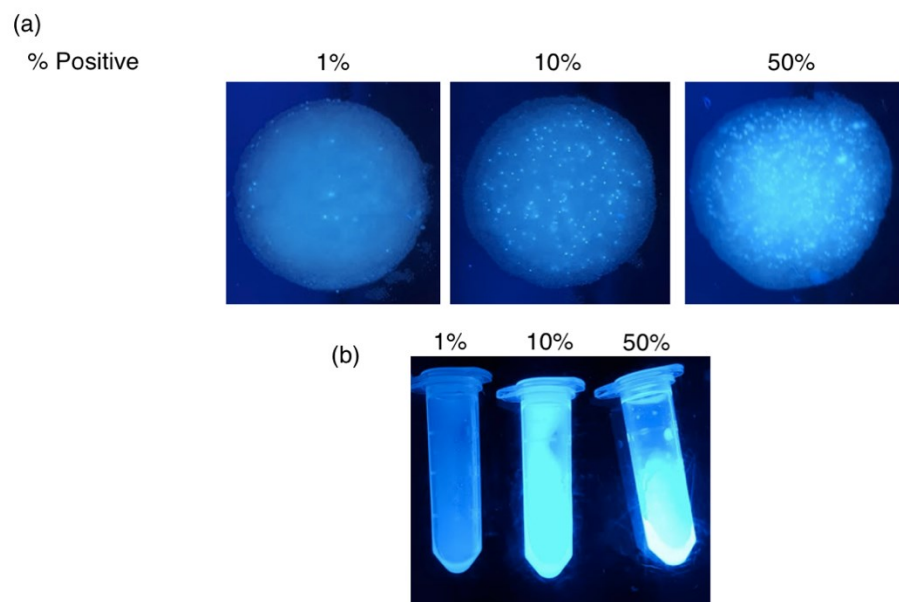

**Figure S2. Mock screening for  $\alpha$ -GalNAcases in water-in-mineral oil emulsions using Jericho Blue  $\alpha$ -D-GalNAc.** *E. coli* expressing a GH36  $\alpha$ -GalNAcase were mixed with *E. coli* carrying the equivalent empty pUC19 plasmid at varying ratios. Portions of these mixtures were then packaged into (a) water-in-mineral oil droplets or (b) left in a microcentrifuge tube at 37°C for 48 hours before visualization on a UV lamp table

## Determining the spectroscopic and chemical properties of coumarin derivatives

All the measurements were done using a Synergy H1 plate reader [Biotek] at room temperature and in clear flat-bottom 96-well plates [Corning]. To determine the excitation and emission wavelengths, a 100  $\mu\text{M}$  solution of each compound was prepared in phosphate buffer saline (PBS) buffered at  $\text{pH} = 7.4$ , containing 5% DMSO. To determine the  $\text{pK}_a$  values, 50  $\mu\text{M}$  solutions of each compound was prepared in a range of buffers with various  $\text{pH}$  values (citrate-phosphate buffer, glycylglycine buffer, and glycine-NaOH buffer), the absorbance of each solution was measured at the  $\lambda_{\text{max}}$  of the anionic form of each compound, and the  $\text{pK}_a$  of each compound was determined by fitting the data to a  $\text{pH}$  titration curve using GraFit 7.0 (Erithacus software limited; [www.erithacus.com/grafit](http://www.erithacus.com/grafit)). The graphs for all the compounds can be found below. It should be said that, we believe the major source of contradicting  $\text{pK}_a$  values found in literature is likely to be using fluorescent readings instead of absorbance. The linear range for fluorescent reads is substantially tighter compared to absorbance and this often means that using fluorescence leads to erroneous  $\text{pK}_a$  values, unless the measurements are done in very low concentrations of the fluorophores, where the fluorescence signal change in response to fluorophore concentration is in the linear range for all  $\text{pH}$  values.

The relative molar extinction coefficient and fluorescence brightness values were measured by making standard calibration curves. This was done by preparing a series of dilute solutions of each compound in PBS buffer,  $\text{pH} 7.4$  as well as 100 mM glycine-NaOH buffer  $\text{pH} 10$ , followed by measuring the fluorescence and absorbance of the solutions at the respective maximum wavelengths for each compound. The slope of the line in each case determines the molar fluorescence brightness and molar extinction coefficient respectively. Under the conditions tested, these solutions exhibit a linear response range of up to 50  $\mu\text{M}$  for absorbance and usually less than 5  $\mu\text{M}$  for fluorescence. Note that the reported fluorescence intensities here depend on both the inherent fluorescence as well as the  $\text{pK}_a$  of 7-hydroxy (where applicable) for each compound. Since the absolute fluorescence brightness values depend on the instrument parameters (such as slit width, gain, etc.), all the data is reported relative to fluorescein, as a common standard with known characteristics and a bright fluorescence.

**Table S1:** Extended spectroscopic and chemical properties of coumarin derivatives

| # | Compound                                                                            | Acronym                      | $\lambda_{\max}^a$<br>(nm) | $\lambda_{\text{ex}}^a$ (nm) | $\lambda_{\text{em}}^a$ (nm) | $\text{pK}_a^b$ | Rel. molar.<br>ex. coef.<br>@pH = 7.4 <sup>c</sup> | Rel. molar<br>fluor.<br>brightness<br>@pH = 7.4 <sup>c</sup> | Rel. molar<br>ex. coef.<br>@pH = 10 <sup>c</sup> | Rel. molar<br>fluor.<br>brightness<br>@pH = 10 <sup>c</sup> |
|---|-------------------------------------------------------------------------------------|------------------------------|----------------------------|------------------------------|------------------------------|-----------------|----------------------------------------------------|--------------------------------------------------------------|--------------------------------------------------|-------------------------------------------------------------|
| 1 | 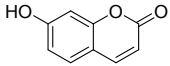   | <b>Umbelliferone</b>         | 362                        | 365 (360-365)                | 455 (450-455)                | 7.56 ± 0.06     | 0.19                                               | 0.082                                                        | 0.27                                             | 0.11                                                        |
| 2 |    | <b>MU</b>                    | 360                        | 365 (360-365)                | 450 (450-455)                | 7.67 ± 0.04     | 0.17                                               | 0.077                                                        | 0.27                                             | 0.13                                                        |
| 3 |    | <b>6-FMU</b>                 | 360                        | 360 (360-365)                | 450 (445-450)                | 6.28 ± 0.02     | 0.33                                               | 0.12                                                         | 0.34                                             | 0.12                                                        |
| 4 |    | <b>6,8-F<sub>2</sub>MU</b>   | 360                        | 360 (360-365)                | 450 (450-455)                | 4.90 ± 0.02     | 0.33                                               | 0.10                                                         | 0.30                                             | 0.10                                                        |
| 5 |    | <b>6-CIMU</b>                | 365                        | 365 (365-370)                | 450 (445-450)                | 6.14 ± 0.02     | 0.29                                               | 0.14                                                         | 0.29                                             | 0.14                                                        |
| 6 |    | <b>TFMU</b>                  | 385                        | 390 (390-395)                | 505 (500-505)                | 7.14 ± 0.03     | 0.19                                               | 0.049                                                        | 0.23                                             | 0.057                                                       |
| 7 |  | <b>6,8-F<sub>2</sub>TFMU</b> | 385                        | 390 (390-395)                | 505 (500-505)                | 4.30 ± 0.02     | 0.22                                               | 0.036                                                        | 0.20                                             | 0.033                                                       |
| 8 |  | <b>3-CU</b>                  | 390                        | 390 (390-395)                | 450 (450-455)                | 7.31 ± 0.03     | 0.30                                               | 0.26                                                         | 0.40                                             | 0.32                                                        |
| 9 |  | <b>3-CUOMe</b>               | 401                        | 400 (400-405)                | 450 (445-450)                | 6.50 ± 0.02     | 0.53                                               | 0.68                                                         | 0.54                                             | 0.70                                                        |

|    |                                                                                     |                     |     |               |               |                 |      |      |      |      |
|----|-------------------------------------------------------------------------------------|---------------------|-----|---------------|---------------|-----------------|------|------|------|------|
| 10 | 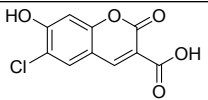   | <b>6-Cl-3-CU</b>    | 390 | 395 (390-395) | 450 (450-455) | $5.71 \pm 0.03$ | 0.37 | 0.35 | 0.37 | 0.34 |
| 11 |    | <b>6-Cl-3-CUOMe</b> | 405 | 410 (405-410) | 450 (445-450) | $4.84 \pm 0.02$ | 0.52 | 0.58 | 0.52 | 0.57 |
| 12 |    | <b>8-Cl-3-CU</b>    | 390 | 390 (390-395) | 450 (450-455) | $5.75 \pm 0.02$ | 0.38 | 0.32 | 0.39 | 0.31 |
| 13 |    | <b>8-Cl-3-CUOMe</b> | 404 | 410 (405-410) | 450 (450-455) | $4.87 \pm 0.02$ | 0.50 | 0.49 | 0.50 | 0.47 |
| 14 |    | <b>JB</b>           | 390 | 390 (390-395) | 450 (450-455) | $6.01 \pm 0.02$ | 0.36 | 0.26 | 0.36 | 0.25 |
| 15 |    | <b>JBOMe</b>        | 405 | 405 (405-410) | 450 (450-455) | $5.19 \pm 0.02$ | 0.53 | 0.45 | 0.51 | 0.43 |
| 16 |   | <b>PB</b>           | 390 | 390 (390-395) | 450 (450-455) | $4.66 \pm 0.05$ | 0.35 | 0.31 | 0.35 | 0.29 |
| 17 |  | <b>PBOMe</b>        | 405 | 405 (405-410) | 450 (450-455) | $3.73 \pm 0.03$ | 0.52 | 0.54 | 0.50 | 0.51 |

|    |                                                                                   |                    |     |               |     |             |   |   |   |   |
|----|-----------------------------------------------------------------------------------|--------------------|-----|---------------|-----|-------------|---|---|---|---|
| 18 | 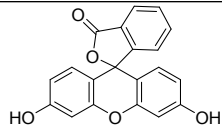 | <b>Fluorescein</b> | 491 | 484 (480-492) | 519 | 6.20 ± 0.03 | 1 | 1 | 1 | 1 |
|----|-----------------------------------------------------------------------------------|--------------------|-----|---------------|-----|-------------|---|---|---|---|

- a) Measured for 100  $\mu\text{M}$  solutions of each compounds in PBS buffer containing 5% DMSO. For excitation and emission wavelengths the values reported in parentheses are the range where the fluorescence signal is almost the same, as measured with the plate reader.
- b) pKa of the (first) ionizable phenol; calculated based on measured absorbance of 50  $\mu\text{M}$  solutions of the compounds in buffers with various pH values, each containing 5% DMSO.
- c) The slope of the graph of absorbance/fluorescence vs concentration of compound. Measured at maximum wavelengths of each compound in either PBS buffer or 100 mM glycine buffer. Values are reported relative to Fluorescein. An estimated 10% error should be considered for these values due to different purity grades of compounds from different sources.

## Plots of pKa determination

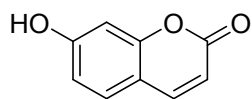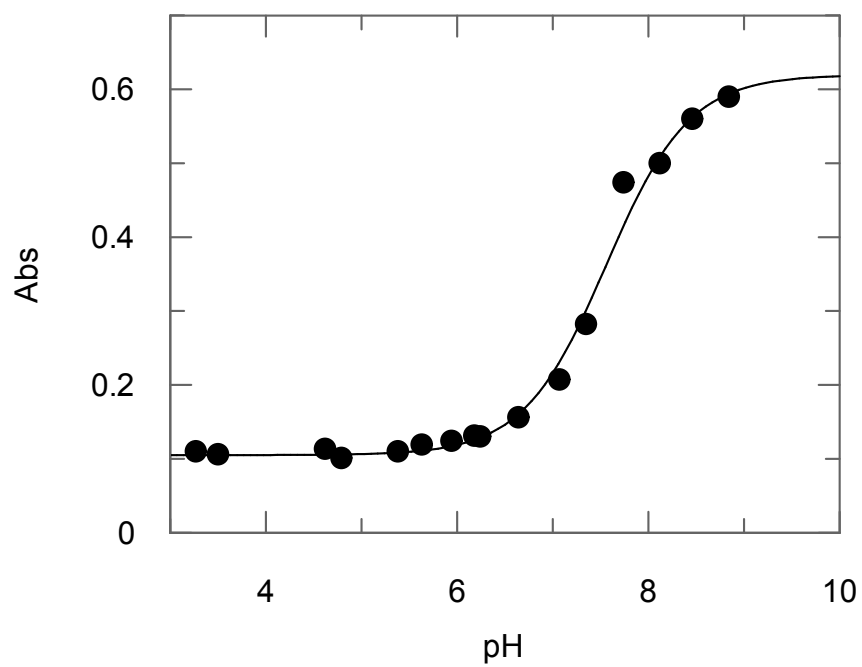

| Parameter | Value  | Std. Error |
|-----------|--------|------------|
| pKa       | 7.5603 | 0.0580     |
| Limit1    | 0.1050 | 0.0066     |
| Limit2    | 0.6195 | 0.0167     |

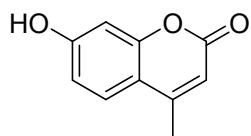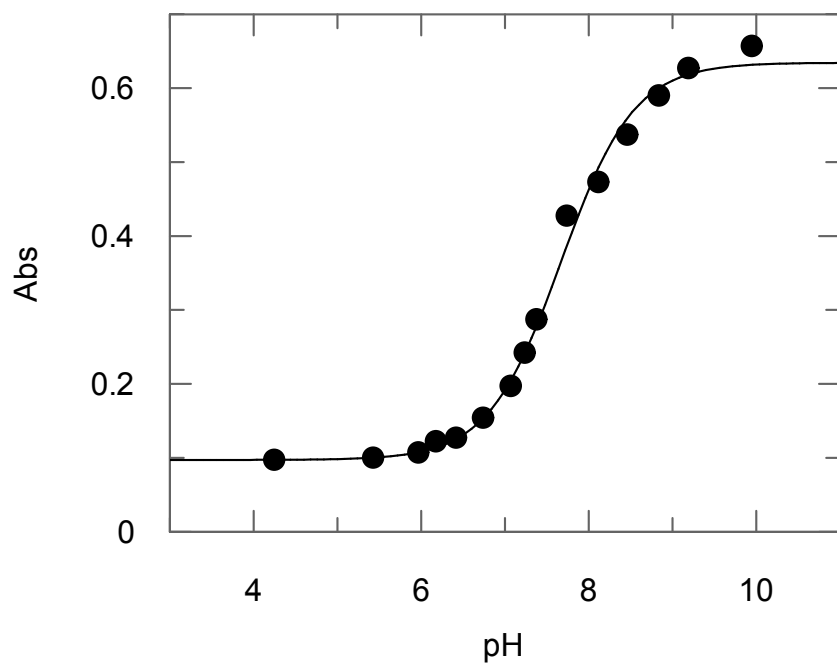

| Parameter | Value  | Std. Error |
|-----------|--------|------------|
| pKa       | 7.6729 | 0.0421     |
| Limit1    | 0.0971 | 0.0078     |
| Limit2    | 0.6344 | 0.0100     |

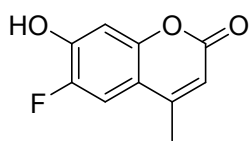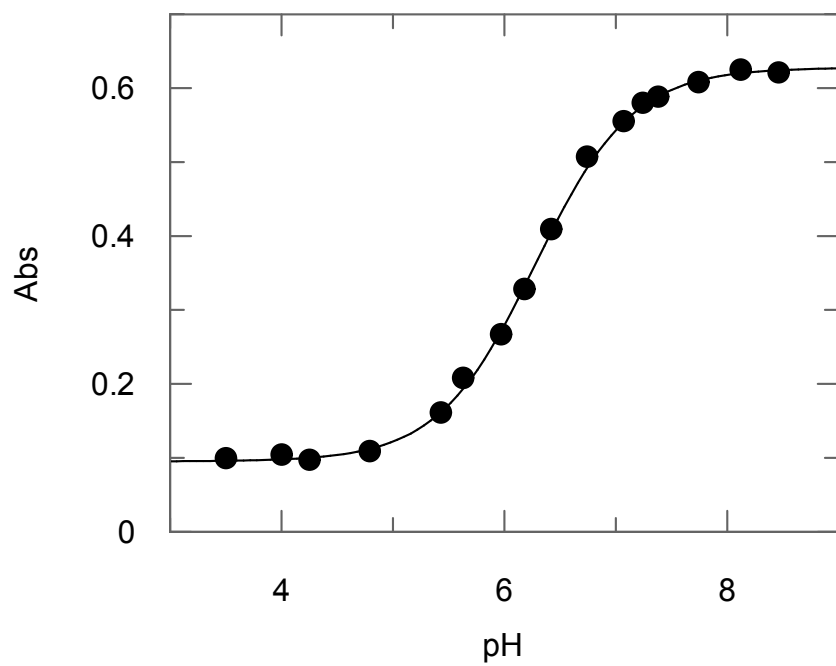

| Parameter | Value  | Std. Error |
|-----------|--------|------------|
| pKa       | 6.2773 | 0.0152     |
| Limit1    | 0.0951 | 0.0032     |
| Limit2    | 0.6277 | 0.0032     |

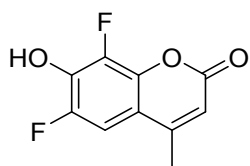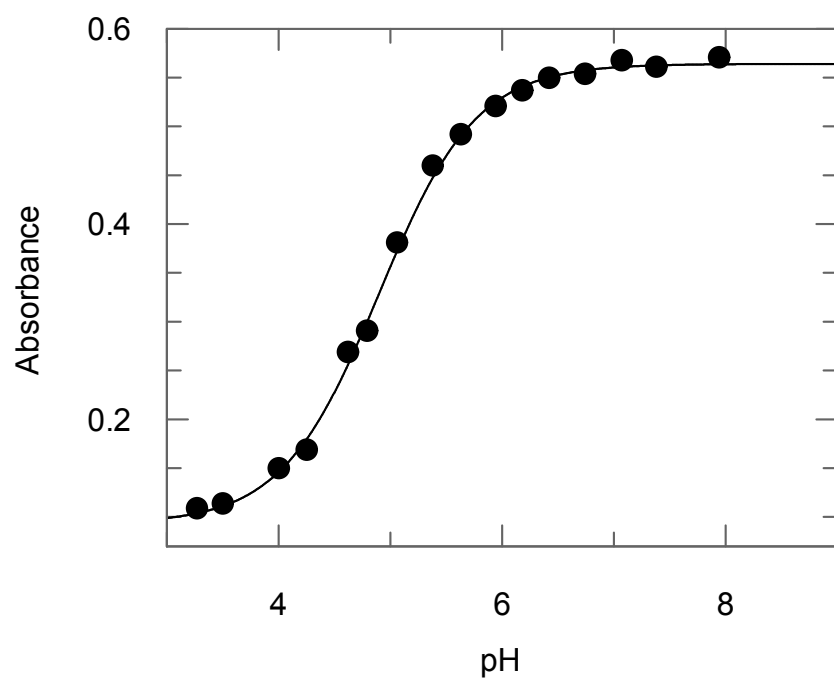

| Parameter | Value  | Std. Error |
|-----------|--------|------------|
| pKa       | 4.8984 | 0.0210     |
| Limit1    | 0.0930 | 0.0050     |
| Limit2    | 0.5640 | 0.0030     |

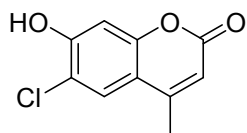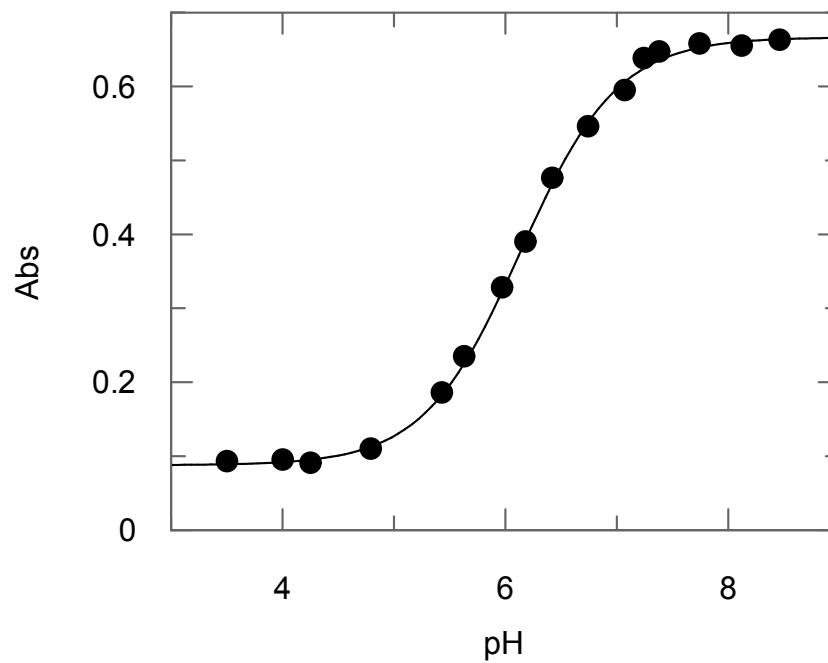

| Parameter | Value  | Std. Error |
|-----------|--------|------------|
| pKa       | 6.1381 | 0.0156     |
| Limit1    | 0.0877 | 0.0037     |
| Limit2    | 0.6666 | 0.0034     |

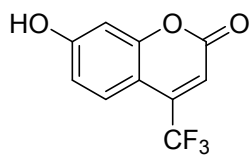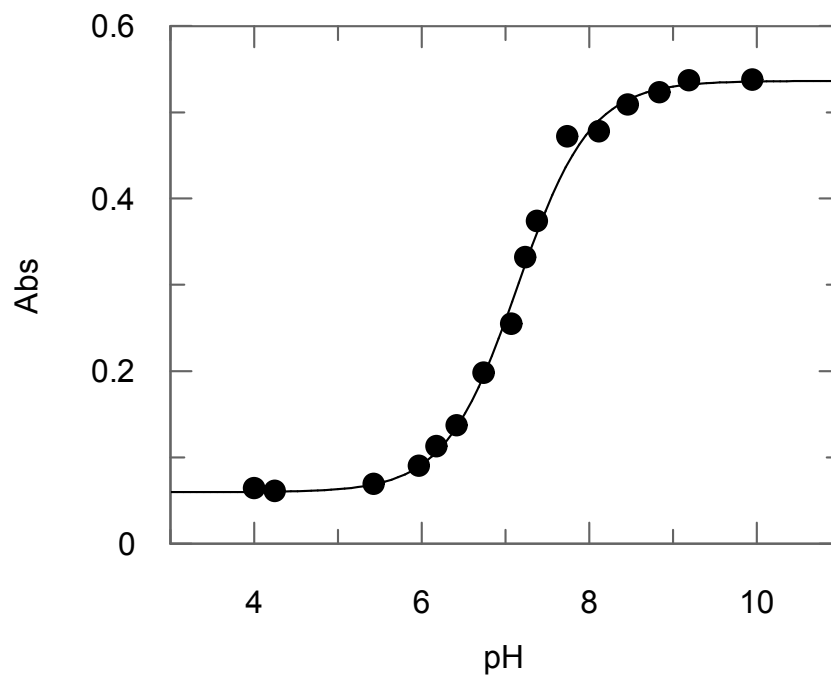

| Parameter | Value  | Std. Error |
|-----------|--------|------------|
| pKa       | 7.1443 | 0.0311     |
| Limit1    | 0.0596 | 0.0060     |
| Limit2    | 0.5364 | 0.0060     |

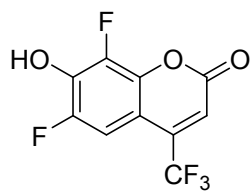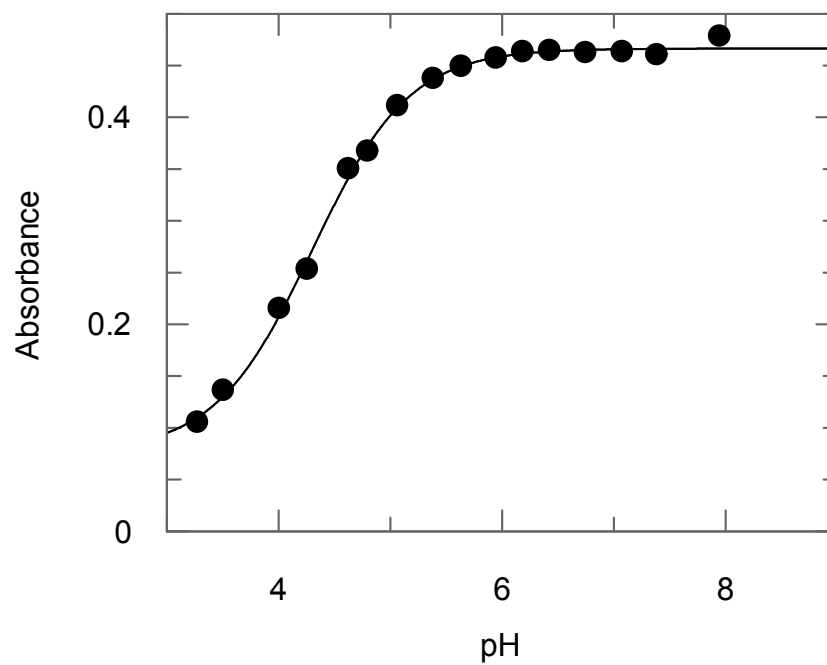

| Parameter | Value  | Std. Error |
|-----------|--------|------------|
| pKa       | 4.2998 | 0.0246     |
| Limit1    | 0.0764 | 0.0062     |
| Limit2    | 0.4664 | 0.0021     |

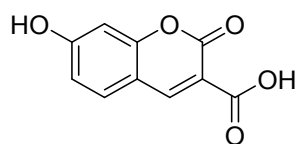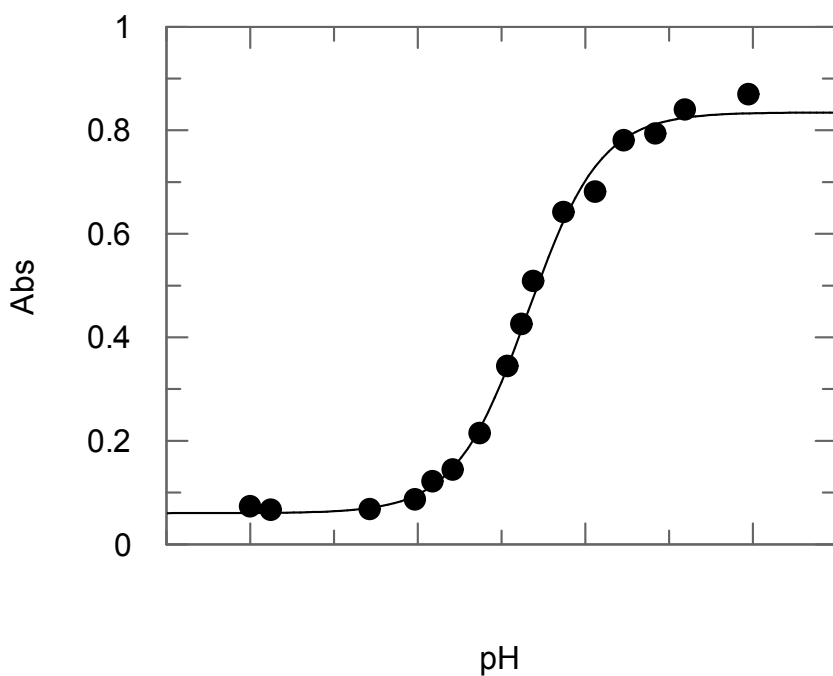

| Parameter | Value  | Std. Error |
|-----------|--------|------------|
| pKa       | 7.3136 | 0.0332     |
| Limit1    | 0.0601 | 0.0098     |
| Limit2    | 0.8345 | 0.0110     |

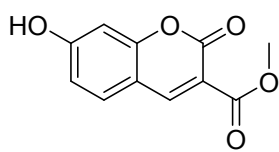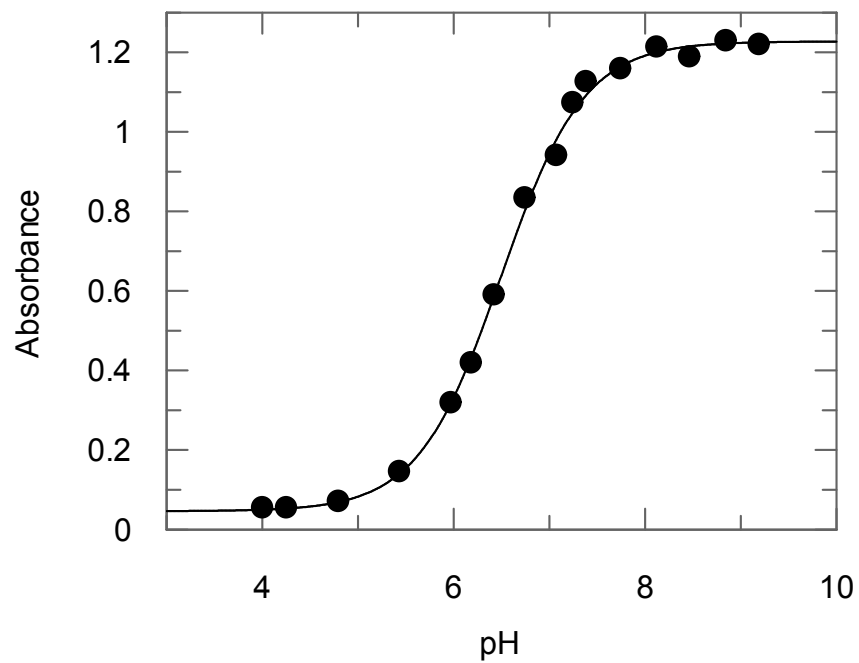

| Parameter | Value  | Std. Error |
|-----------|--------|------------|
| pKa       | 6.4967 | 0.0217     |
| Limit1    | 0.0462 | 0.0110     |
| Limit2    | 1.2273 | 0.0091     |

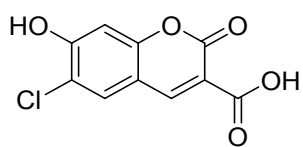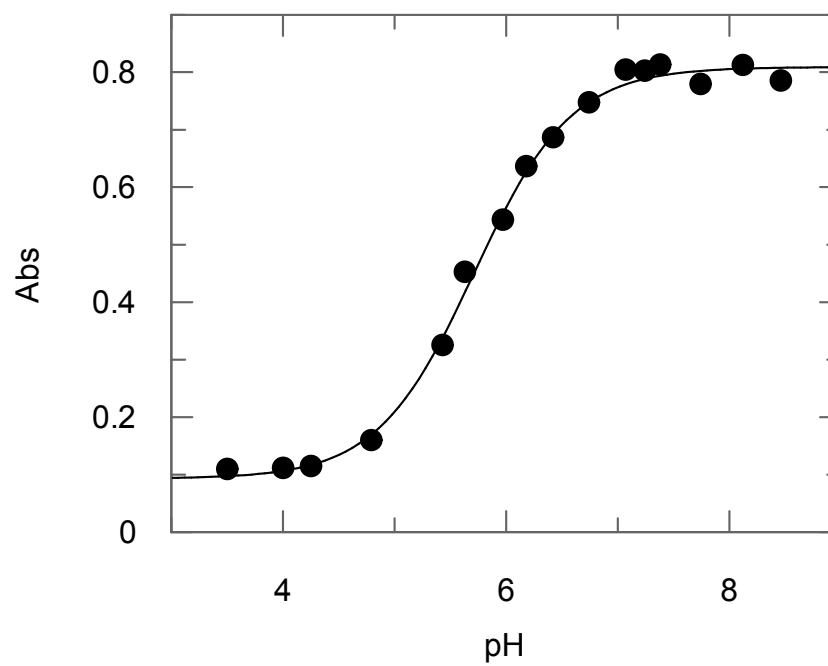

| Parameter | Value  | Std. Error |
|-----------|--------|------------|
| pKa       | 5.7140 | 0.0310     |
| Limit1    | 0.0927 | 0.0100     |
| Limit2    | 0.8090 | 0.0072     |

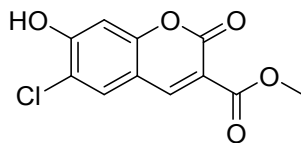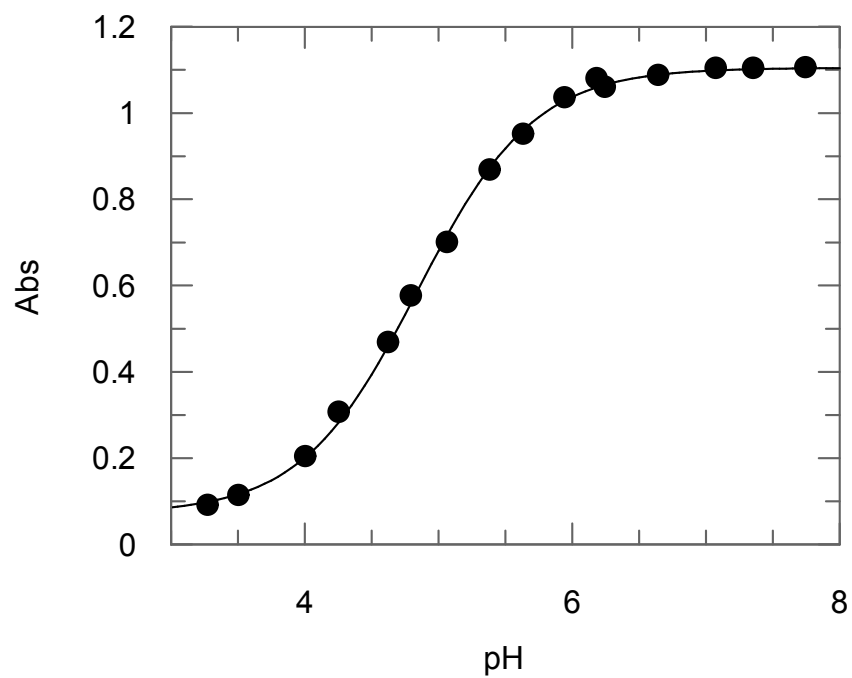

| Parameter | Value  | Std. Error |
|-----------|--------|------------|
| pKa       | 4.8440 | 0.0153     |
| Limit1    | 0.0711 | 0.0081     |
| Limit2    | 1.1048 | 0.0047     |

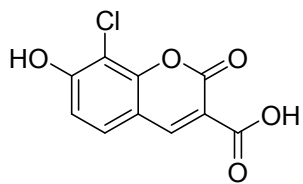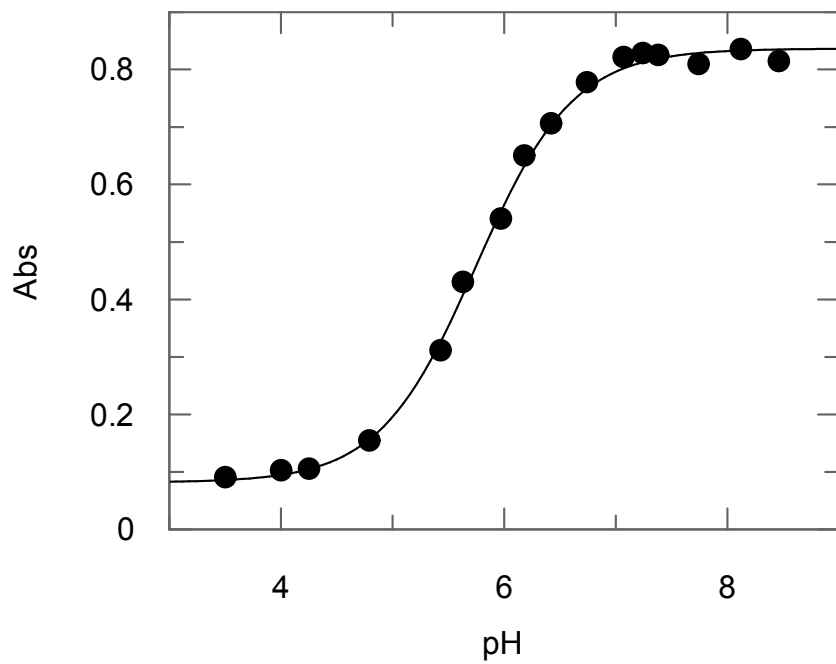

| Parameter | Value  | Std. Error |
|-----------|--------|------------|
| pKa       | 5.7503 | 0.0241     |
| Limit1    | 0.0814 | 0.0081     |
| Limit2    | 0.8363 | 0.0060     |

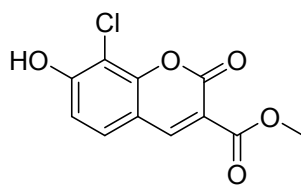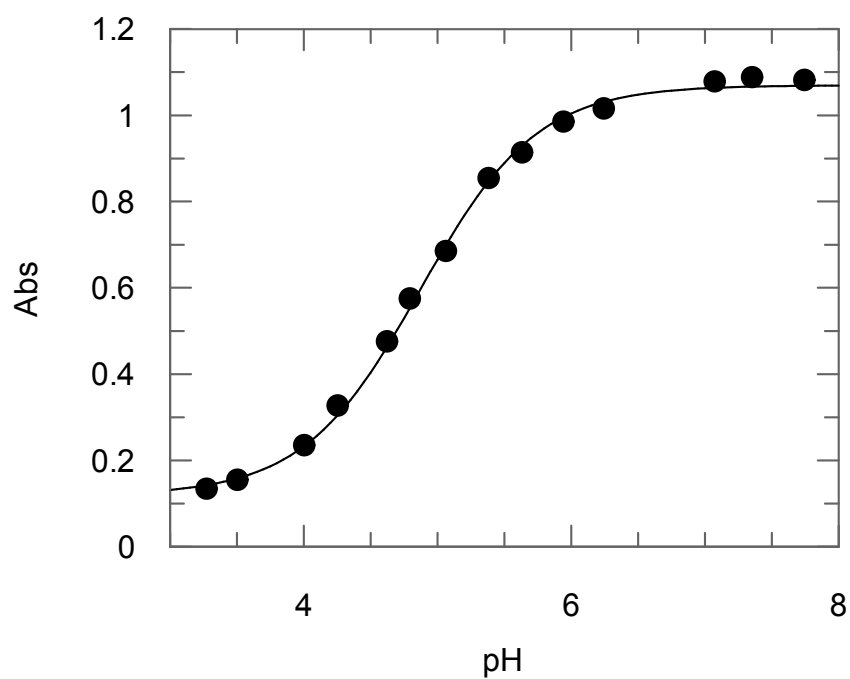

| Parameter | Value  | Std. Error |
|-----------|--------|------------|
| pKa       | 4.8689 | 0.0227     |
| Limit1    | 0.1188 | 0.0108     |
| Limit2    | 1.0696 | 0.0074     |

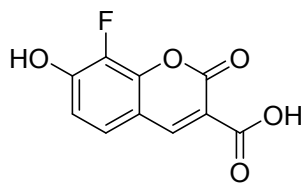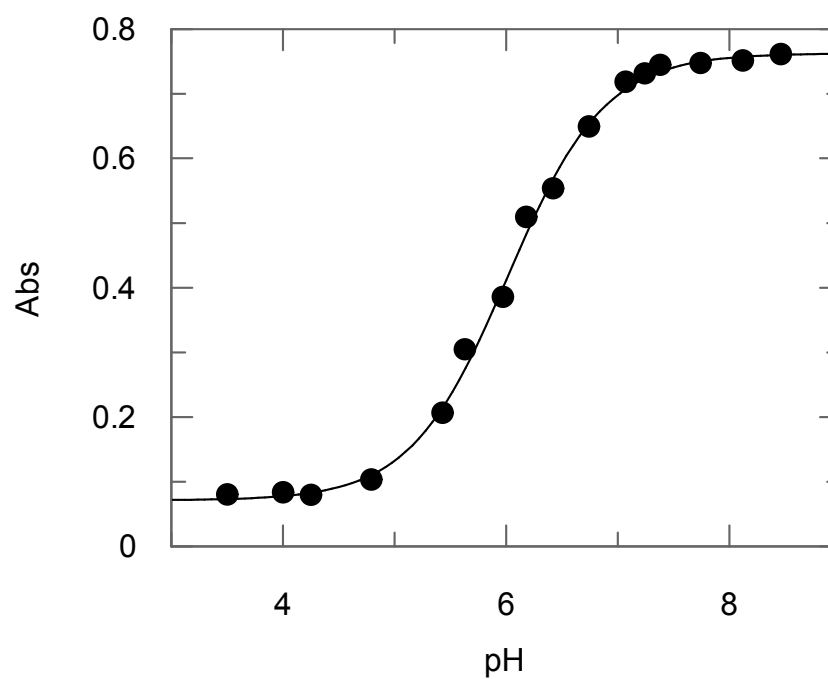

| Parameter | Value  | Std. Error |
|-----------|--------|------------|
| pKa       | 6.0136 | 0.0246     |
| Limit1    | 0.0710 | 0.0072     |
| Limit2    | 0.7624 | 0.0062     |

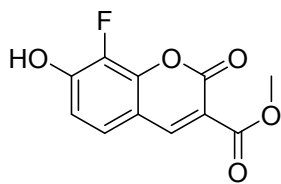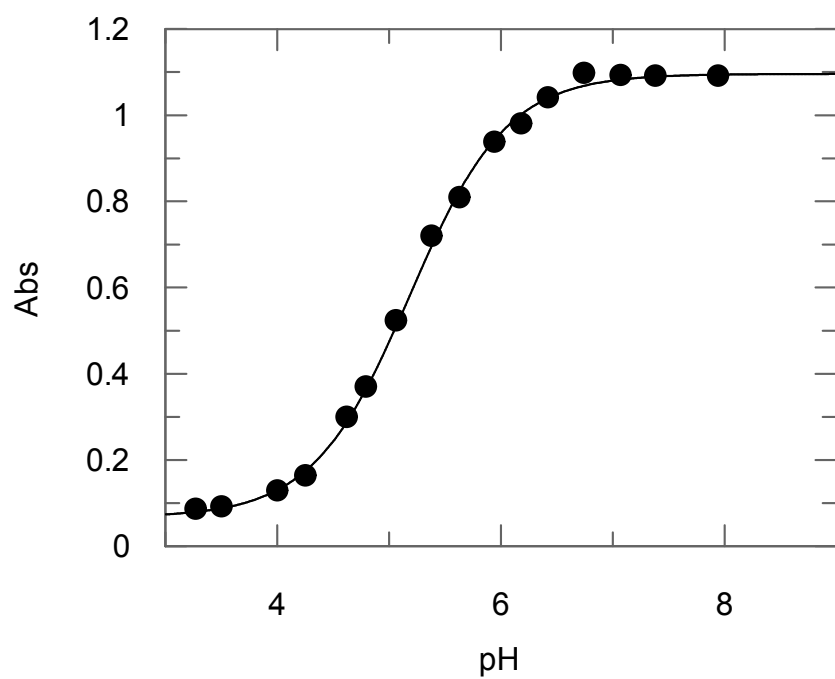

| Parameter | Value  | Std. Error |
|-----------|--------|------------|
| pKa       | 5.1855 | 0.0179     |
| Limit1    | 0.0668 | 0.0082     |
| Limit2    | 1.0959 | 0.0062     |

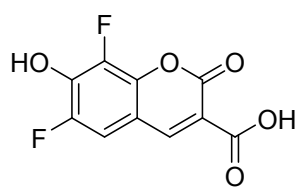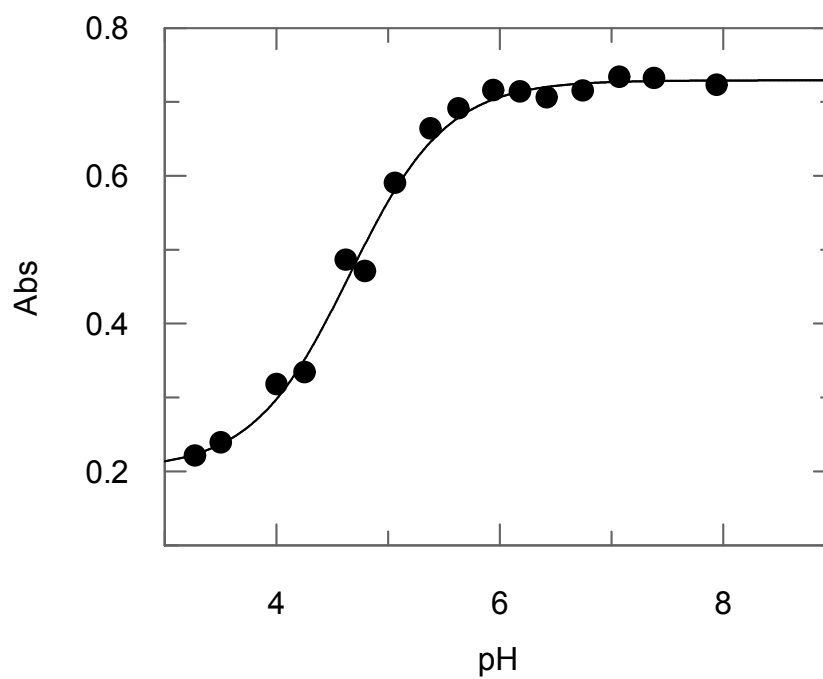

| Parameter | Value  | Std. Error |
|-----------|--------|------------|
| pKa       | 4.6556 | 0.0459     |
| Limit1    | 0.2022 | 0.0136     |
| Limit2    | 0.7292 | 0.0066     |

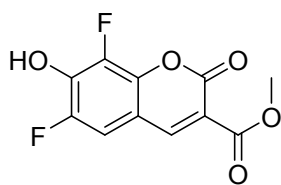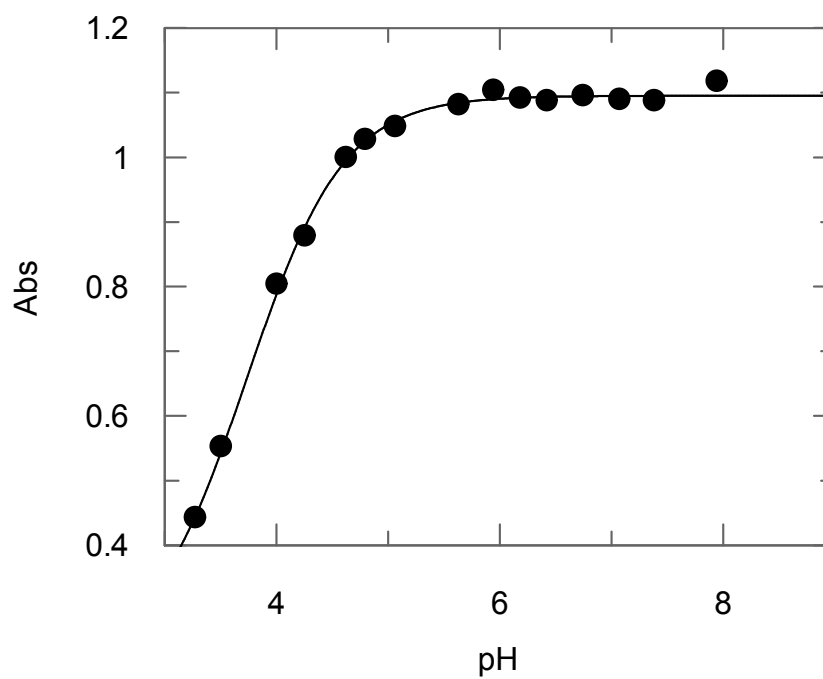

| Parameter | Value  | Std. Error |
|-----------|--------|------------|
| pKa       | 3.7344 | 0.0329     |
| Limit1    | 0.2192 | 0.0258     |
| Limit2    | 1.0953 | 0.0036     |

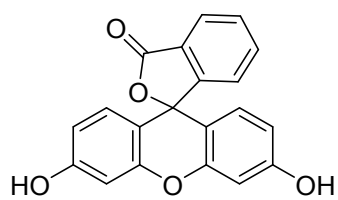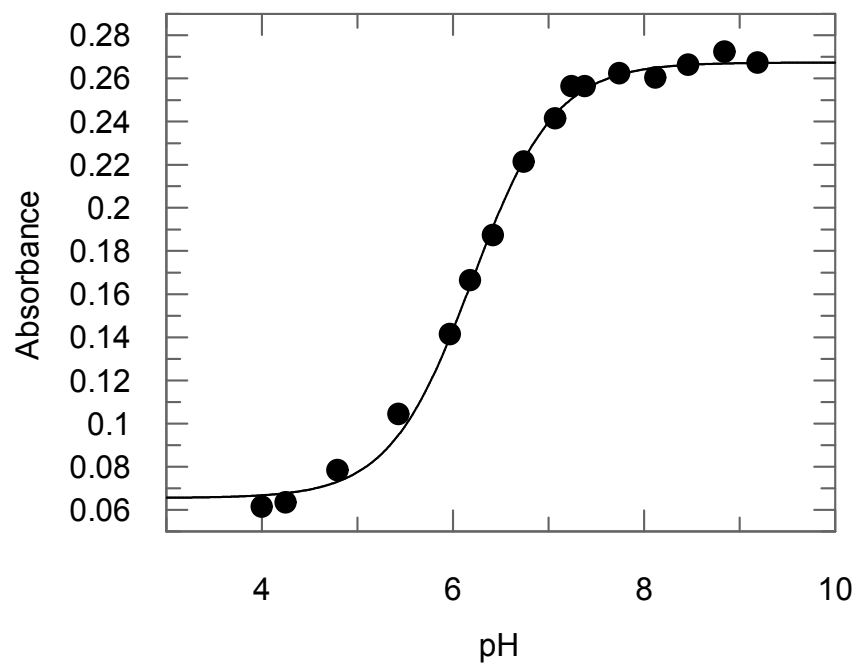

| Parameter | Value  | Std. Error |
|-----------|--------|------------|
| pKa       | 6.2024 | 0.0284     |
| Limit1    | 0.0654 | 0.0026     |
| Limit2    | 0.2674 | 0.0018     |

## References

- 1 W. C. Sun, K. R. Gee and R. P. Haugland, Synthesis of novel fluorinated coumarins: Excellent UV-light excitable fluorescent dyes, *Bioorganic Med. Chem. Lett.*, 1998, **8**, 3107–3110.
- 2 J. K. Kerkovius and F. Menard, A Practical Synthesis of 6,8-Difluoro-7-hydroxycoumarin Derivatives for Fluorescence Applications, *Synth.*, 2016, **48**, 1622–1629.
- 3 X. Fu, C. Albermann, J. Jiang, J. Liao, C. Zhang and J. S. Thorson, Antibiotic optimization via in vitro glycorandomization, *Nat. Biotechnol.*, 2003, **21**, 1467–1469.
- 4 H. Paulsen, Building units of oligosaccharides. XCI. Synthesis of disaccharides from L-glycero-D-manno-heptose and 2-amino-2-deoxy-D-glucose, *Liebigs Ann. der Chemie*, 1988, 1073–1078.
- 5 H. Paulsen, J. P. Lorentzen and W. Kutschker, Erprobte synthese von 2-azido-2-desoxy-d-mannose und 2-azido-2-desoxy-d-mannuronsäure als baustein zum aufbau von bakterien-polysaccharid-sequenzen, *Carbohydr. Res.*, 1985, **136**, 153–176.
- 6 M. Liu, V. G. Young, S. Lohani, D. Live and G. Barany, Syntheses of TN building blocks N $\alpha$ -(9-fluorenylmethoxycarbonyl)-O-(3,4,6-tri-O-acetyl-2-azido-2-deoxy- $\alpha$ -D- galactopyranosyl)-L-serine/L-threonine pentafluorophenyl esters: Comparison of protocols and elucidation of side reactions, *Carbohydr. Res.*, 2005, **340**, 1273–1285.
- 7 Y. Saito, T. Watanabe, H. Hashimoto and J. Yoshimura, Synthesis of N1-(p-glycosyloxycinnamoyl)spermidines, *Carbohydr. Res.*, 1987, **169**, 171–188.
- 8 J. K. Kerkovius and F. Menard, A Practical Synthesis of 6,8-Difluoro-7-hydroxycoumarin Derivatives for Fluorescence Applications, *Synth.*, 2016, **48**, 1622–1629.
- 9 M. M. Lee and B. R. Peterson, Quantification of Small Molecule–Protein Interactions using FRET between Tryptophan and the Pacific Blue Fluorophore, *ACS Omega*, 2016, **1**, 1266–1276.
- 10 H. M. Chen and S. G. Withers, Syntheses of the 3- and 4-thio analogues of 4-nitrophenyl 2-acetamido-2-deoxy- $\beta$ -d-gluco- and galactopyranoside, *Carbohydr. Res.*, 2007, **342**, 2212–2222.
- 11 T. Ren and L. Dexi, Synthesis of targetable cationic amphiphiles, *Tetrahedron Lett.*, 1999, **40**, 7621–7625.
- 12 U. Ellervik and G. Magnusson, A High Yielding Chemical Synthesis of Sialyl Lewis x Tetrasaccharide and Lewis x Trisaccharide; Examples of Regio-and Stereodifferentiated Glycosylations, , DOI:10.1021/jo981203x.
- 13 G. L. Xi and Z. Q. Liu, Coumarin-Fused Coumarin: Antioxidant Story from N, N -Dimethylamino and Hydroxyl Groups, *J. Agric. Food Chem.*, 2015, **63**, 3516–3523.
- 14 I. Sosič, M. Gobec, B. Brus, D. Knez, M. Živec, J. Konc, S. Lešnik, M. Ogrizek, A. Obreza, D. Žigon, D. Janežič, I. Mlinarič-Raščan and S. Gobec, Nonpeptidic Selective Inhibitors of the Chymotrypsin-Like ( $\beta$ 5 i) Subunit of the Immunoproteasome, *Angew. Chemie Int. Ed.*, 2016, **55**, 5745–5748.
- 15 V. Diemer, H. Chaumeil, A. Defoin, A. Fort, A. Boeglin and C. Carré, Syntheses of Sterically Hindered Pyridinium Phenoxides as Model Compounds in Nonlinear Optics, *European J. Org. Chem.*, 2006, **2006**, 2727–2738.

- 16 A. Imamura, H. Ando, H. Ishida and M. Kiso, Di-tert-butylsilylene-directed  $\alpha$ -selective synthesis of 4-methylumbelliferyl T-antigen, *Org. Lett.*, 2005, **7**, 4415–4418.
- 17 A. Imamura, H. Ando, S. Korogi, G. Tanabe, O. Muraoka, H. Ishida and M. Kiso, Di-tert-butylsilylene (DTBS) group-directed  $\alpha$ -selective galactosylation unaffected by C-2 participating functionalities, *Tetrahedron Lett.*, 2003, **44**, 6725–6728.
- 18 A. Imamura, A. Kimura, H. Ando, H. Ishida and M. Kiso, Extended Applications of Di-tert-butylsilylene-Directed  $\alpha$ -Predominant Galactosylation Compatible with C2-Participating Groups toward the Assembly of Various Glycosides, *Chem. - A Eur. J.*, 2006, **12**, 8862–8870.
- 19 S. Tejera, R. L. Dorta and J. T. Vázquez, Study of aryl triazoles for absolute configuration determination, *Tetrahedron: Asymmetry*, 2016, **27**, 896–909.
- 20 J. Ding, H. Su, F. Wang and T. Chu, A pre-targeting strategy for imaging glucose metabolism using technetium-99m labelled dibenzocyclooctyne derivative, *Bioorg. Med. Chem. Lett.*, 2019, **29**, 1791–1798.
- 21 M. Ogunsina, P. Samadder, T. Idowu, G. Arthur and F. Schweizer, Design, synthesis and evaluation of cytotoxic properties of bisamino glucosylated antitumor ether lipids against cancer cells and cancer stem cells, *Medchemcomm*, 2016, **7**, 2100–2110.
- 22 A. Titz, Z. Radic, O. Schwardt and B. Ernst, A safe and convenient method for the preparation of triflyl azide, and its use in diazo transfer reactions to primary amines, *Tetrahedron Lett.*, 2006, **47**, 2383–2385.
- 23 Z. Zhou, W. Ding, C. Li and Z. Wu, Synthesis and immunological study of a wall teichoic acid-based vaccine against *E. faecium* U0317, *J. Carbohydr. Chem.*, 2017, **36**, 205–219.
- 24 H. M. Chen and S. G. Withers, Synthesis of azido-deoxy and amino-deoxy glycosides and glycosyl fluorides for screening of glycosidase libraries and assembly of substituted glycosides, *Carbohydr. Res.*, 2018, **467**, 33–44.
- 25 N. Hada, J. Oka, K. Hakamata, K. Yamamoto and T. Takeda, Synthesis of neutral glycosphingolipids from Zygomycetes, *Carbohydr. Res.*, 2008, **343**, 2315–2324.
- 26 P. Krist, Synthesis of 4-Nitrophenyl 2-Acetamido-2-deoxy- $\beta$ -D-mannopyranoside and 4-Nitrophenyl 2-Acetamido-2-deoxy- $\alpha$ -D-mannopyranoside, *Collect. Czechoslov. Chem. Commun.*, 2003, **68**, 801–811.
- 27 H. M. Chen and S. G. Withers, Syntheses of p-nitrophenyl 3- and 4-thio- $\beta$ -D-glycopyranosides, *Carbohydr. Res.*, 2010, **345**, 2596–2604.
- 28 J. Zhang, S. Singh, R. R. Hughes, M. Zhou, M. Sunkara, A. J. Morris and J. S. Thorson, A Simple Strategy for Glycosyltransferase-Catalyzed Aminosugar Nucleotide Synthesis, *ChemBioChem*, 2014, **15**, 647–651.
- 29 M. D. Mertens and M. Gütschow, Clickable coumarins as fluorescent labels for amino acids, *Synth.*, 2014, **46**, 2191–2200.
- 30 Q. P. Liu, G. Sulzenbacher, H. Yuan, E. P. Bennett, G. Pietz, K. Saunders, J. Spence, E. Nudelman, S. B. Lavery, T. White, J. M. Neveu, W. S. Lane, Y. Bourne, M. L. Olsson, B. Henrissat and H. Clausen, Bacterial glycosidases for the production of universal red blood cells, *Nat. Biotechnol.*, 2007, **25**,

454–464.

- 31 P. Rahfeld, L. Sim, H. Moon, I. Constantinescu, C. Morgan-Lang, S. J. Hallam, J. N. Kizhakkedathu and S. G. Withers, An enzymatic pathway in the human gut microbiome that converts A to universal O type blood, *Nat. Microbiol.*, 2019, **4**, 1475–1485.
- 32 Y. Zhao, H. Cao, T. Beebe, H. Zhang, X. Zhang, H. Chang, O. Scremin, C.-L. Lien, Y.-C. Tai and T. K. Hsiai, Dry-contact microelectrode membranes for wireless detection of electrical phenotypes in neonatal mouse hearts, *Biomed. Microdevices*, 2015, **17**, 40.
- 33 H.-M. Chen, Z. Armstrong, S. J. Hallam and S. G. Withers, Synthesis and evaluation of a series of 6-chloro-4-methylumbelliferyl glycosides as fluorogenic reagents for screening metagenomic libraries for glycosidase activity, *Carbohydr. Res.*, 2016, **421**, 33–39.
- 34 Y. R. Zhao, Q. Zheng, K. Dakin, K. Xu, M. L. Martinez and W. H. Li, New Caged Coumarin Fluorophores with Extraordinary Uncaging Cross Sections Suitable for Biological Imaging Applications, *J. Am. Chem. Soc.*, 2004, **126**, 4653–4663.

## NMR spectra

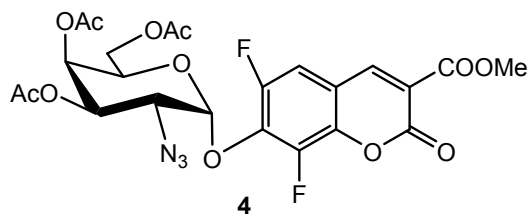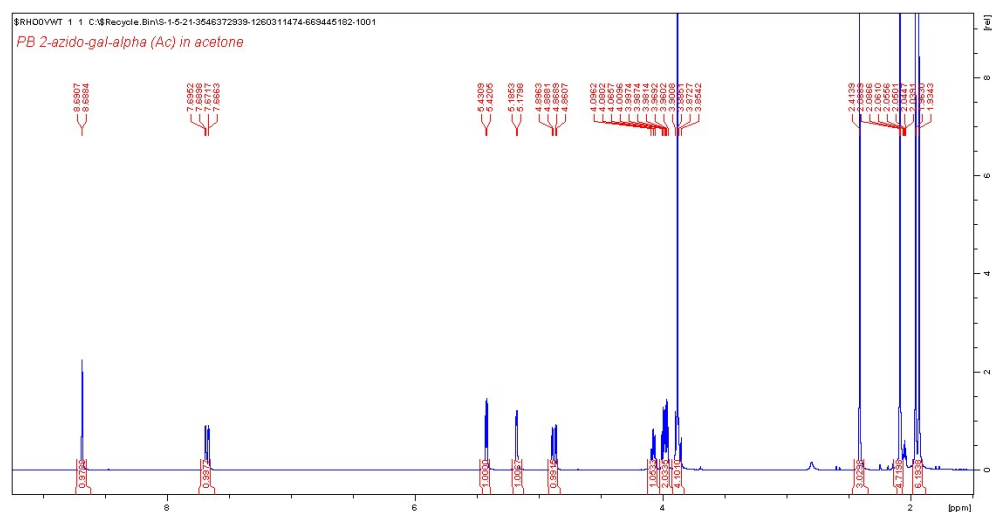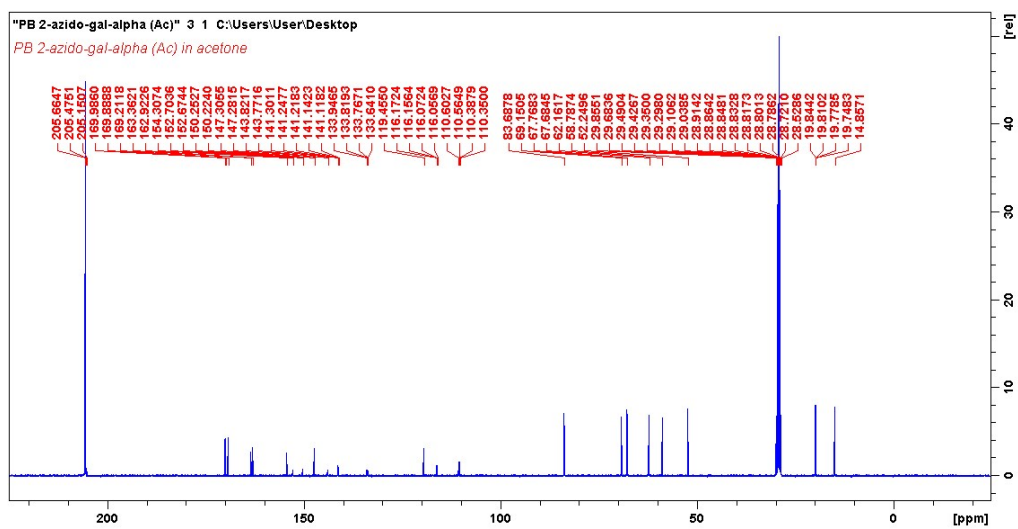

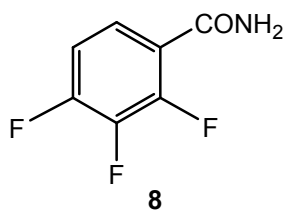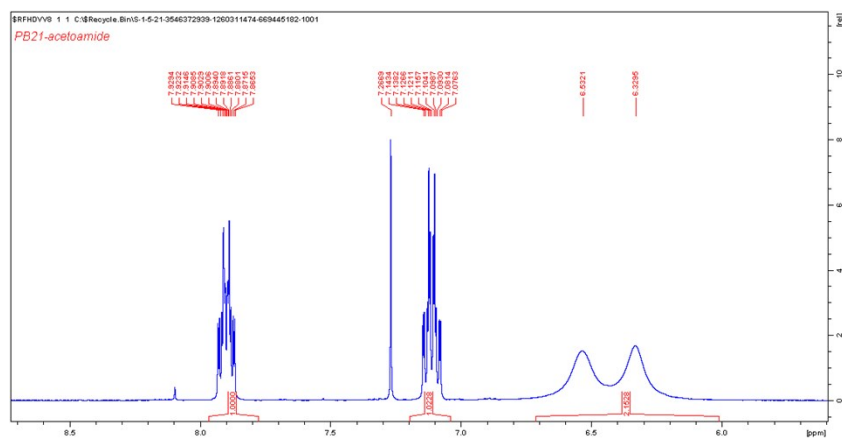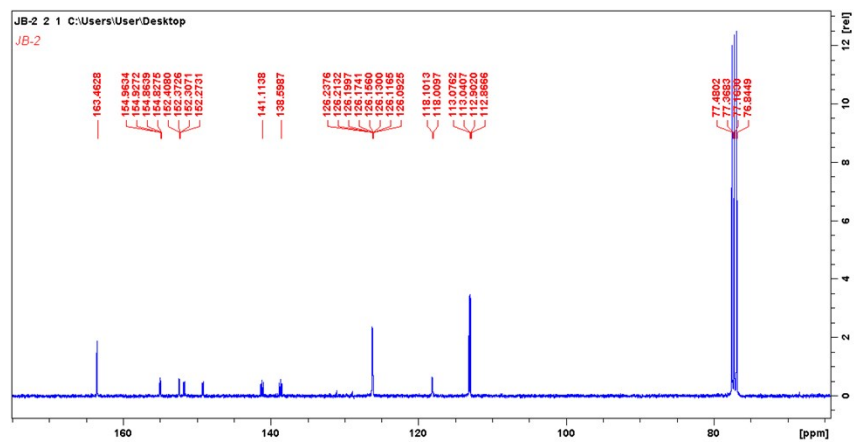

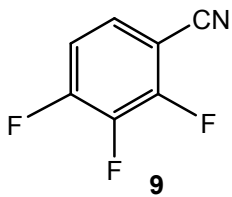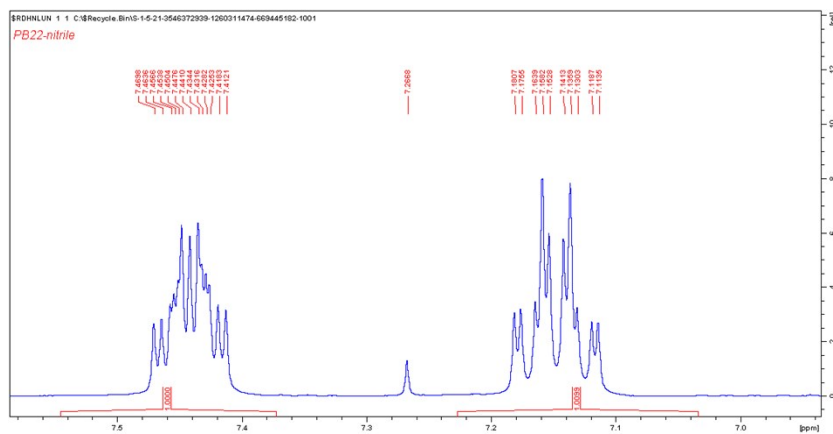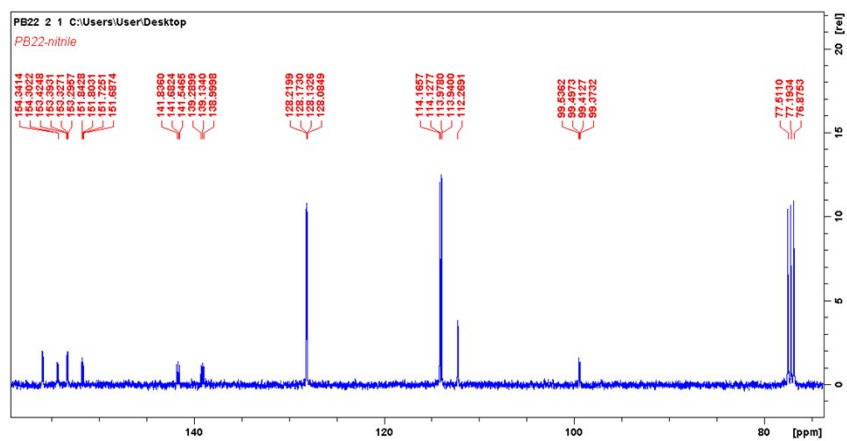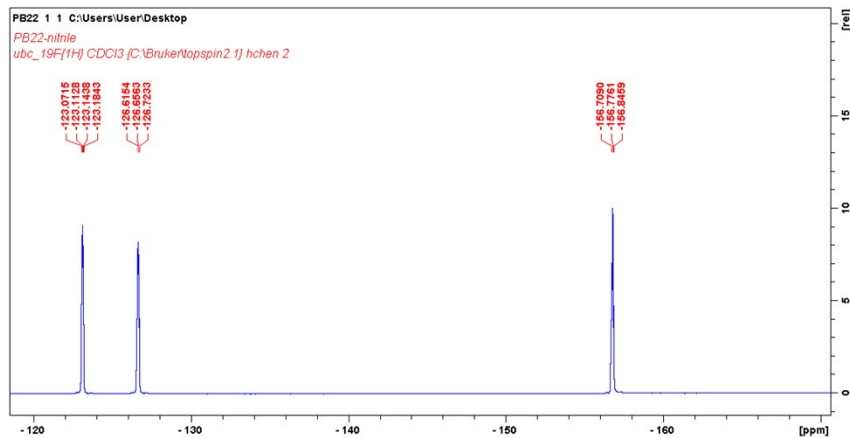

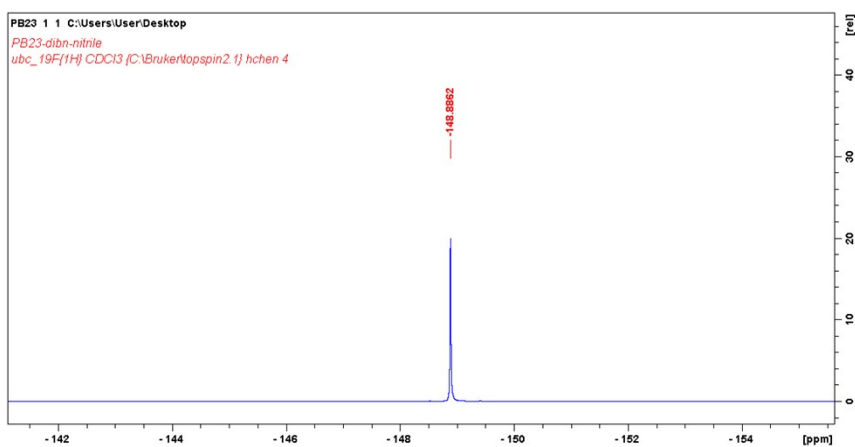

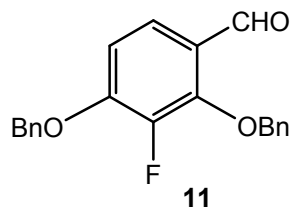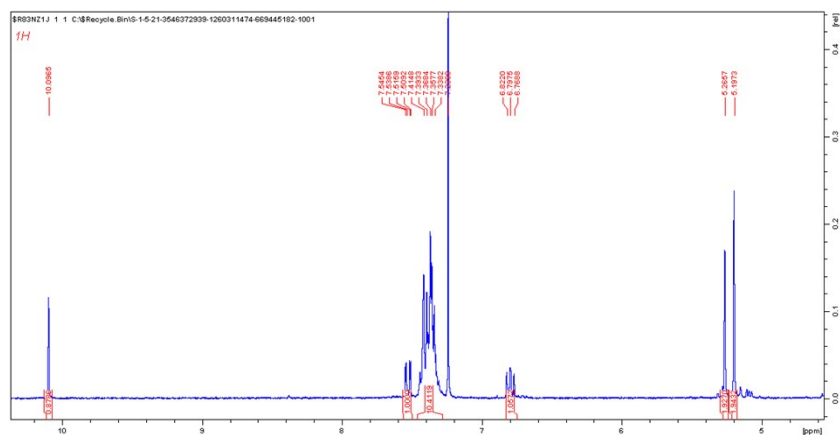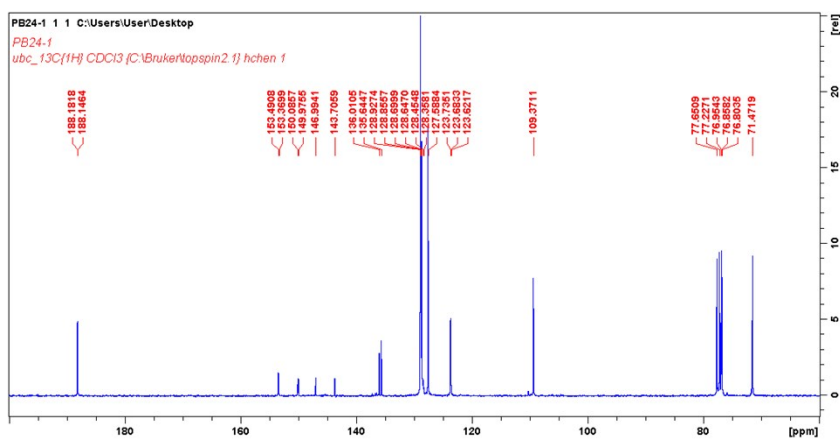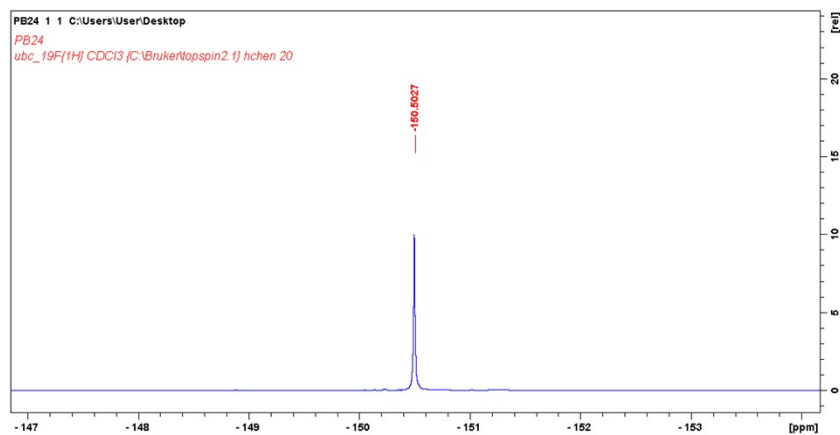

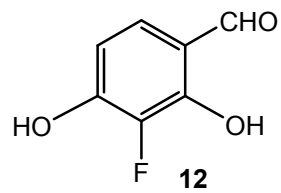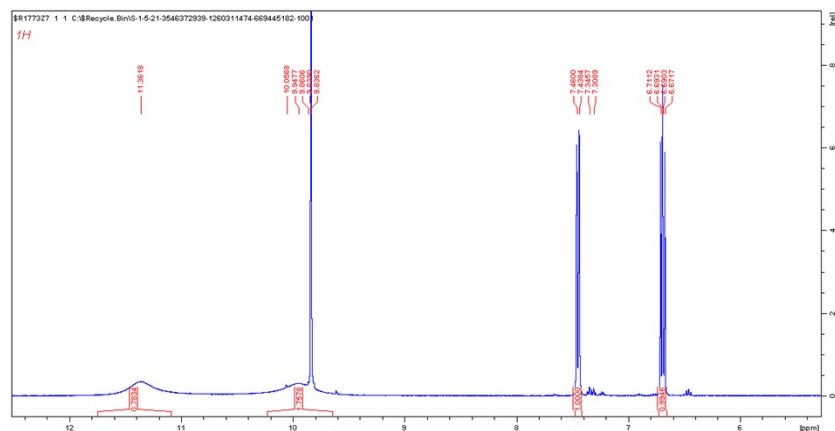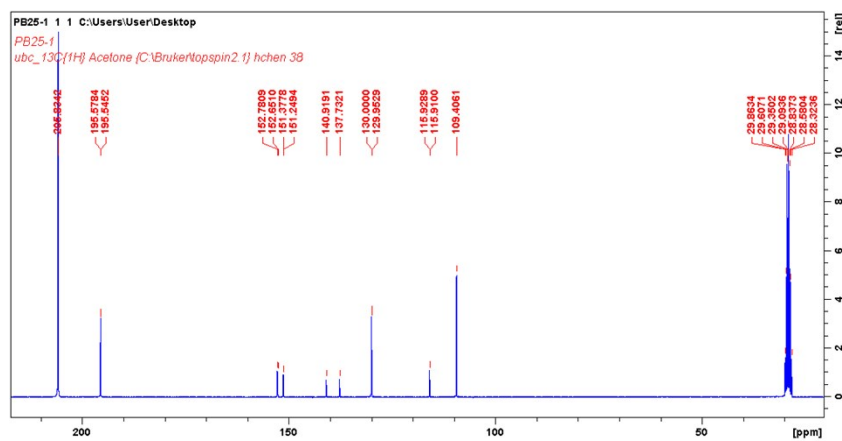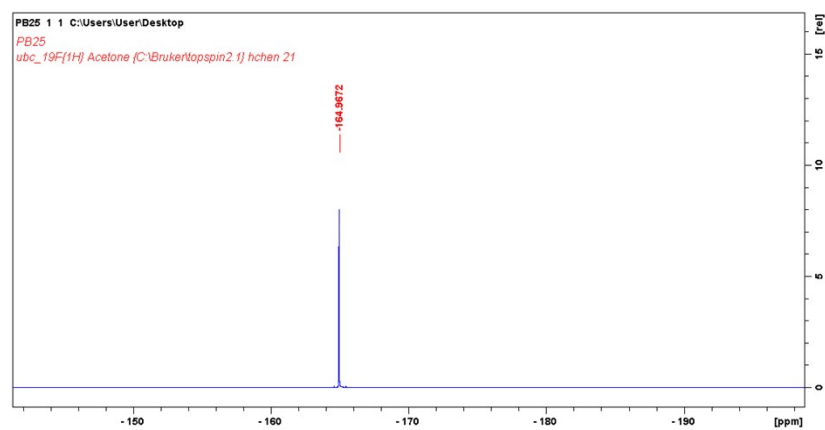

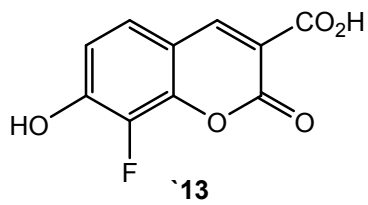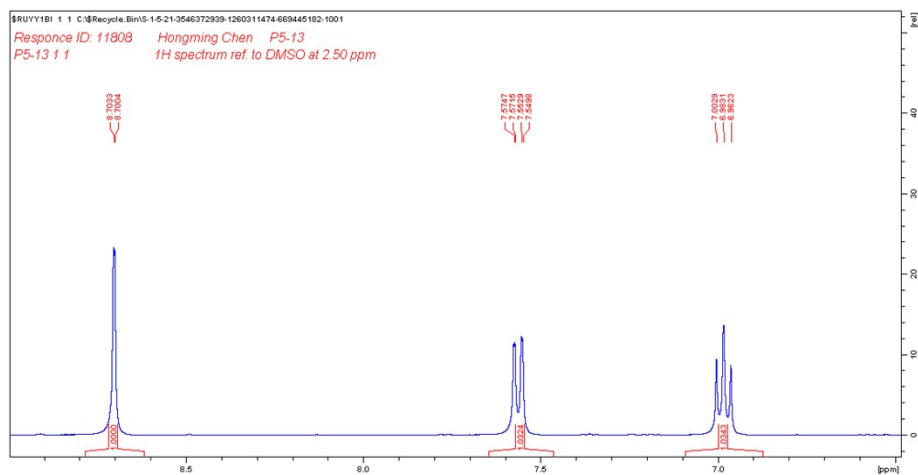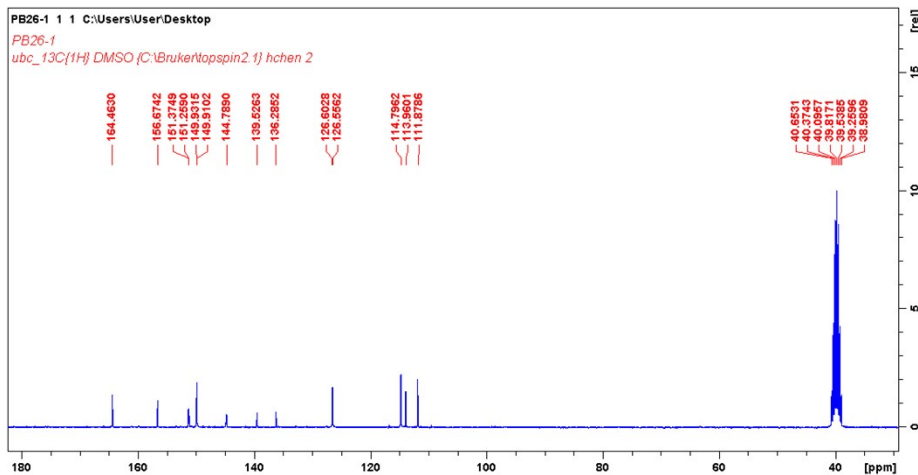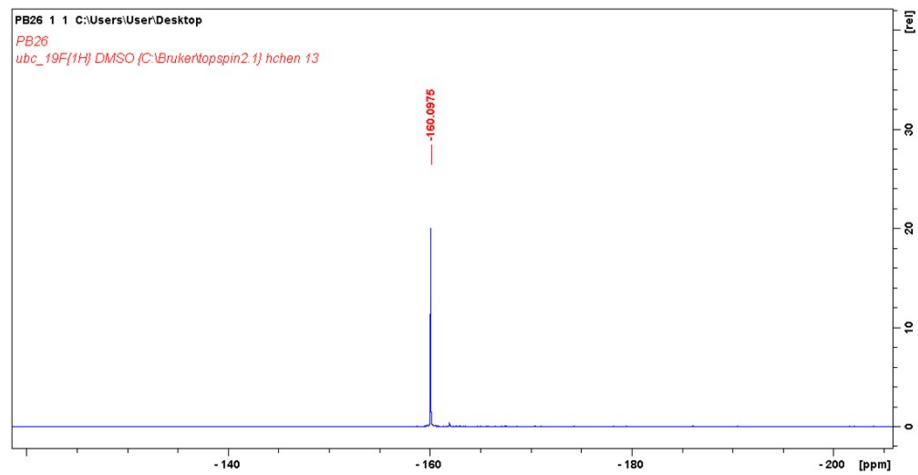

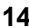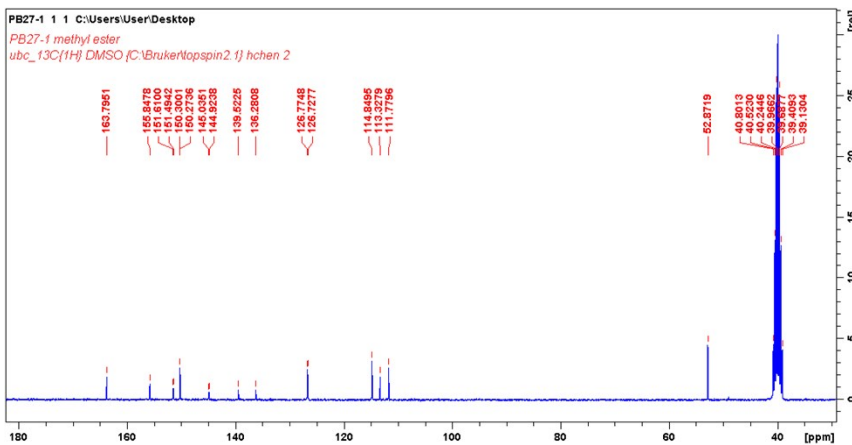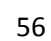

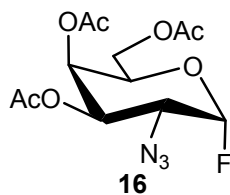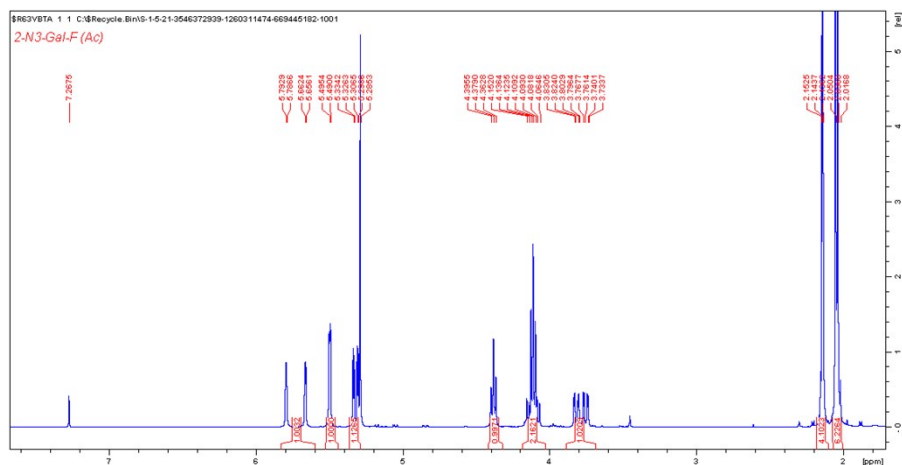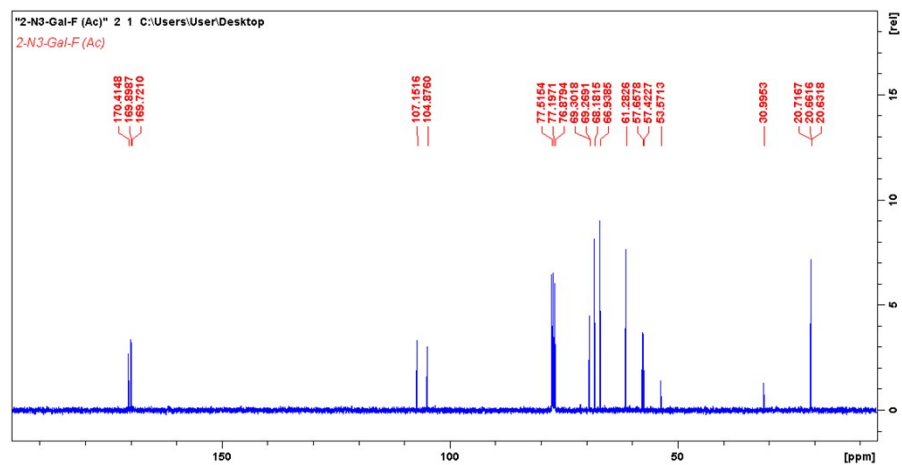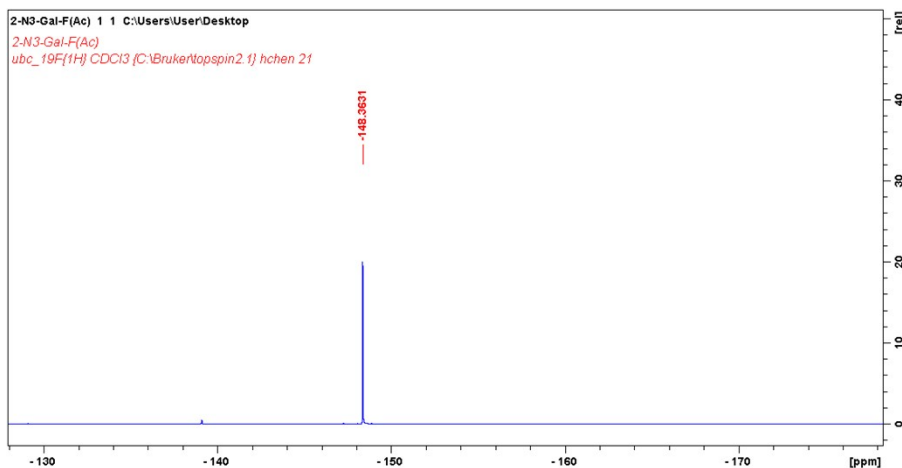

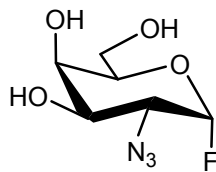

17

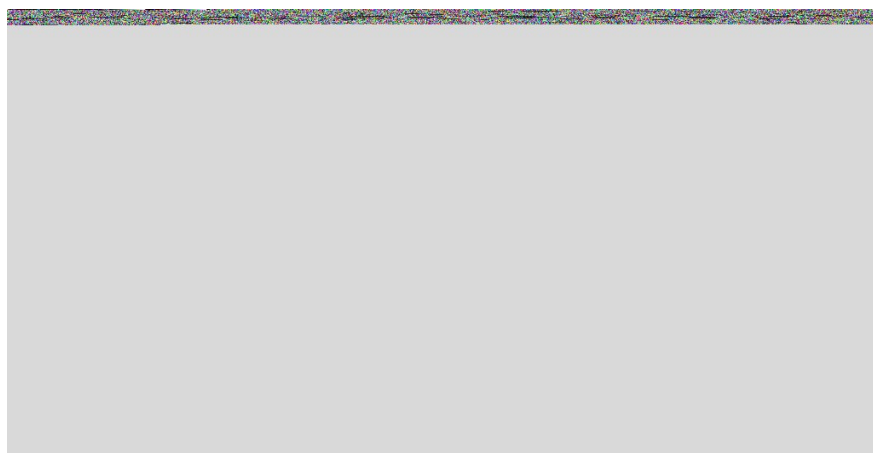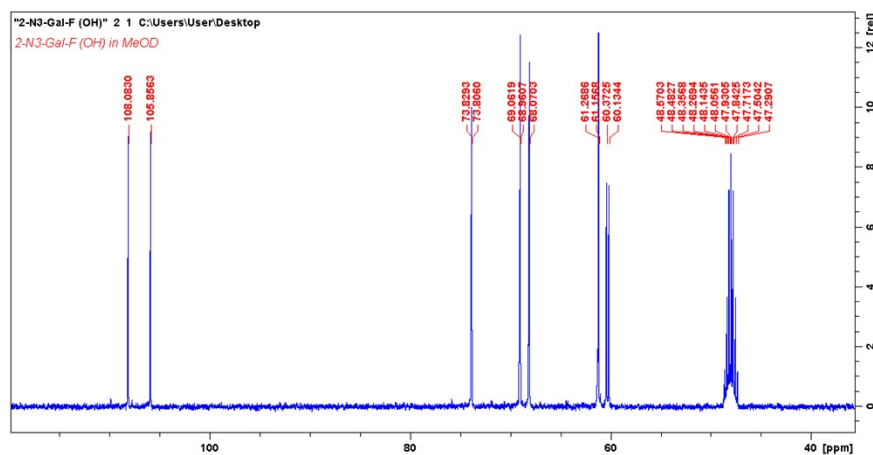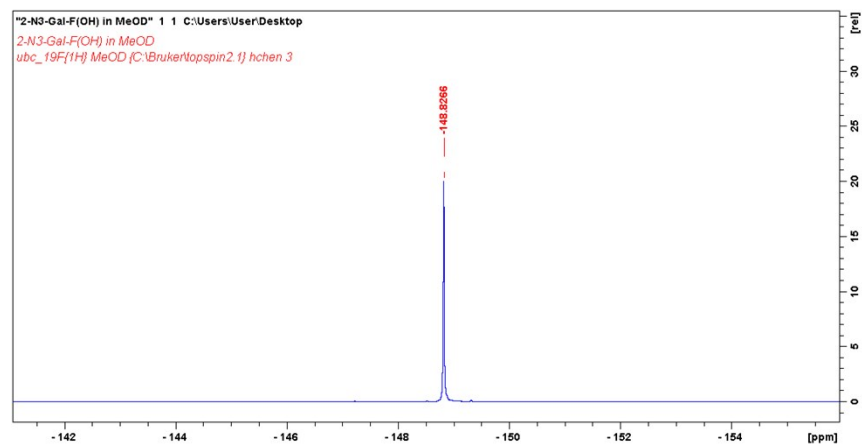

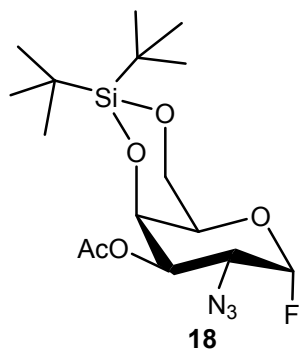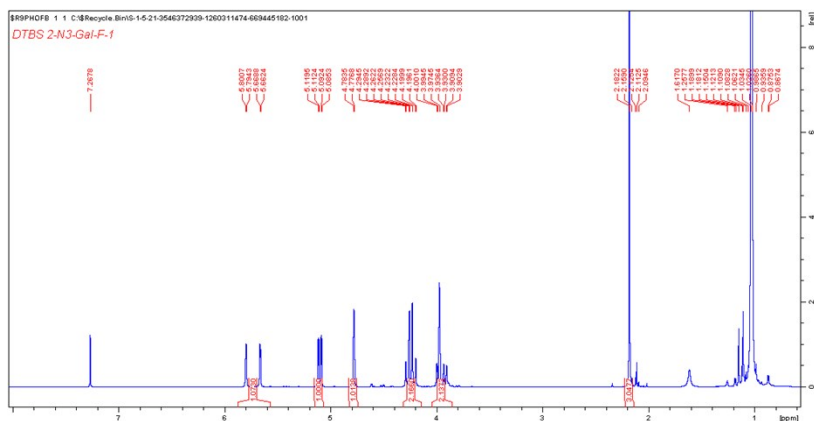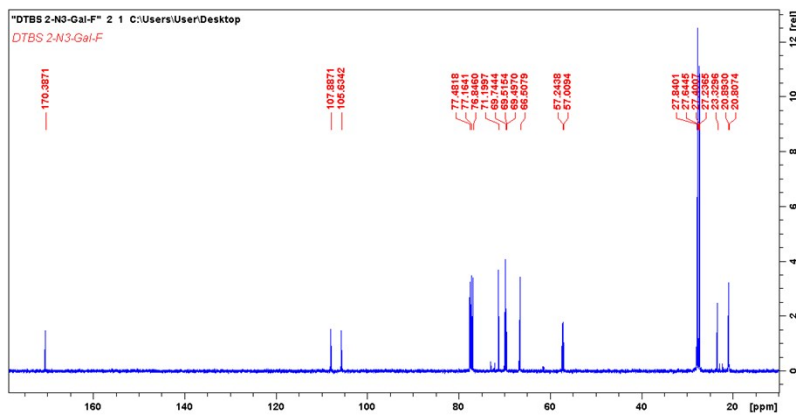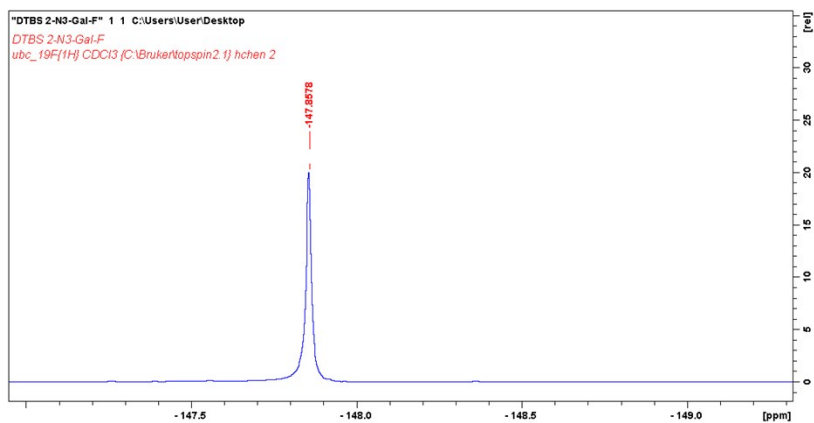

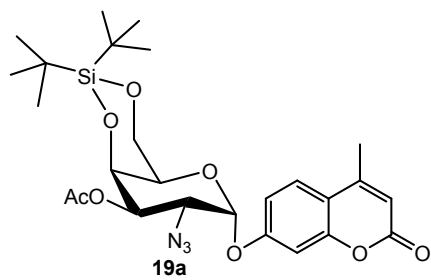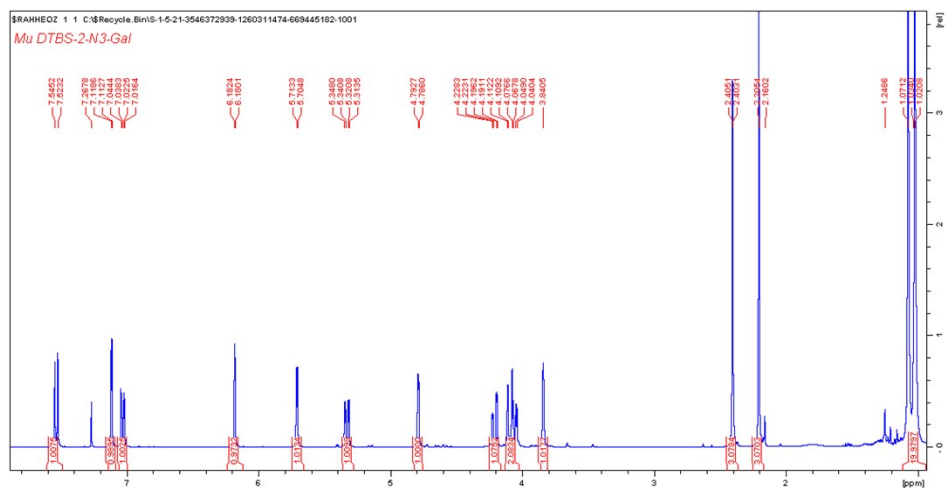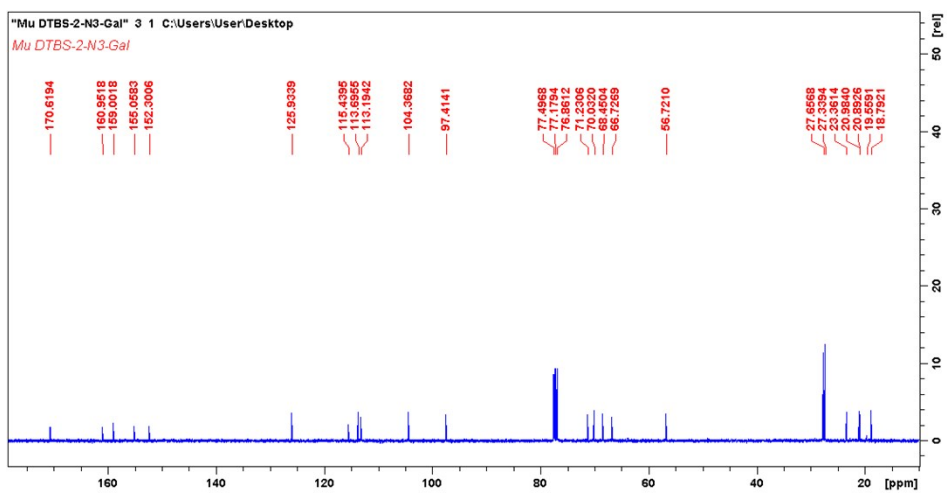

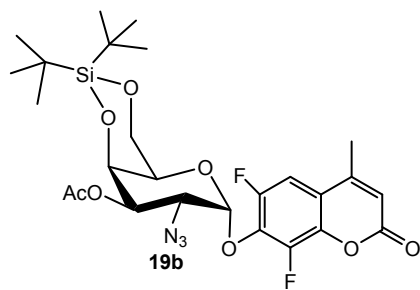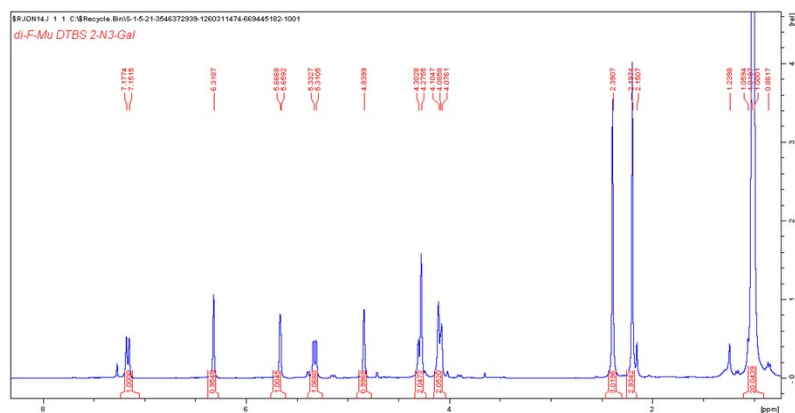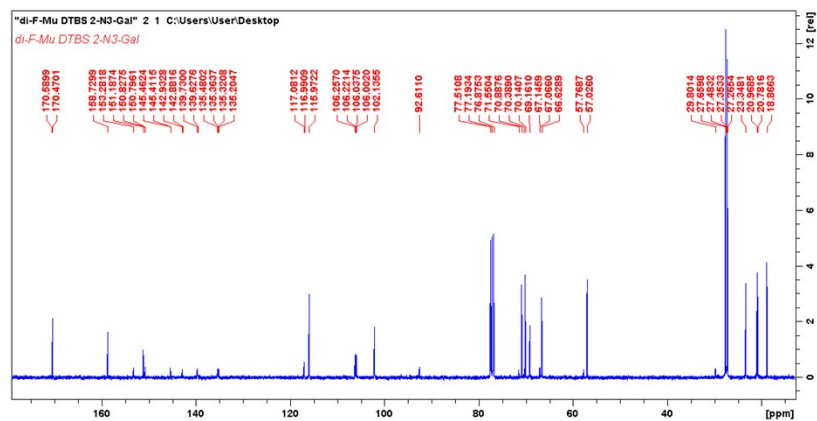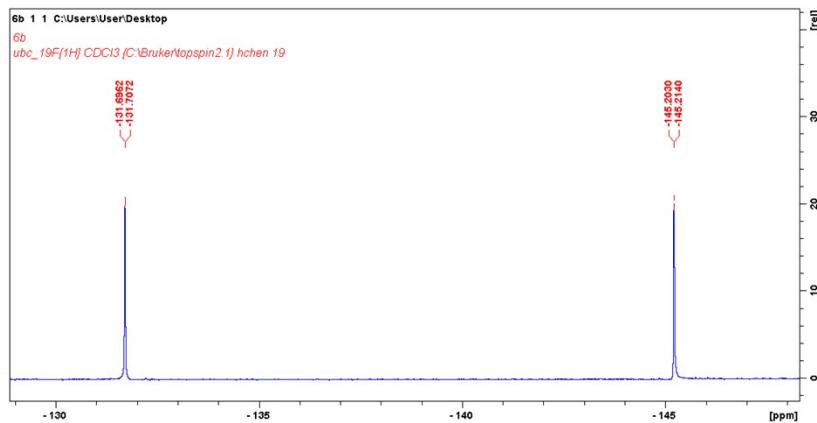

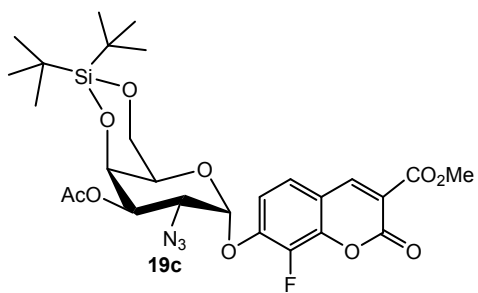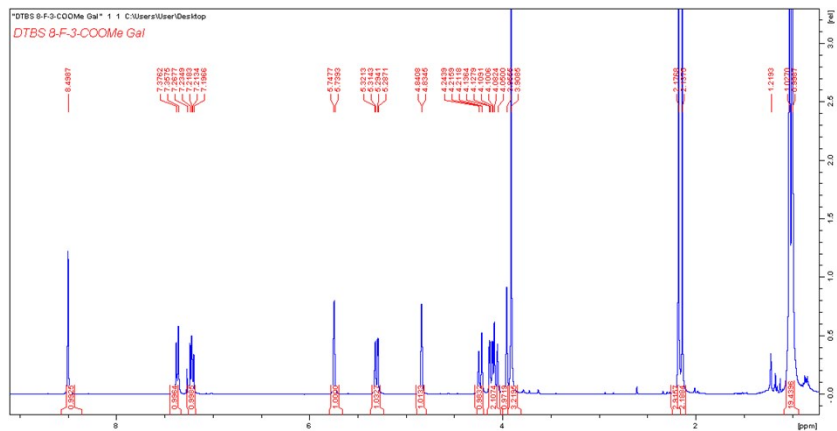

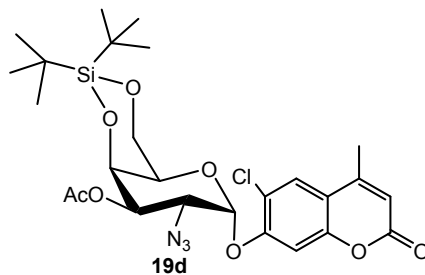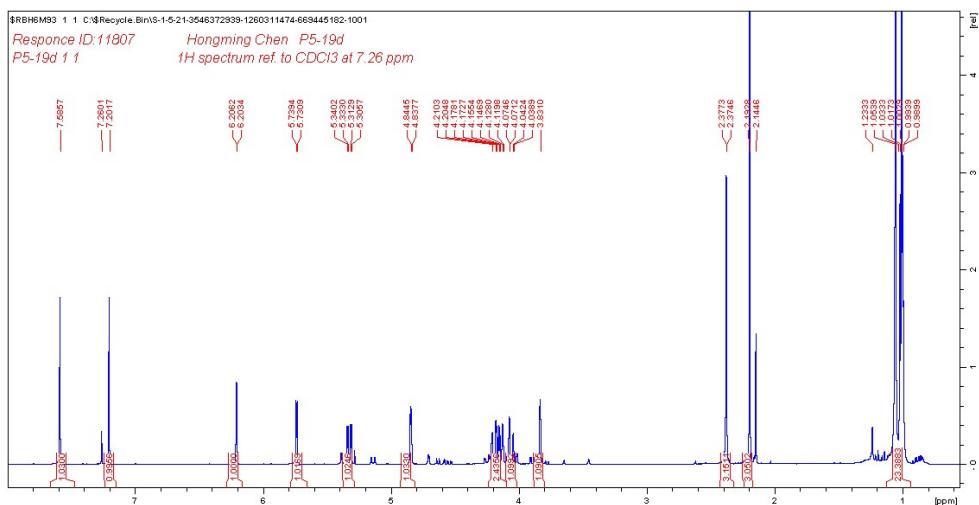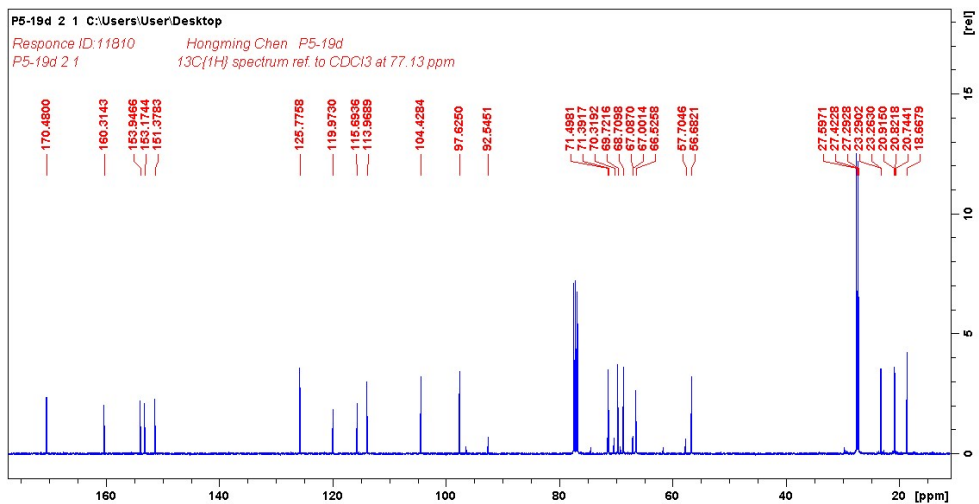

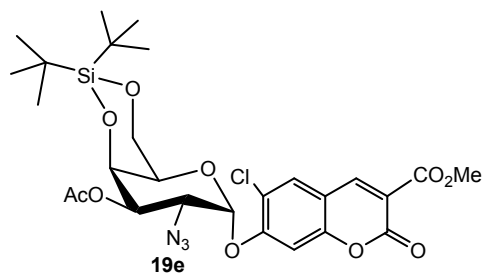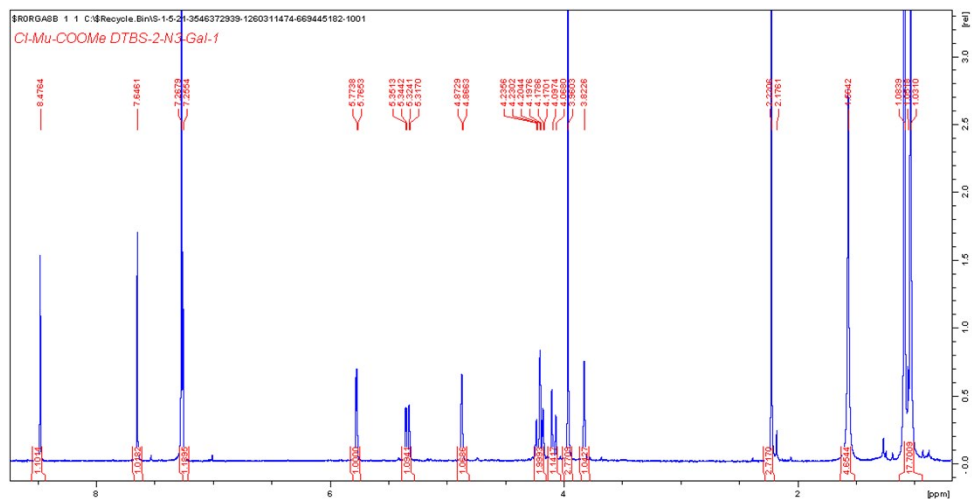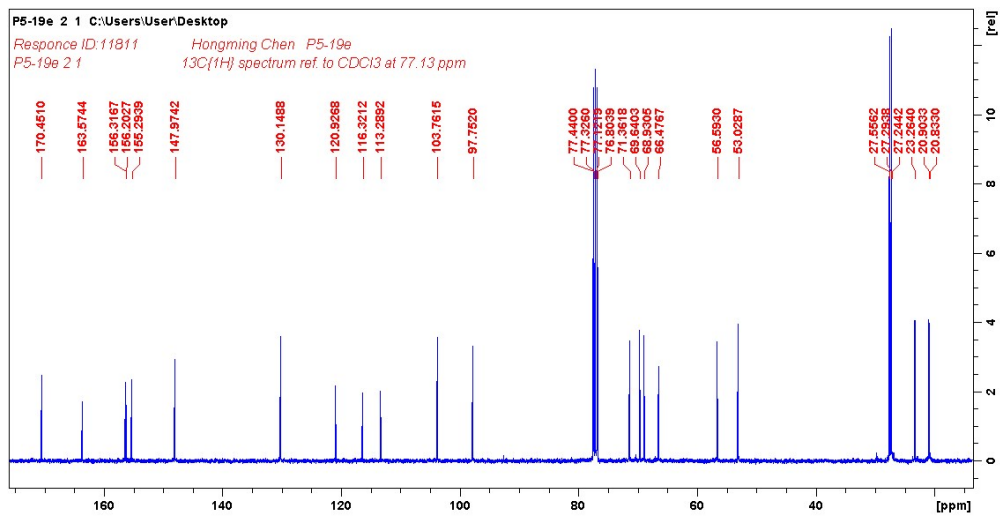



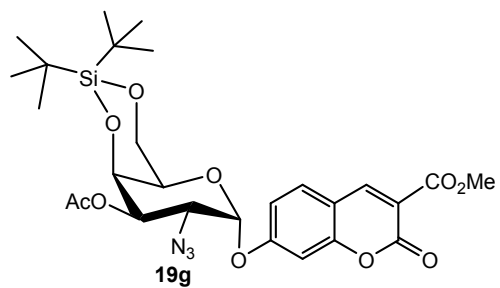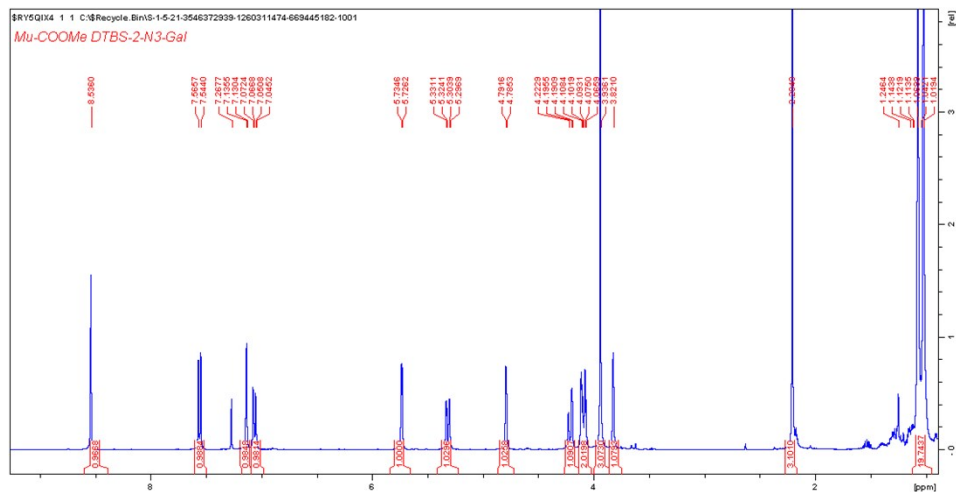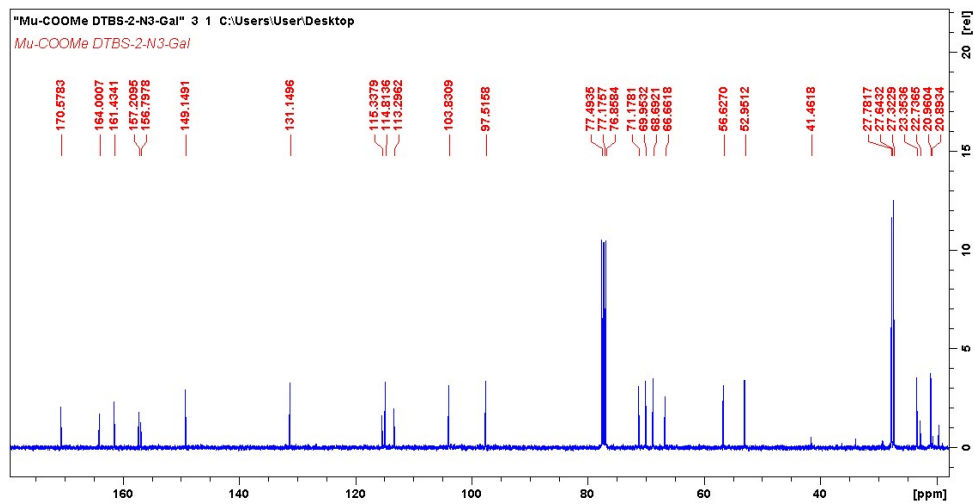

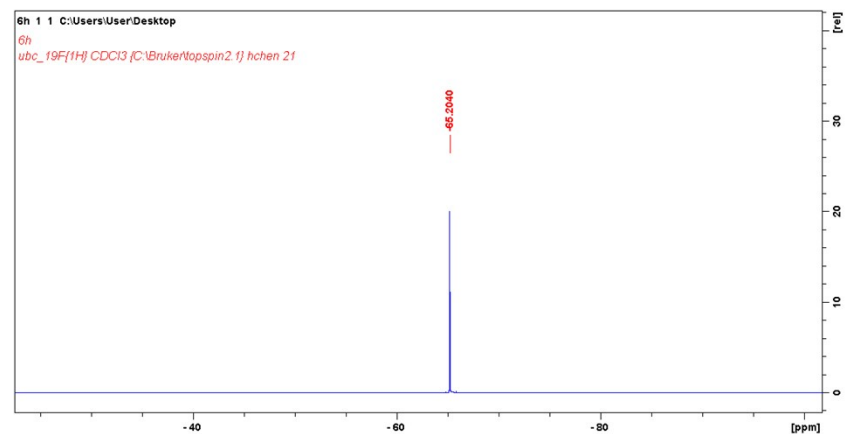

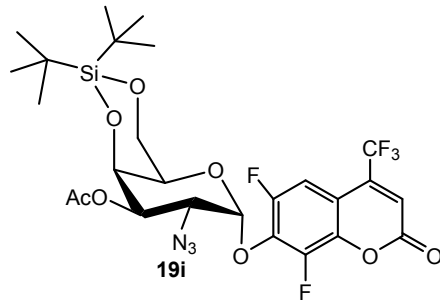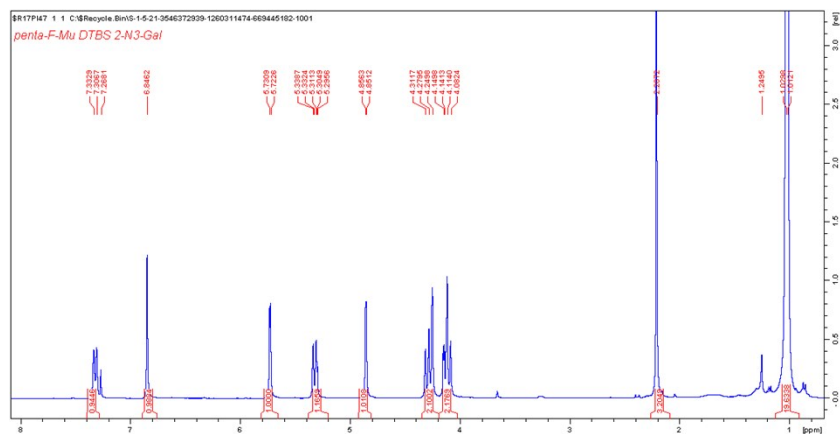

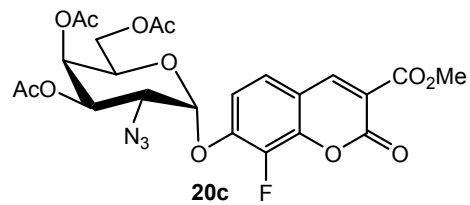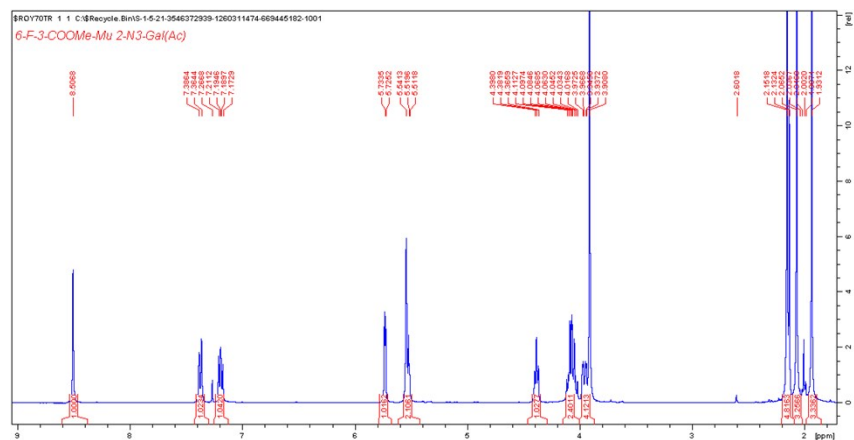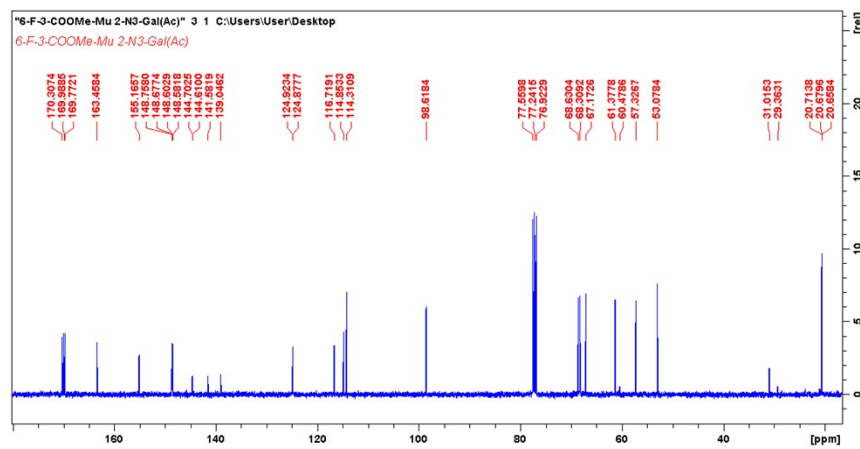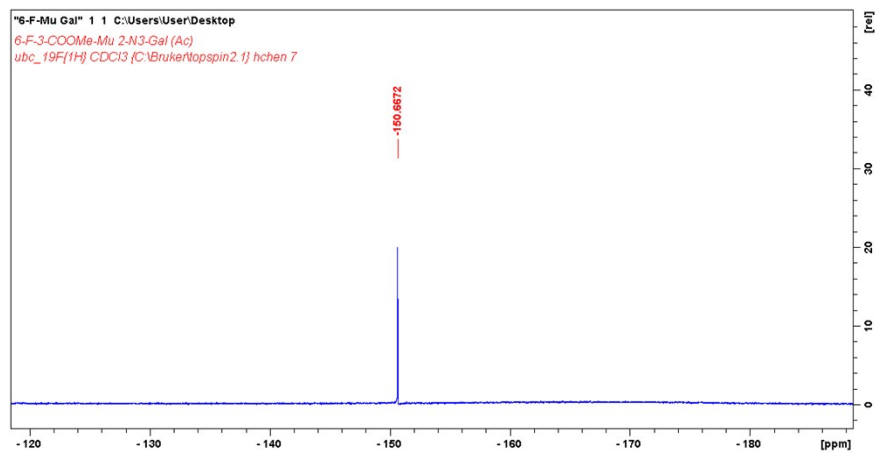

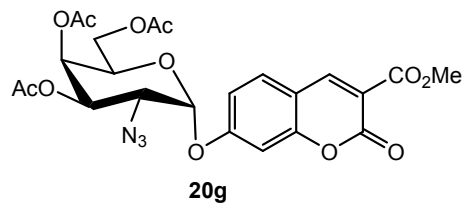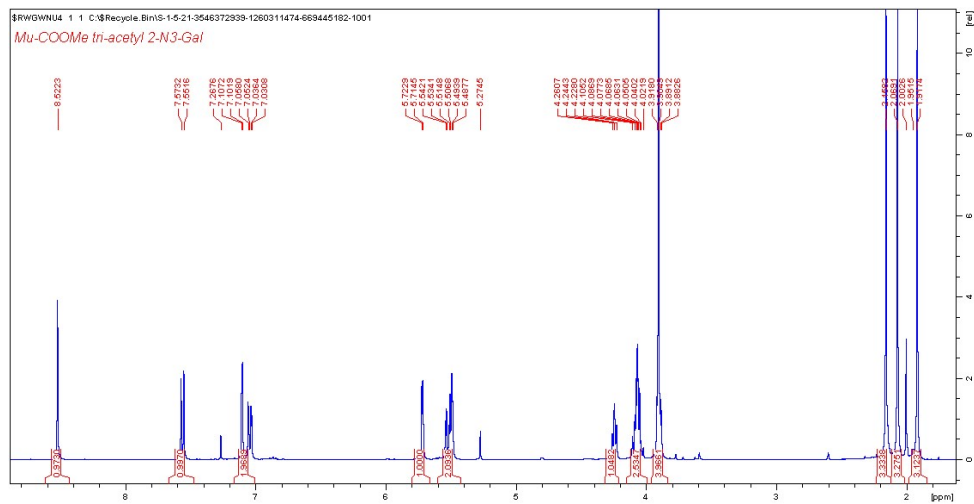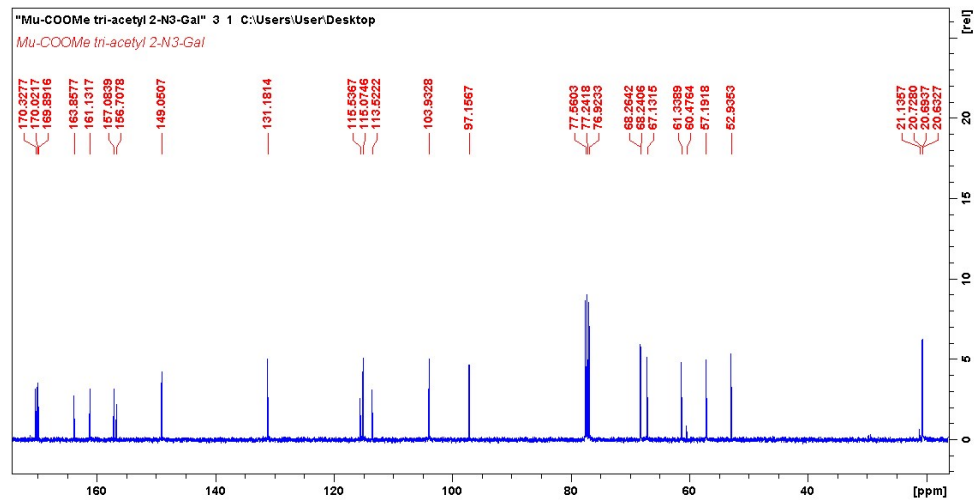

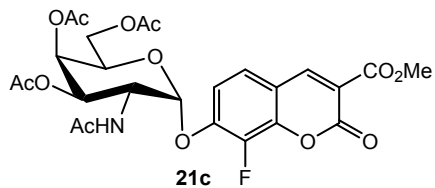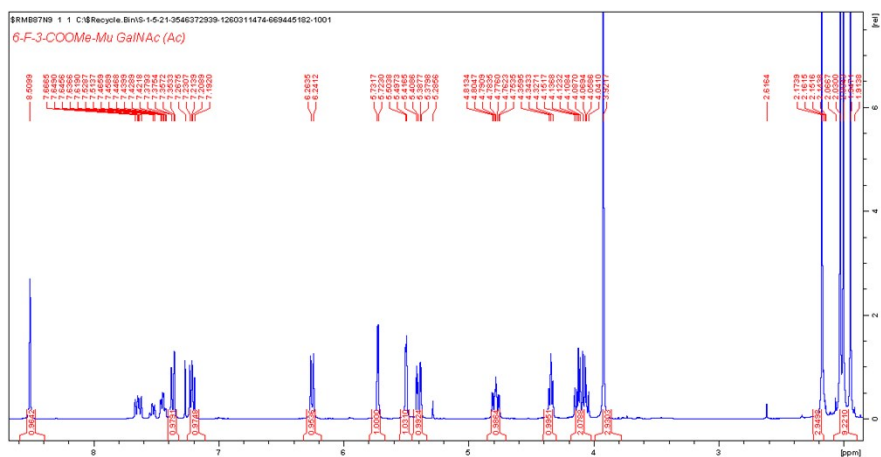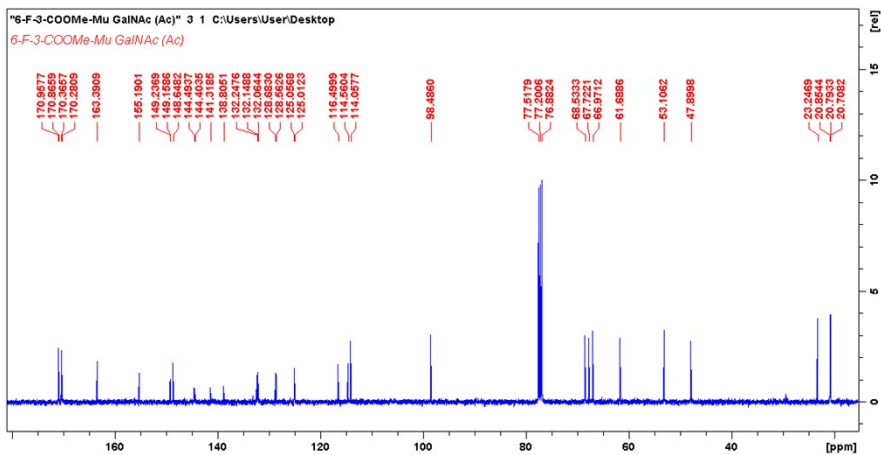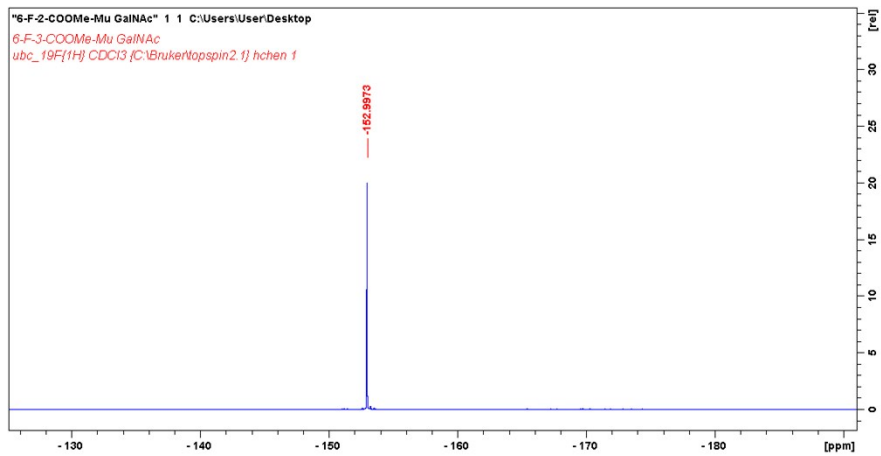

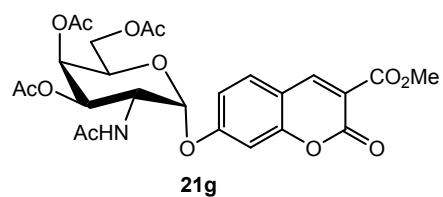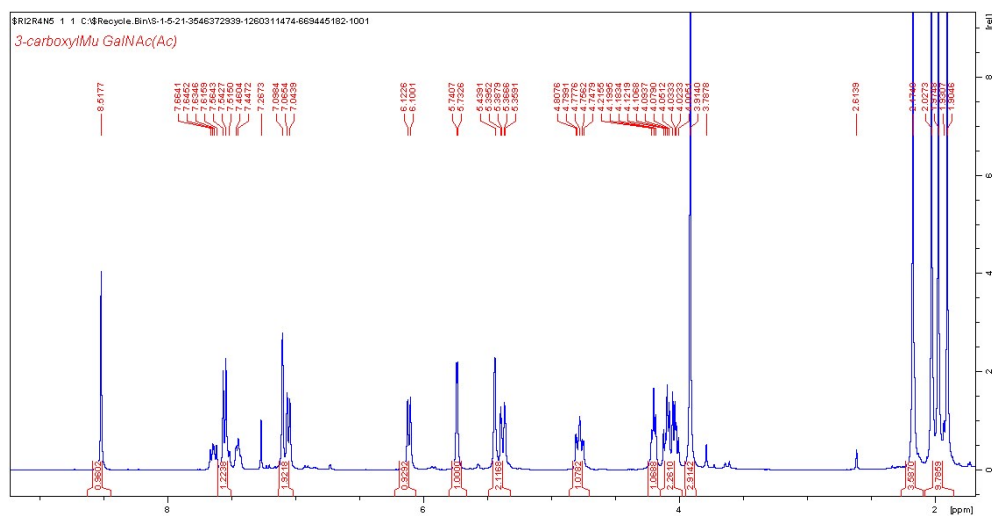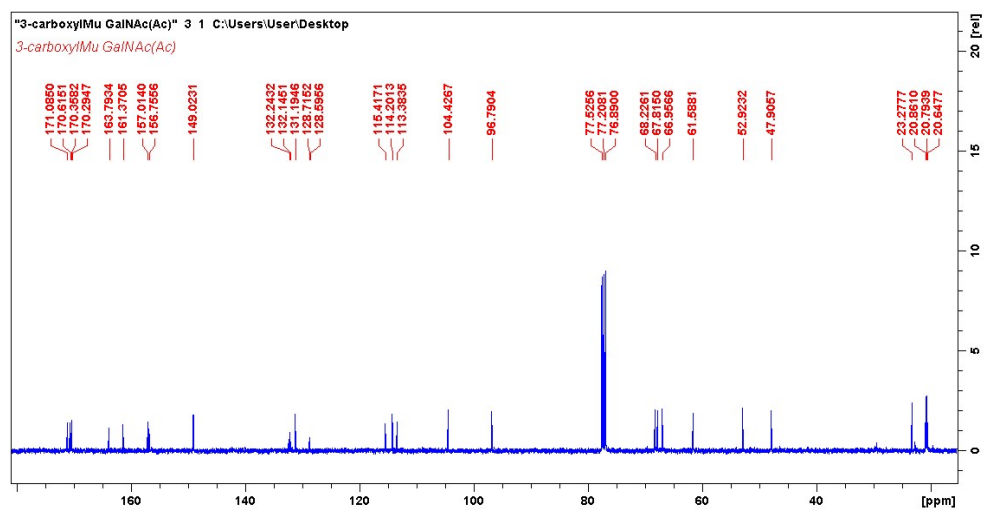

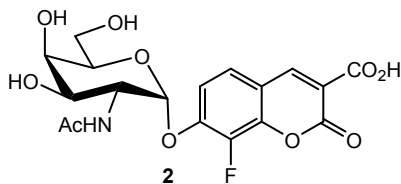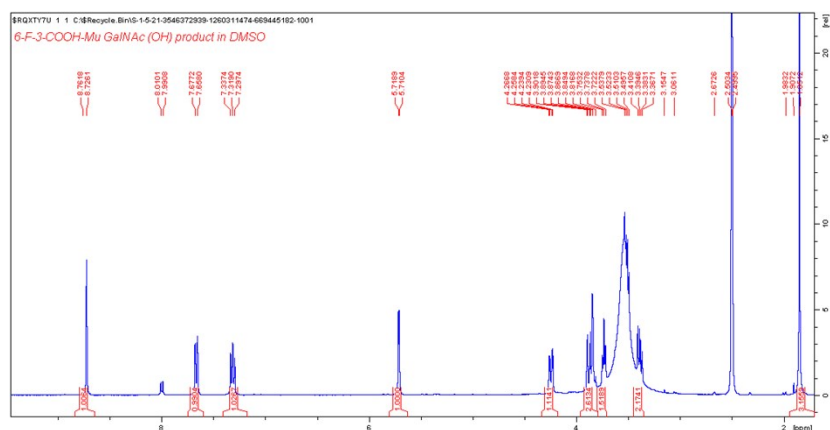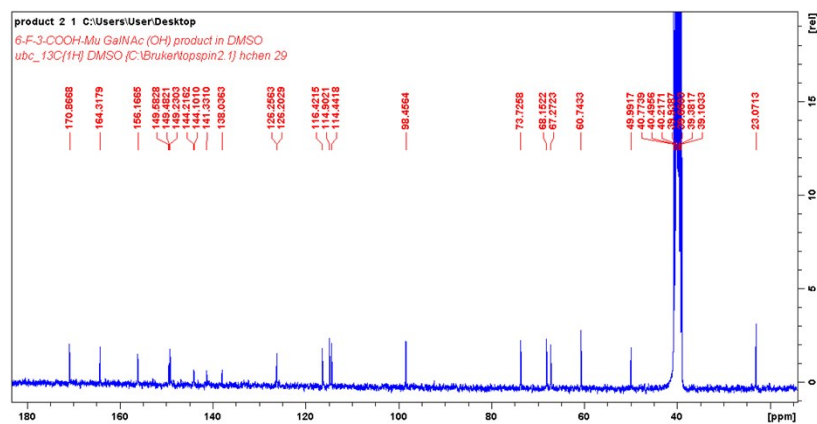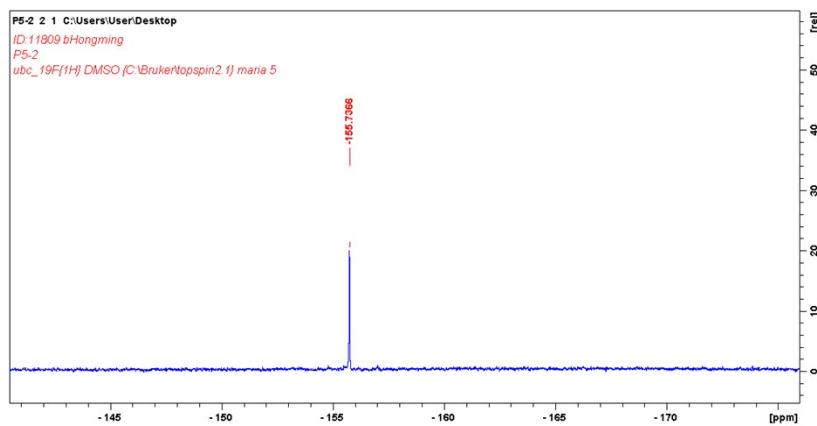

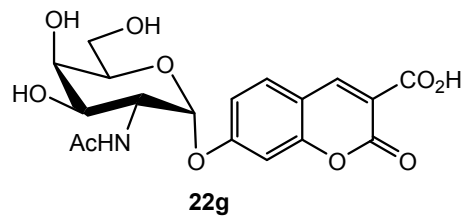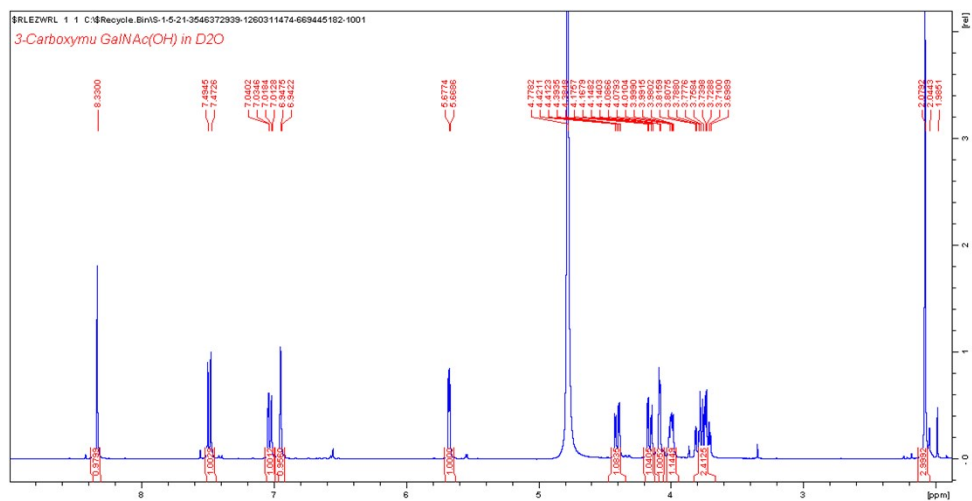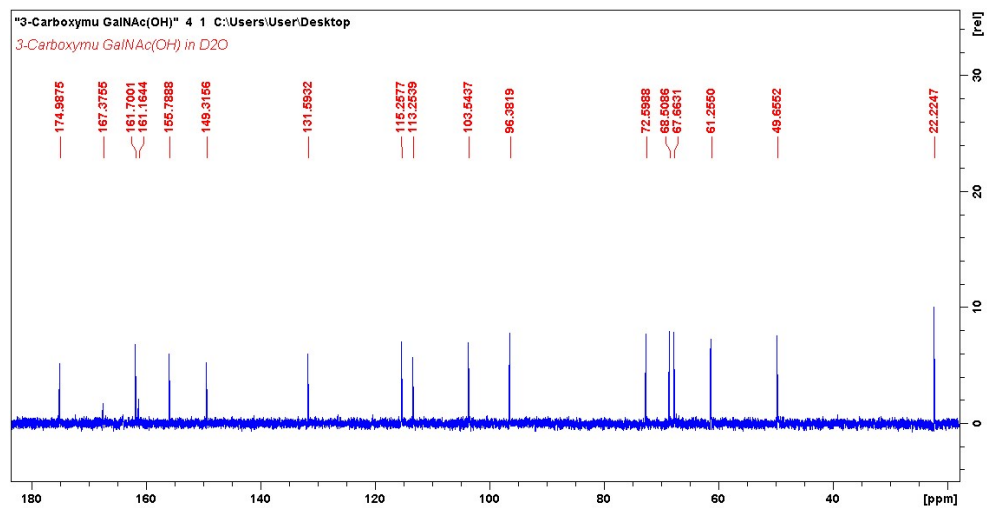

Supplement: d0ob02484h1.pdf [file d0ob02484h1.pdf]
